# Supplementary material for: Body Shape Phenotypes and Breast Cancer Risk: A Mendelian Randomization Analysis
Source: MDPI journal article supplement (doi:10.3390/cancers15041296), 2023-02-17
Supplement: s1 [file s1]

## Supplementary Figures and Tables

|                               |    |
|-------------------------------|----|
| Supplementary Figure S1 ..... | 2  |
| Supplementary Figure S2 ..... | 3  |
| Supplementary Figure S3 ..... | 6  |
| Supplementary Figure S4 ..... | 7  |
| Supplementary Table S1 .....  | 8  |
| Supplementary Table S2 .....  | 9  |
| Supplementary Table S3 .....  | 10 |
| Supplementary Table S4 .....  | 11 |
| References .....              | 12 |

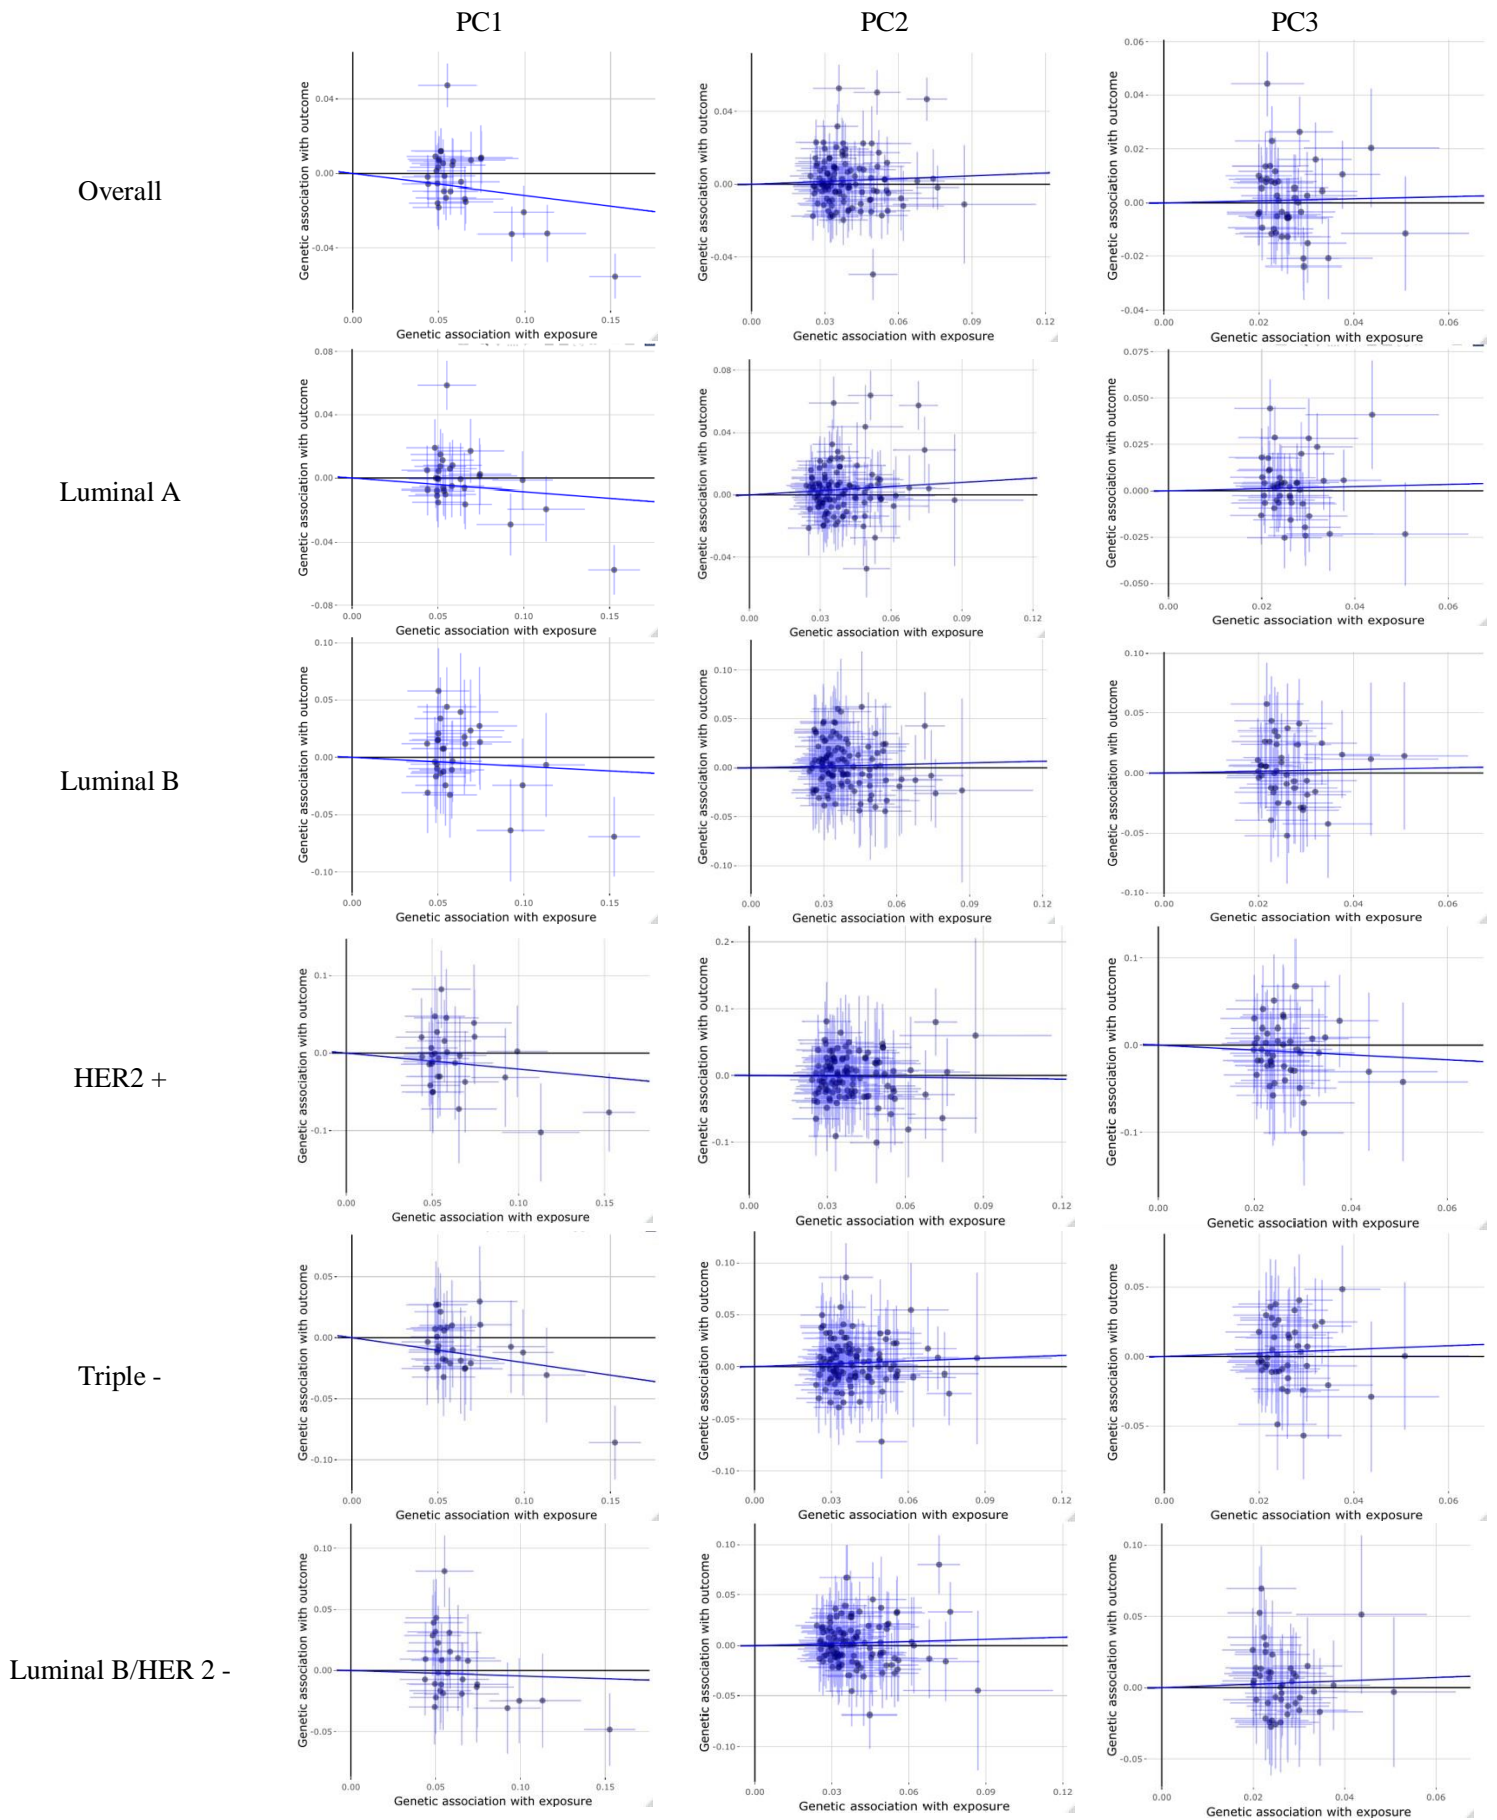

**Supplementary Figure S1.** Scatter plots of associations between body shapes and overall breast cancer and sub-types.

A

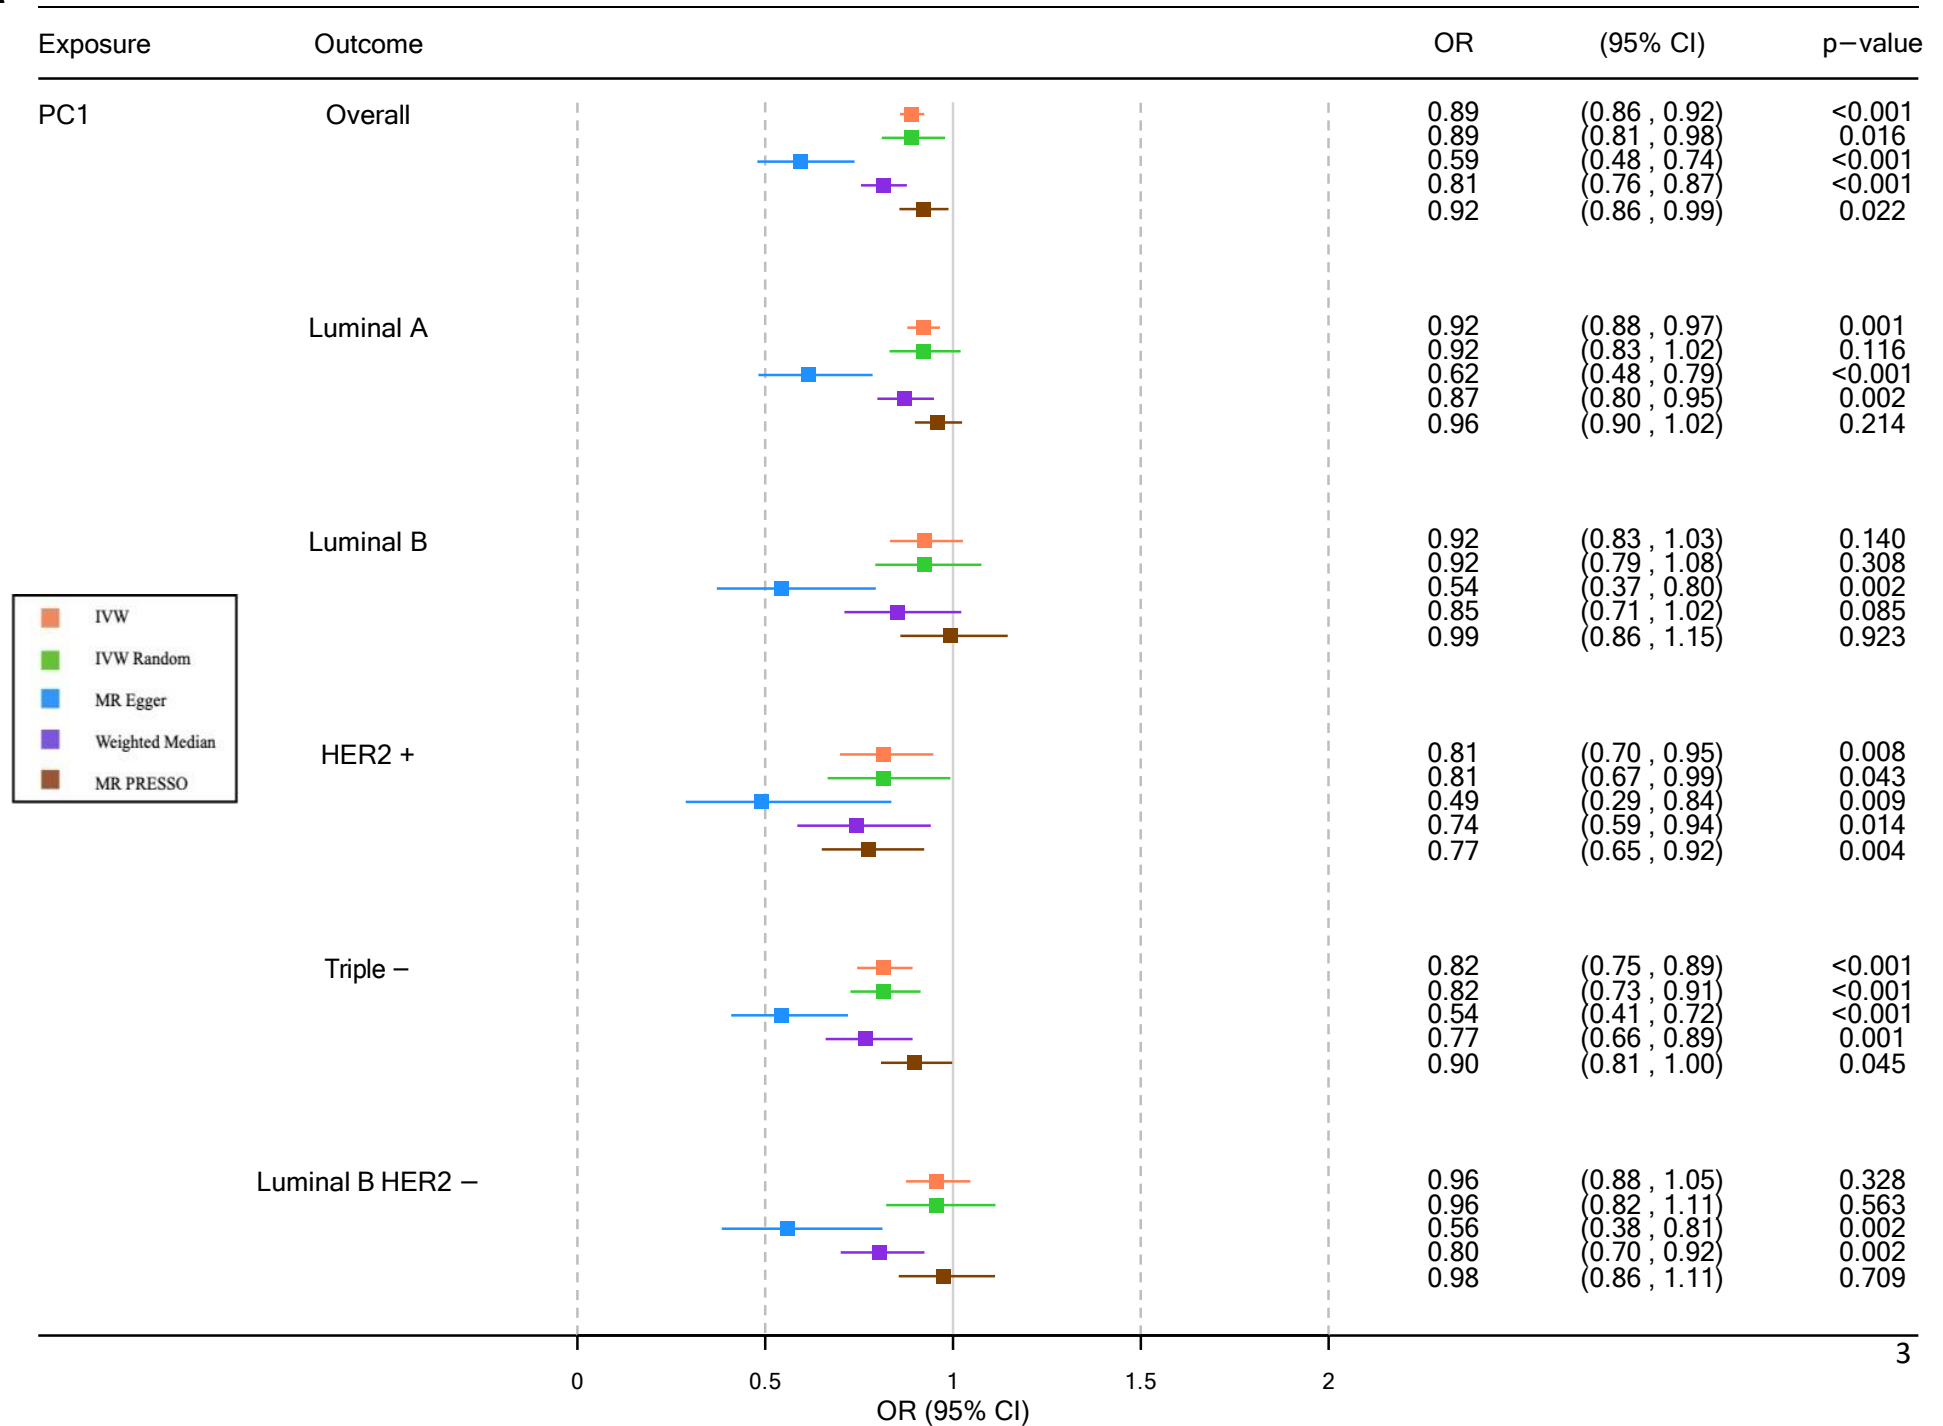

**B**

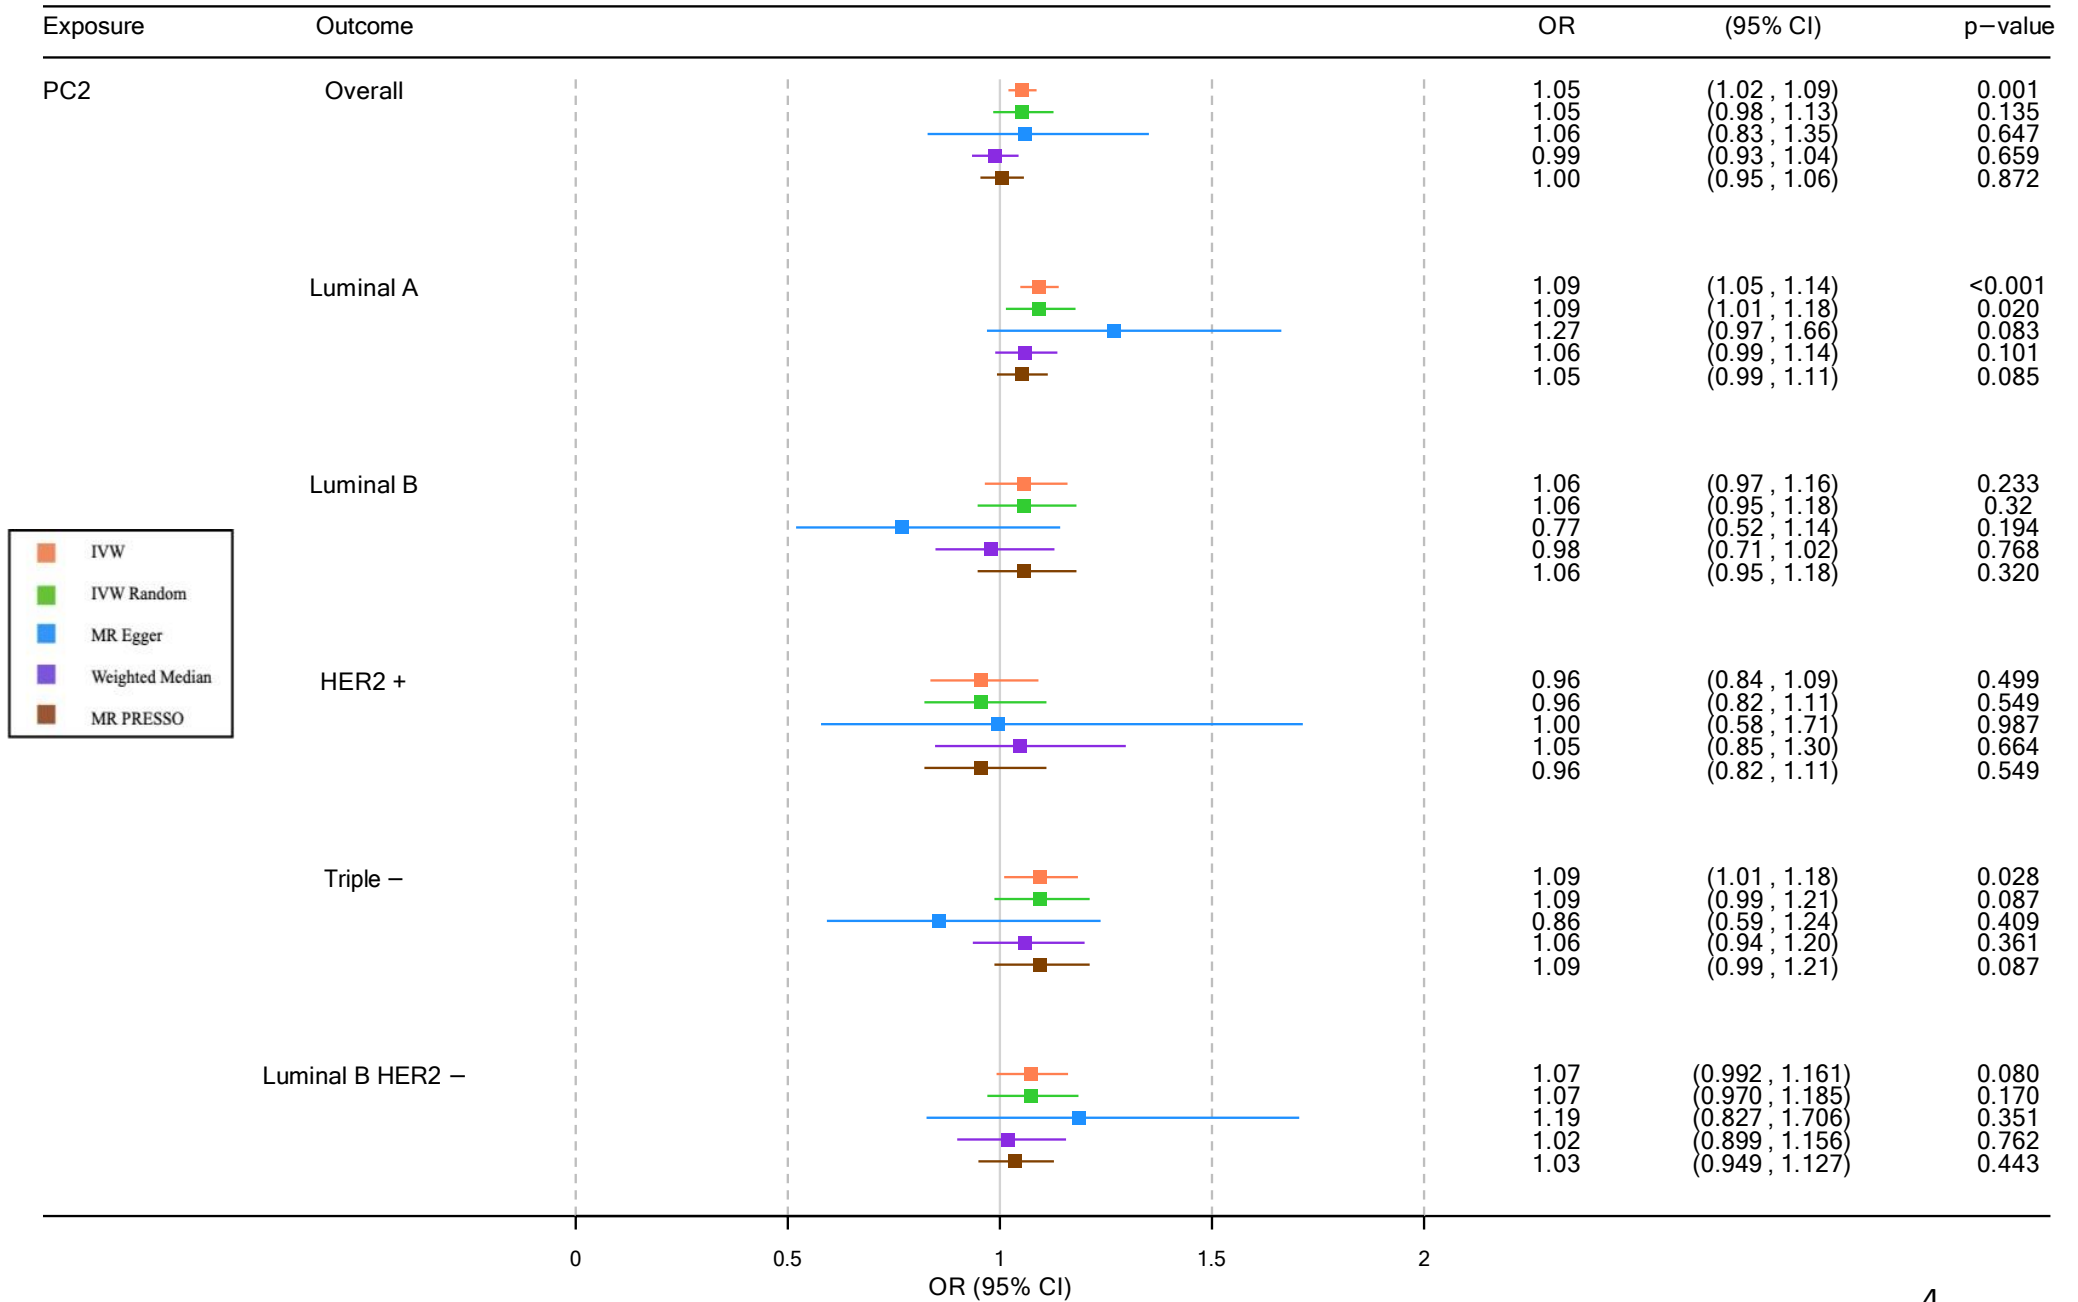

C

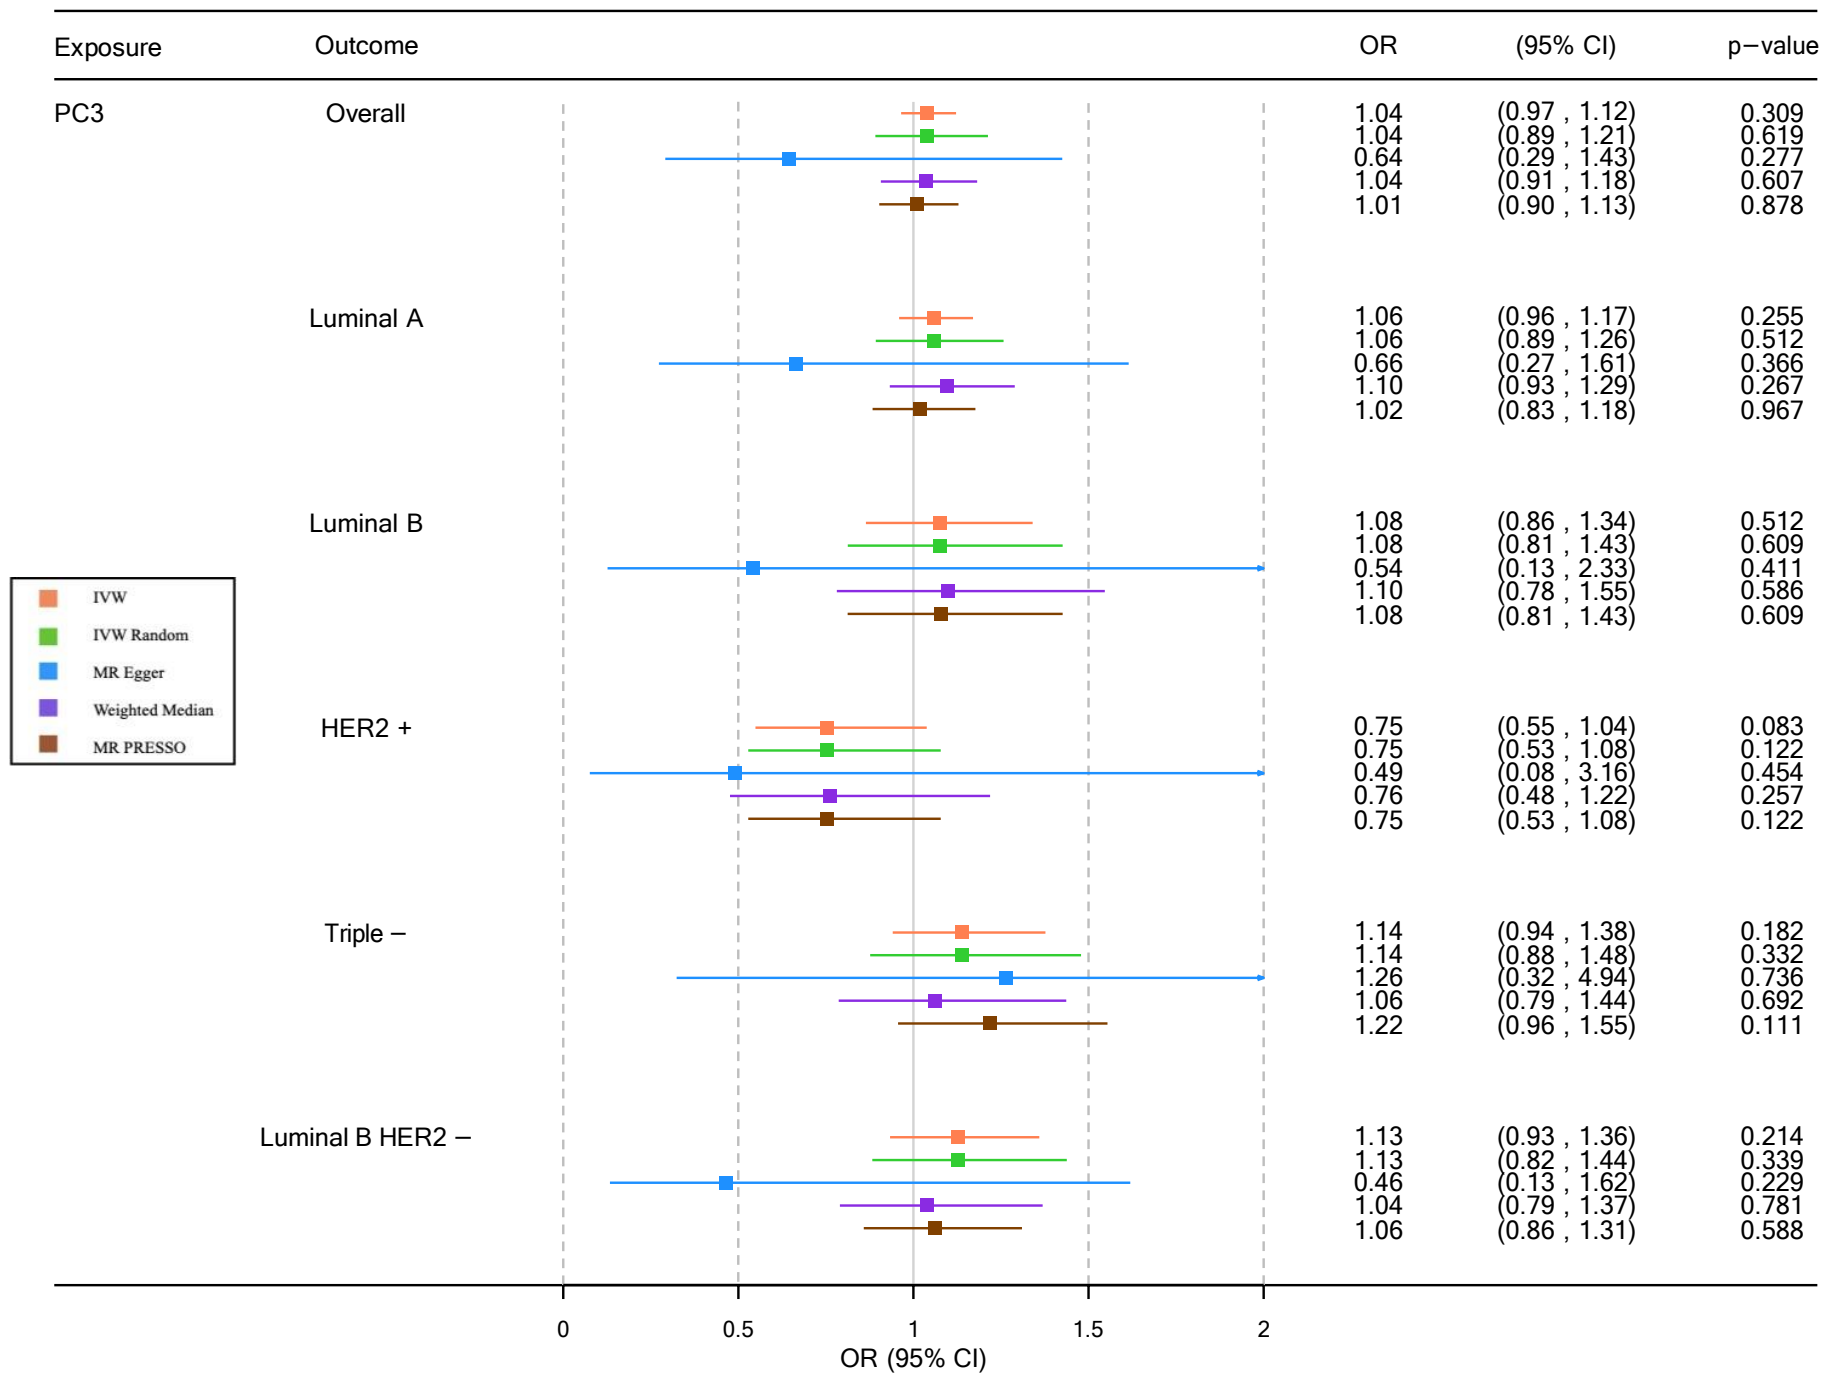

**Supplementary Figure S2.** Mendelian randomization estimates between body shape phenotype PC1 (A), PC2 (B) and PC3 (C) and overall and subtypes breast cancer risk using IVW (orange), IVW Random (green), MR Egger (blue), Weighted Median (violet) and MR PRESSO (brown) MR approaches. CI, confidence interval; OR, odds ratio.

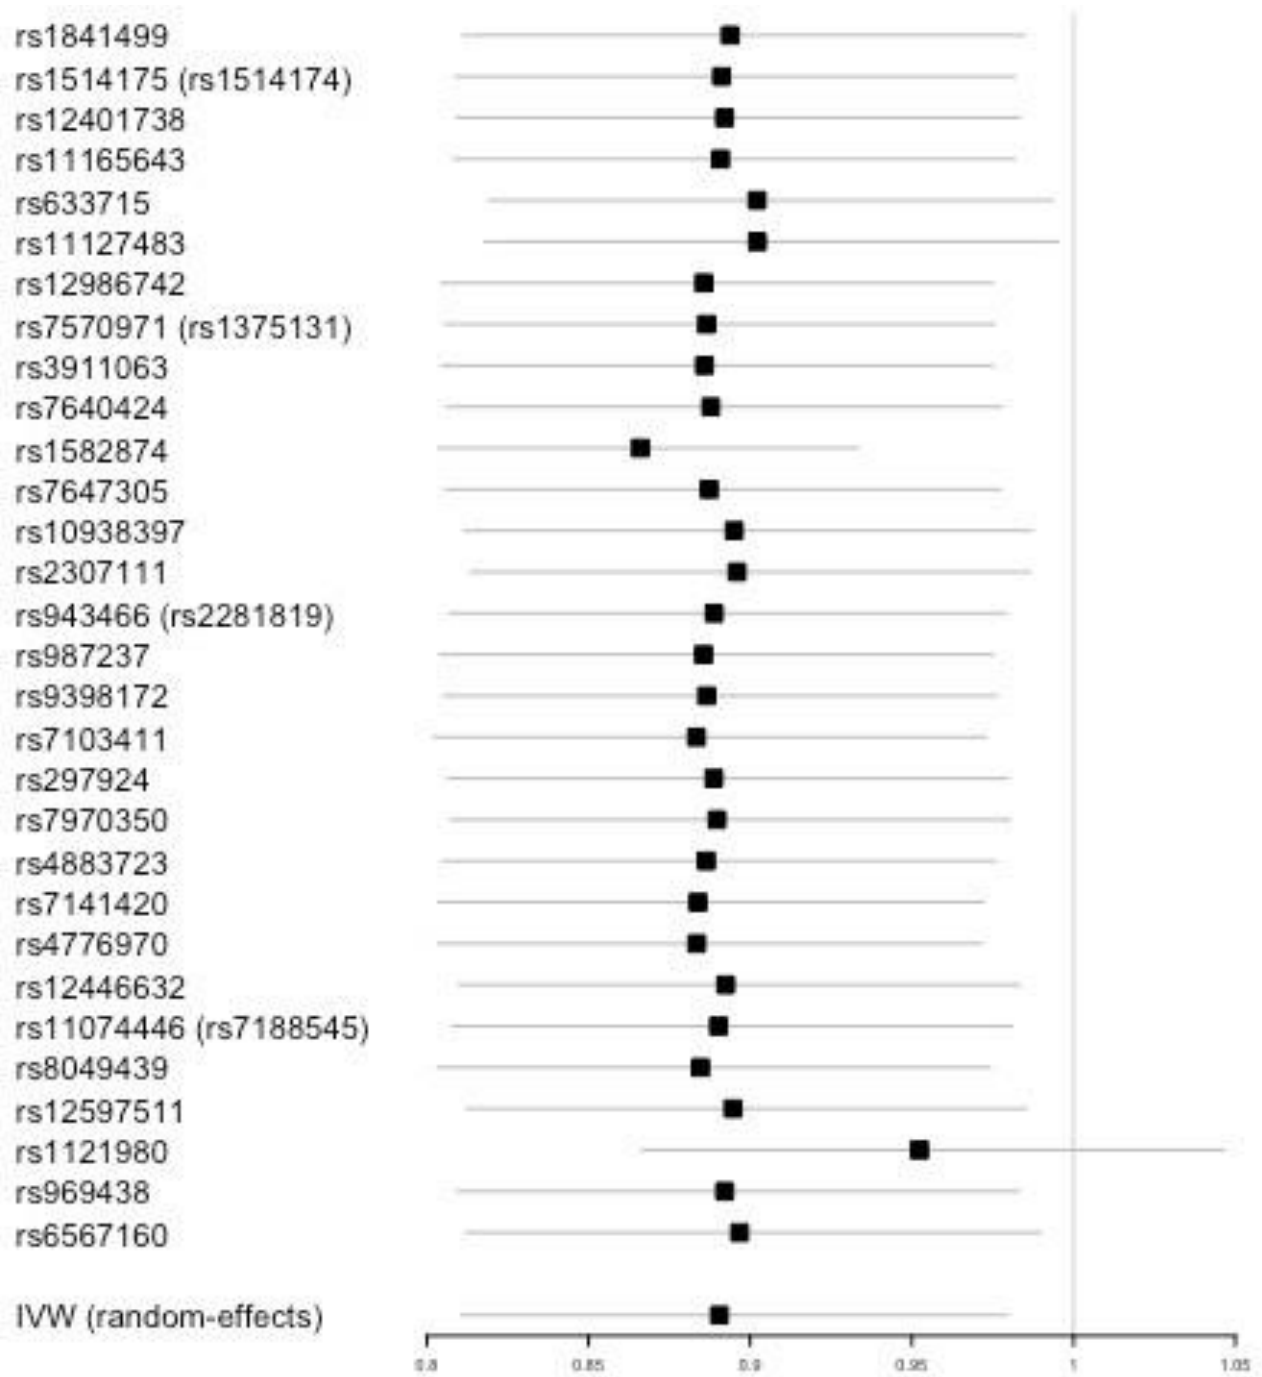

**Supplementary Figure S3.** Leave-one SNP-out plot for PC1 and overall breast cancer risk.

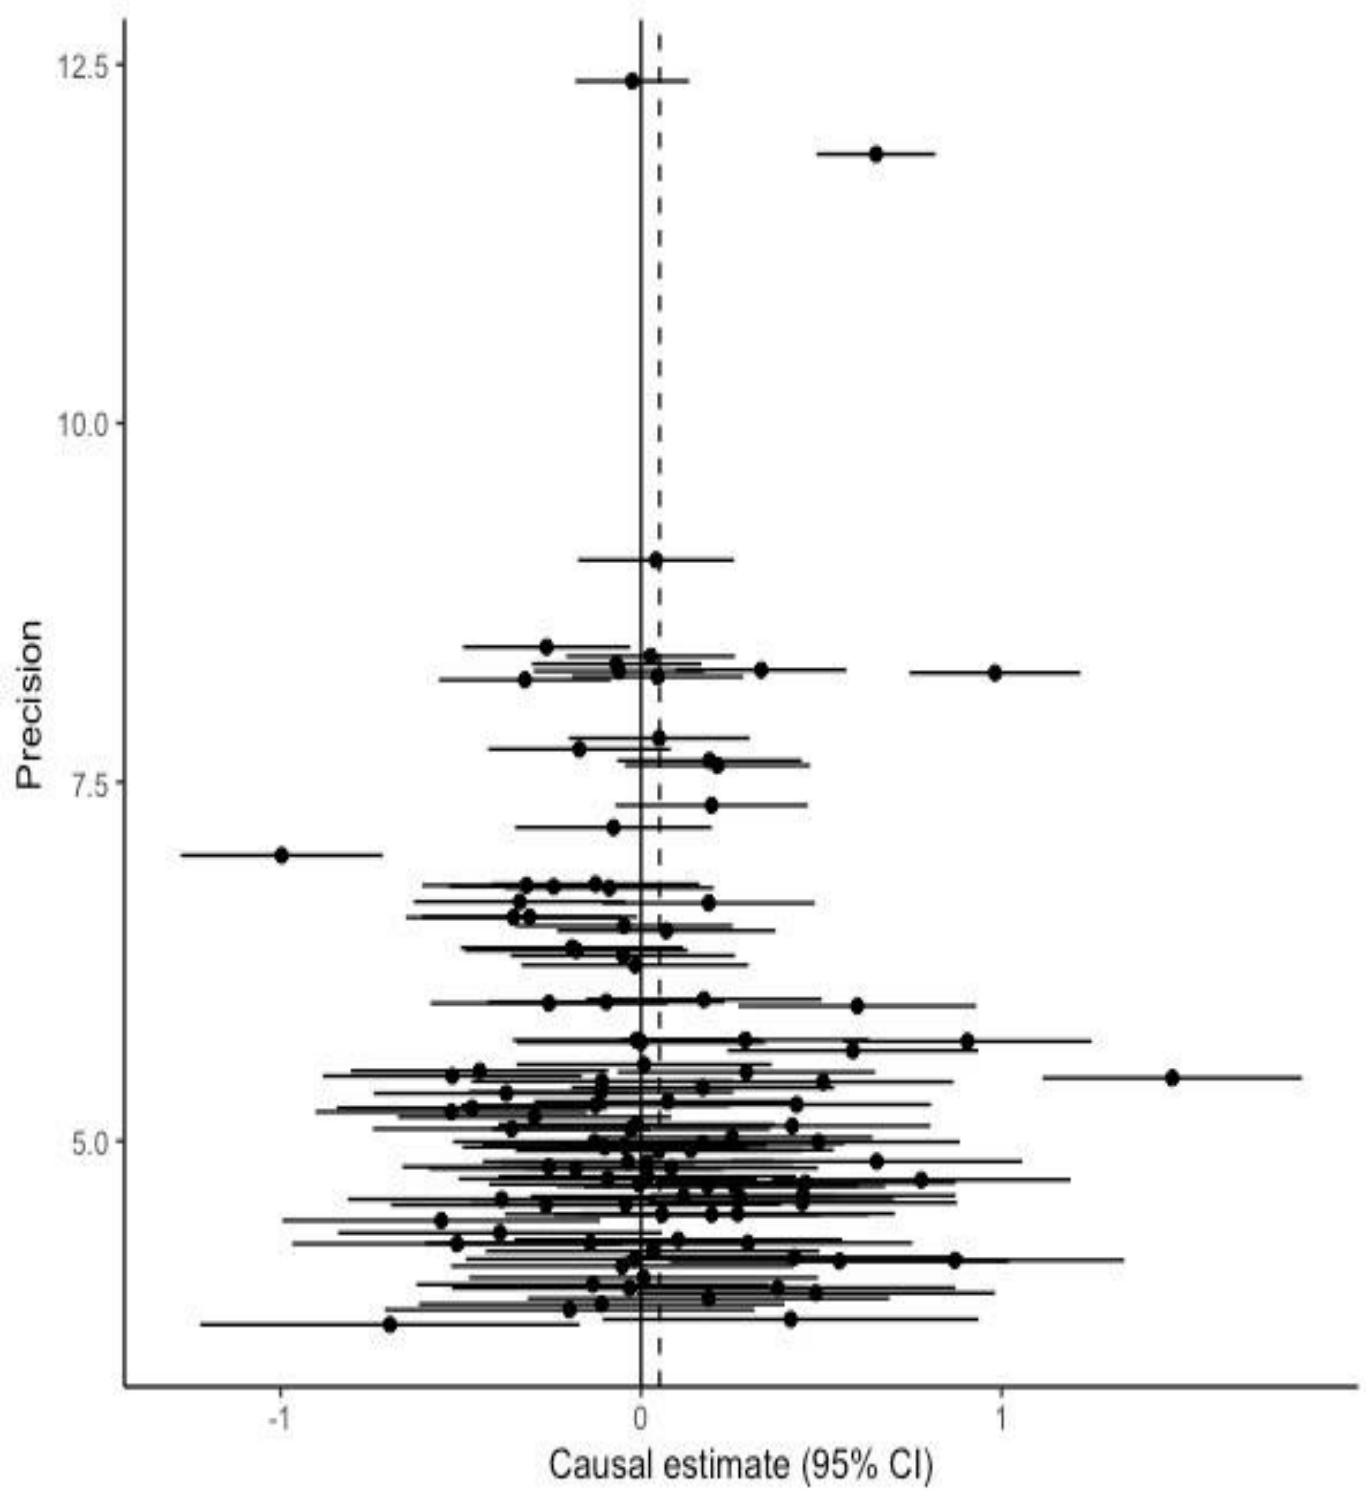

**Supplementary Figure S4.** Funnel plot for PC2 and overall breast cancer risk.

|                    | PC1    | PC2    | PC3    |
|--------------------|--------|--------|--------|
| BMI                | 0.473  | -0.128 | -0.284 |
| Height             | 0.131  | 0.803  | 0.513  |
| Hip                | 0.444  | 0.197  | -0.399 |
| Waist              | 0.488  | -0.159 | 0.138  |
| Weight             | 0.486  | 0.186  | -0.056 |
| WHR                | 0.297  | -0.490 | 0.689  |
| Explained variance | 64.37% | 18.46% | 13.79% |

**Supplementary Table S1.** Loadings and explained variance of the three PCs.<sup>1</sup>



| Breast cancer GWAS sample size          |                                      |                          |
|-----------------------------------------|--------------------------------------|--------------------------|
| Breast cancer                           | Overall                              | Sub-types                |
| Cases                                   | 133,384                              | 106,278 (invasive cases) |
| Controls                                | 113,789                              | 91,477                   |
| Tumor marker sub-types GWAS sample size |                                      |                          |
| Estrogen Receptor status                | Negative                             | 16883                    |
|                                         | Positive                             | 69963                    |
|                                         | Unknown                              | 19432                    |
| Progesterone Receptor status            | Negative                             | 24260                    |
|                                         | Positive                             | 51546                    |
|                                         | Unknown                              | 30472                    |
| HER2 status                             | Negative                             | 47645                    |
|                                         | Positive                             | 9502                     |
|                                         | Unknown                              | 49131                    |
| Grade                                   | 1                                    | 15566                    |
|                                         | 2                                    | 37532                    |
|                                         | 3                                    | 24360                    |
|                                         | Unknown                              | 28820                    |
| Breast cancer sub-types description     |                                      |                          |
| Luminal A                               | ER+ and/or PR+, HER2-, grade 1 and 2 |                          |
| Luminal B                               | ER+ and/or PR+, HER2+                |                          |
| HER2 +                                  | ER-, PR-, HER2+                      |                          |
| Triple -                                | ER-, PR-, HER2 -                     |                          |
| Luminal B/HER 2 -                       | ER+ and/or PR+, HER2-, grade 3       |                          |

**Supplementary Table S2.** Sample size for overall breast cancer and sub-types GWAS as well as according to tumor marker (Estrogen Receptor (negative, positive and unknown), Progesterone Receptor (negative, positive and unknown), HER2 (negative, positive and unknown), and grade (1, 2, 3 and unknown)). Finally, sub-types studied description regarding tumor markers.<sup>2</sup>

| Outcome              | Exposure | Heterogeneity |     |         | Egger intercept |                |         |
|----------------------|----------|---------------|-----|---------|-----------------|----------------|---------|
|                      |          | Cochran's Q   | df  | p-value | Estimate        | 95% CI         | p-value |
| Overall              | PC1      | 199.5858      | 29  | <0.001  | 0.029           | 0.014 , 0.043  | <0.001  |
|                      | PC2      | 515.5738      | 113 | <0.001  | 0               | -0.010 , 0.009 | 0.961   |
|                      | PC3      | 180.1254      | 43  | <0.001  | 0.013           | -0.008 , 0.033 | 0.228   |
| Luminal A            | PC1      | 136.8719      | 29  | <0.001  | 0.029           | 0.012 , 0.045  | 0.001   |
|                      | PC2      | 368.3768      | 113 | <0.001  | -0.006          | -0.017 , 0.004 | 0.256   |
|                      | PC3      | 129.4055      | 43  | <0.001  | 0.012           | -0.011 , 0.036 | 0.293   |
| Luminal B            | PC1      | 60.9838       | 29  | 0.0005  | 0.038           | 0.012 , 0.063  | 0.003   |
|                      | PC2      | 162.6251      | 113 | 0.0016  | 0.013           | -0.003 , 0.028 | 0.1     |
|                      | PC3      | 70.7185       | 43  | 0.0049  | 0.018           | -0.02 , 0.056  | 0.348   |
| HER2 +               | PC1      | 49.9252       | 29  | 0.0092  | 0.036           | 0.001 , 0.071  | 0.046   |
|                      | PC2      | 143.6335      | 113 | 0.0273  | -0.002          | -0.023 , 0.02  | 0.876   |
|                      | PC3      | 54.0215       | 43  | 0.1209  | 0.011           | -0.037 , 0.06  | 0.644   |
| Triple -             | PC1      | 45.7765       | 29  | 0.0247  | 0.029           | 0.01 , 0.048   | 0.003   |
|                      | PC2      | 187.1135      | 113 | <0.001  | 0.01            | -0.004 , 0.025 | 0.175   |
|                      | PC3      | 81.4148       | 43  | 0.0004  | -0.003          | -0.038 , 0.033 | 0.878   |
| Luminal B/<br>HER2 - | PC1      | 82.7505       | 29  | <0.001  | 0.038           | 0.013 , 0.063  | 0.003   |
|                      | PC2      | 183.9729      | 113 | <0.001  | -0.004          | -0.018 , 0.01  | 0.565   |
|                      | PC3      | 72.6526       | 43  | 0.0031  | 0.023           | -0.009 , 0.056 | 0.156   |

**Supplementary Table S3.** Heterogeneity test and Egger intercept results for body shape phenotypes and overall breast cancer risk and sub-types.

| Breast Cancer    | PC1                    | PC2                                                            | PC3                                                          |
|------------------|------------------------|----------------------------------------------------------------|--------------------------------------------------------------|
| Overall          | rs1582874<br>rs1121980 | rs11205303<br>rs724016<br>rs6569648<br>rs11049611<br>rs3764419 | rs9425301<br>rs6726261<br>rs9838625<br>rs272885<br>rs1936809 |
|                  | $\rho = 0.130$         | $\rho = 0.013$                                                 | $\rho = 0.123$                                               |
| Luminal A        | rs1582874<br>rs1121980 | rs11205303<br>rs724016<br>rs6569648<br>rs11049611<br>rs1182199 | rs9838625<br>rs272885<br>rs1516883                           |
|                  | $\rho = 0.053$         | $\rho = 0.020$                                                 | $\rho = 0.038$                                               |
| Luminal B        | rs3911063<br>rs1121980 | -                                                              | -                                                            |
|                  | $\rho = 0.039$         |                                                                |                                                              |
| HER2 +           | rs1582874              | -                                                              | -                                                            |
|                  | $\rho = 0.692$         |                                                                |                                                              |
| Triple -         | rs1121980              | rs6569648<br>rs11049611                                        | rs9425301                                                    |
|                  | $\rho = 0.007$         | $\rho = 0.769$                                                 | $\rho = 0.545$                                               |
| Luminal B/HER2 - | rs1582874<br>rs1121980 | rs1415288<br>rs724016<br>rs11049611                            | rs9838625                                                    |
|                  | $\rho = 0.334$         | $\rho = 0.204$                                                 | $\rho = 0.266$                                               |

**Supplementary Table S4.** Genetic variants considered as outliers for overall and subtypes breast cancer and each body shape phenotype. We also provide P-distortion ( $\rho$ ) for each test performed.

## References

1. Ried JS, Jeff JM, Chu AY, Bragg-Gresham JL, Van Dongen J, Huffman JE, et al. A principal component meta-analysis on multiple anthropometric traits identifies novel loci for body shape. *Nat Commun.* 2016;7.
2. Zhang H, Ahearn TU, Lecarpentier J, Barnes D, Beesley J, Qi G, et al. Genome-wide association study identifies 32 novel breast cancer susceptibility loci from overall and subtype-specific analyses. *Nat Genet.* 2020;52(6).
