# Supplementary material for: Body Shape Phenotypes and Breast Cancer Risk: A Mendelian Randomization Analysis
Source: MDPI journal article supplement (doi:10.3390/cancers15041296), 2023-02-17
Supplement: s1 [file s1]

# Supplementary File 1: Genetic variants and associated traits in previous GWAS ( $p < 5 \times 10^{-8}$ )

| PC1            |                                                                                               |
|----------------|-----------------------------------------------------------------------------------------------|
| SNP (lead SNP) | Trait                                                                                         |
| rs1841499      | Age at menarche                                                                               |
|                | Alcohol intake versus 10 years previously                                                     |
|                | Ambidextrous                                                                                  |
|                | Basal metabolic rate                                                                          |
|                | Body fat percentage                                                                           |
|                | BMI                                                                                           |
|                | Fluid intelligence score                                                                      |
|                | Hayfever, allergic rhinitis or eczema                                                         |
|                | Hip circumference                                                                             |
|                | Impedance                                                                                     |
|                | Long-standing illness, disability or infirmity                                                |
|                | Medication for cholesterol, blood pressure or diabetes: none of the above                     |
|                | No blood clot, bronchitis, emphysema, asthma, rhinitis, eczema or allergy diagnosed by doctor |
|                | Number of self-reported non-cancer illnesses                                                  |
|                | Number of treatments or medications taken                                                     |
|                | Obesity class 1                                                                               |
|                | Obesity class 2                                                                               |
|                | Obesity class 3                                                                               |
|                | Overweight                                                                                    |
|                | Pulse rate                                                                                    |
|                | Qualifications: college or university degree                                                  |
|                | Qualifications: none                                                                          |
|                | Qualifications: other professional qualifications                                             |
|                | Relative age of first facial hair                                                             |
|                | Seen doctor for nerves, anxiety, tension or depression                                        |
|                | Sodium in urine                                                                               |

|                       |                                                                                                                                                                                                                                                                                                                                                                                                                                                                                                     |
|-----------------------|-----------------------------------------------------------------------------------------------------------------------------------------------------------------------------------------------------------------------------------------------------------------------------------------------------------------------------------------------------------------------------------------------------------------------------------------------------------------------------------------------------|
|                       | Types of transport used, excluding work: public transport<br>Waist circumference<br>Weight<br>Whole body fat mass<br>Whole body fat-free mass<br>Whole body water mass<br>Years of educational attainment                                                                                                                                                                                                                                                                                           |
| rs1514175 (rs1514174) | Age at menarche<br>Basal metabolic rate<br>BMI<br>Childhood BMI<br>Childhood obesity<br>Ever smoked<br>Extreme obesity body mass index<br>Extreme obesity with early age of onset<br>Hip circumference<br>Impedance<br>Obesity class 1<br>Obesity with early age of onset age 2<br>Overweight<br>Past tobacco smoking<br>Relative age of first facial hair<br>Relative age voice broke<br>Waist circumference<br>Weight<br>Whole body fat mass<br>Whole body fat-free mass<br>Whole body water mass |
|                       | Basal metabolic rate<br>BMI<br>Body fat percentage<br>Height                                                                                                                                                                                                                                                                                                                                                                                                                                        |

|            |                                                                                                                                                                                                                                                        |
|------------|--------------------------------------------------------------------------------------------------------------------------------------------------------------------------------------------------------------------------------------------------------|
| rs12401738 | Hip circumference<br>Impedance<br>Waist circumference<br>Weight<br>Whole body fat mass<br>Whole body fat-free mass<br>Whole body water mass<br>Years of educational attainment                                                                         |
| rs11165643 | Basal metabolic rate<br>BMI<br>Body fat percentage<br>Hip circumference<br>Treatment with olmesartan<br>Waist circumference<br>Weight<br>Whole body fat mass<br>Whole body fat-free mass<br>Whole body water mass                                      |
| rs633715   | Age at menarche<br>Basal metabolic rate<br>BMI<br>Body fat percentage<br>Childhood BMI<br>Childhood obesity<br>Hip circumference<br>Impedance<br>Menarche<br>Menarche age at onset<br>Obesity<br>Obesity class 1<br>Obesity class 2<br>Obesity class 3 |

|            |                                                                                                                                                                                                                                                                                                                                                                                                                                                                                                                             |
|------------|-----------------------------------------------------------------------------------------------------------------------------------------------------------------------------------------------------------------------------------------------------------------------------------------------------------------------------------------------------------------------------------------------------------------------------------------------------------------------------------------------------------------------------|
|            | Obesity with early age of onset age 2<br>Overweight<br>Relative age of first facial hair<br>Waist circumference<br>Waist hip ratio<br>Weight<br>Whole body fat mass<br>Whole body fat-free mass<br>Whole body water mass                                                                                                                                                                                                                                                                                                    |
| rs11127483 | Age at menarche<br>Basal metabolic rate<br>BMI<br>Body fat percentage<br>Childhood BMI<br>Childhood obesity<br>Diastolic blood pressure<br>Heel bone mineral density<br>Hip circumference<br>Impedance<br>Obesity class 1<br>Obesity class 2<br>Obesity class 3<br>Obesity with early age of onset age 2<br>Overweight<br>Past tobacco smoking<br>Relative age of first facial hair<br>Systolic blood pressure<br>Waist circumference<br>Weight<br>Whole body fat mass<br>Whole body fat-free mass<br>Whole body water mass |

|                       |                                                                                                                                                                                                                                                                                                                                                                                                          |
|-----------------------|----------------------------------------------------------------------------------------------------------------------------------------------------------------------------------------------------------------------------------------------------------------------------------------------------------------------------------------------------------------------------------------------------------|
| rs12986742            | Basal metabolic rate<br>BMI<br>Body fat percentage<br>Getting up in morning<br>Hip circumference<br>Impedance<br>Waist circumference<br>Weight<br>Whole body fat mass<br>Whole body fat-free mass<br>Whole body water mass                                                                                                                                                                               |
| rs7570971 (rs1375131) | Blood metabolite levels<br>BMI<br>Body fat percentage<br>Cholesterol<br>Forced expiratory volume in 1 sec<br>Forced vital capacity<br>Hand grip strength<br>Height<br>Hip circumference<br>LDL<br>Low density lipoprotein<br>Monocyte percentage of white cells<br>Parkinsons disease<br>Sleep duration<br>Total cholesterol<br>Type II diabetes<br>Waist circumference<br>Weight<br>Whole body fat mass |
|                       | Basal metabolic rate                                                                                                                                                                                                                                                                                                                                                                                     |

|           |                                                                                                                                                                                                                                                                                                                                                                                                                                             |
|-----------|---------------------------------------------------------------------------------------------------------------------------------------------------------------------------------------------------------------------------------------------------------------------------------------------------------------------------------------------------------------------------------------------------------------------------------------------|
| rs3911063 | BMI<br>Body fat percentage<br>Ever smoked<br>Hip circumference<br>Impedance<br>Past tobacco smoking<br>Qualifications: A levels or as levels or equivalent<br>Qualifications: college or university degree<br>Qualifications: other professional qualifications<br>Smoking status: previous<br>Waist circumference<br>Weight<br>Whole body fat mass<br>Whole body fat-free mass<br>Whole body water mass<br>Years of educational attainment |
| rs7640424 | BMI<br>Hip circumference<br>Impedance<br>Qualifications: A levels or as levels or equivalent<br>Years of educational attainment                                                                                                                                                                                                                                                                                                             |
|           | Allergic disease<br>Basal metabolic rate<br>Birth weight of first child<br>Body fat percentage<br>Ever had prostate specific antigen test<br>Forced expiratory volume in 1 sec<br>Forced vital capacity<br>Hair or balding pattern<br>Hand grip strength<br>Hayfever, allergic rhinitis or eczema<br>Heel bone mineral density                                                                                                              |

|           |                                                                                                                                                                                                                                                                                                                                                                                                                                                                                                                                   |
|-----------|-----------------------------------------------------------------------------------------------------------------------------------------------------------------------------------------------------------------------------------------------------------------------------------------------------------------------------------------------------------------------------------------------------------------------------------------------------------------------------------------------------------------------------------|
| rs1582874 | Height<br>Hip circumference<br>Lymphocyte percentage of white cells<br>Mean corpuscular hemoglobin<br>Mean corpuscular volume<br>Myopia<br>Neutrophil percentage of white cells<br>No blood clot, bronchitis, emphysema, asthma, rhinitis, eczema or allergy diagnosed by doctor<br>Potassium in urine<br>Pulse rate<br>Red blood cell count<br>Relative age of first facial hair<br>Self-reported enlarged prostate<br>Waist circumference<br>Weight<br>Whole body fat mass<br>Whole body fat-free mass<br>Whole body water mass |
| rs7647305 | Basal metabolic rate<br>BMI<br>Hip circumference<br>Impedance<br>Obesity class 1<br>Obesity class 2<br>Overweight<br>Waist circumference<br>Weight<br>Whole body fat mass<br>Whole body fat-free mass<br>Whole body water mass                                                                                                                                                                                                                                                                                                    |
|           | Age at menarche<br>Basal metabolic rate                                                                                                                                                                                                                                                                                                                                                                                                                                                                                           |

rs10938397

BMI  
Body fat percentage  
Childhood BMI  
Childhood obesity  
Extreme obesity with early age of onset  
Hip circumference  
Impedance  
log Fast insulin  
Menarche age at onset  
Obesity  
Obesity class 1  
Obesity class 2  
Obesity class 3  
Obesity with early age of onset age 2  
Overweight  
Relative age voice broke  
Waist circumference  
Waist hip ratio  
Weight  
Whole body fat mass  
Whole body fat-free mass  
Whole body water mass

Basal metabolic rate  
BMI  
Body fat percentage  
Diabetes diagnosed by doctor  
Diastolic blood pressure  
Hip circumference  
Impedance  
LDL cholesterol  
Low density lipoprotein  
Obesity



|                      |                                                                                                                                                                                                                                                                                                                                                                  |
|----------------------|------------------------------------------------------------------------------------------------------------------------------------------------------------------------------------------------------------------------------------------------------------------------------------------------------------------------------------------------------------------|
| rs2307111            | Obesity class 1<br>Obesity class 2<br>Overweight<br>Pain type experienced in last month: headache<br>Platelet count<br>Pulse rate<br>Self-reported diabetes<br>Self-reported high cholesterol<br>Snoring<br>Total cholesterol<br>Usual walking pace<br>Waist circumference<br>Weight<br>Whole body fat mass<br>Whole body fat-free mass<br>Whole body water mass |
| rs943466 (rs2281819) | BMI<br>Body fat percentage<br>Hip circumference<br>Pack years adult smoking as proportion of life span exposed to smoking<br>Platelet count<br>Plateletcrit<br>Pulse rate<br>Waist circumference<br>Whole body fat mass                                                                                                                                          |
|                      | Adiposity<br>Age at menarche<br>Basal metabolic rate<br>BMI<br>Body fat percentage<br>Childhood BMI<br>Diabetes diagnosed by doctor                                                                                                                                                                                                                              |

rs987237

Extreme obesity with early age of onset  
Getting up in morning  
Hip circumference  
Impedance  
Medication for cholesterol, blood pressure or diabetes: blood pressure medication  
Medication for cholesterol, blood pressure or diabetes: none of the above  
Morning or evening person  
Obesity class 1  
Obesity class 2  
Obesity class 3  
Overweight  
Self-reported diabetes  
Treatment with metformin  
Waist circumference  
Waist hip ratio  
Weight  
Whole body fat mass  
Whole body fat-free mass  
Whole body water mass

rs9398172

Age at menarche  
Basal metabolic rate  
BMI  
Fluid intelligence score  
Height  
High light scatter percentage of red cells  
Hip circumference  
Impedance  
Intelligence  
Intracranial volume  
Mean time to correctly identify matches  
Number of days or week of vigorous physical activity 10+ minutes  
Peak expiratory flow

|                       |                                                                                                                                                                                                                                                                                                                                                                                                       |
|-----------------------|-------------------------------------------------------------------------------------------------------------------------------------------------------------------------------------------------------------------------------------------------------------------------------------------------------------------------------------------------------------------------------------------------------|
|                       | <p>Qualifications: college or university degree</p> <p>Qualifications: none</p> <p>Relative age of first facial hair</p> <p>Schizophrenia</p> <p>Waist circumference</p> <p>Weight</p> <p>Whole body fat mass</p> <p>Whole body fat-free mass</p> <p>Whole body water mass</p>                                                                                                                        |
| rs4536164 (rs4514364) | <p>Age at menarche</p> <p>Basal metabolic rate</p> <p>BMI</p> <p>Body fat percentage</p> <p>Hip circumference</p> <p>Impedance</p> <p>Lumbar spine bone mineral density in females</p> <p>Obesity class 1</p> <p>Overweight</p> <p>Survival in pancreatic cancer</p> <p>Waist circumference</p> <p>Weight</p> <p>Whole body fat mass</p> <p>Whole body fat-free mass</p> <p>Whole body water mass</p> |
|                       | <p>Age at menarche</p> <p>Basal metabolic rate</p> <p>BMI</p> <p>Body fat percentage</p> <p>Childhood BMI</p> <p>Coronary artery disease</p> <p>Ever smoked</p> <p>Falls in the last year</p>                                                                                                                                                                                                         |

rs7103411

Forced vital capacity  
Hip circumference  
Impedance  
Menarche age at onset  
Obesity class 1  
Obesity class 2  
Overweight  
Past tobacco smoking  
Relative age of first facial hair  
Relative age voice broke  
Snoring  
Waist circumference  
Waist hip ratio  
Weight  
Whole body fat mass  
Whole body fat-free mass  
Whole body water mass

rs297924

Age at menarche  
Basal metabolic rate  
BMI  
Body fat percentage  
Childhood BMI  
Childhood obesity  
Hip circumference  
Home area population density: Scotland large urban area  
Impedance  
Obesity  
Obesity class 1  
Obesity class 2  
Obesity with early age of onset age 2  
Waist circumference  
Weight

|           |                                                    |
|-----------|----------------------------------------------------|
|           | Whole body fat mass                                |
|           | Whole body fat-free mass                           |
|           | Whole body water mass                              |
| rs7970350 | Alcohol intake frequency                           |
|           | Basal metabolic rate                               |
|           | Birth weight                                       |
|           | Birth weight of first child                        |
|           | Birthlength                                        |
|           | BMI in males less than or equal to 50 years of age |
|           | Diabetes diagnosed by doctor                       |
|           | Forced expiratory volume in 1 sec                  |
|           | Forced vital capacity                              |
|           | Hand grip strength                                 |
|           | Height                                             |
|           | Hip circumference                                  |
|           | Impedance                                          |
|           | Infant head circumference                          |
|           | Infant length                                      |
|           | Maternal effects on offspring birthweight          |
|           | Number of self-reported non-cancer illnesses       |
|           | Overall health rating                              |
|           | Peak expiratory flow                               |
|           | Pulse rate                                         |
|           | Self-reported diabetes                             |
|           | Self-reported high cholesterol                     |
|           | Systolic blood pressure                            |
|           | Treatment with metformin                           |
|           | Waist circumference                                |
|           | Weight                                             |
|           | Whole body fat mass                                |
|           | Whole body fat-free mass                           |
|           | Whole body water mass                              |

|           |                                                                                                                                                                                                                                                                                                        |
|-----------|--------------------------------------------------------------------------------------------------------------------------------------------------------------------------------------------------------------------------------------------------------------------------------------------------------|
| rs4883723 | Basal metabolic rate<br>BMI<br>Body fat percentage<br>Childhood BMI<br>Childhood obesity<br>Hip circumference<br>Leg impedance<br>Obesity with early age of onset age 2<br>Waist circumference<br>Weight<br>Whole body fat mass<br>Whole body fat-free mass<br>Whole body water mass                   |
| rs7141420 | Basal metabolic rate<br>BMI<br>Body fat percentage<br>Hip circumference<br>Impedance<br>Obesity<br>Obesity class 1<br>Obesity class 2<br>Overweight<br>Sodium in urine<br>Waist circumference<br>Waist hip ratio<br>Weight<br>Whole body fat mass<br>Whole body fat-free mass<br>Whole body water mass |
|           | Age at menarche<br>Basal metabolic rate                                                                                                                                                                                                                                                                |

rs4776970

BMI  
Body fat percentage  
Diastolic blood pressure  
Hip circumference  
Impedance  
Obesity class 1  
Obesity class 2  
Overweight  
Past tobacco smoking  
Vascular or heart problems diagnosed by doctor: high blood pressure  
Vascular or heart problems diagnosed by doctor: none of the above  
Waist circumference  
Waist hip ratio  
Weight  
Whole body fat mass  
Whole body fat-free mass  
Whole body water mass

rs12446632

Age at menarche  
Basal metabolic rate  
BMI  
Childhood BMI  
Hand grip strength  
Heel bone mineral density  
High density lipoprotein  
Hip circumference  
Impedance  
Menarche age at onset  
Obesity  
Obesity class 1  
Obesity class 2  
Overweight  
Waist circumference

|                        |                                                                                                                                                                                                                                                                                                                                                                                                                                                                 |
|------------------------|-----------------------------------------------------------------------------------------------------------------------------------------------------------------------------------------------------------------------------------------------------------------------------------------------------------------------------------------------------------------------------------------------------------------------------------------------------------------|
|                        | Weight<br>Whole body fat mass<br>Whole body fat-free mass<br>Whole body water mass                                                                                                                                                                                                                                                                                                                                                                              |
| rs11074446 (rs7188545) | Basal metabolic rate<br>BMI<br>Body fat percentage<br>Hip circumference<br>Impedance<br>Overweight<br>Waist circumference<br>Whole body fat mass<br>Whole body fat-free mass<br>Whole body water mass                                                                                                                                                                                                                                                           |
| rs8049439              | Alcohol intake frequency<br>Basal metabolic rate<br>BMI<br>Body fat percentage<br>Crohns disease<br>Educational attainment<br>Fluid intelligence score<br>Gene expression<br>Hand grip strength<br>Hip circumference<br>Inflammatory bowel disease<br>Inflammatory bowel disease early onset<br>Intelligence<br>Intelligence multi trait analysis<br>Leg impedance<br>Mean corpuscular volume<br>Nonsyndromic striar distensae stretch marks<br>Obesity class 1 |



rs12597511

Obesity class 2  
Overweight  
Qualifications: college or university degree  
Qualifications: none  
Red blood cell count  
Suffer from nerves  
Types of physical activity in last 4 weeks: light diy  
Usual walking pace  
Waist circumference  
Waist hip ratio  
Weight  
Whole body fat mass  
Whole body fat-free mass  
Whole body water mass  
Years of educational attainment  
Alcohol intake frequency  
Basal metabolic rate  
BMI  
Body fat percentage  
Diastolic blood pressure  
Dose change in phenprocoumon warfarin in mgweek per allele  
Forced expiratory volume in 1 sec  
Forced vital capacity  
Hip circumference  
Illnessess of siblings: high blood pressure  
Illnessess of siblings: none of the above  
Impedance  
Lymphocyte count  
Mean corpuscular hemoglobin  
Mean corpuscular volume  
Nervous feelings  
Number of incorrect marches in round

Overall health rating  
Self-reported hypertension  
Snoring  
Time spent watching tv  
Types of physical activity in last 4 weeks: walking for pleasure  
Usual walking pace  
Vascular or heart problems diagnosed by doctor: high blood pressure  
Vascular or heart problems diagnosed by doctor: none of the above  
Waist circumference  
Weight  
Whole body fat mass  
Whole body fat-free mass  
Whole body water mass

Age at menarche  
Alcohol intake frequency  
Average weekly beer plus cider intake  
Average weekly red wine intake  
Average weekly spirits intake  
Basal metabolic rate  
BMI  
Body fat percentage  
Childhood BMI  
Childhood obesity  
Creatinine in urine  
Cystatin C in serum  
Diabetes diagnosed by doctor  
Extreme obesity with early age of onset  
Getting up in morning  
HbA1c  
HDL cholesterol  
Heel bone mineral density  
High density lipoprotein

rs1121980

Hip circumference  
Illnesses of father: diabetes  
Illnesses of mother: diabetes  
Illnesses of siblings: high blood pressure  
Impedance  
log Fast insulin  
log Leptin  
Medication for cholesterol, blood pressure or diabetes: blood pressure medication  
Medication for cholesterol, blood pressure or diabetes: none of the above  
Morning or evening person  
Number of treatments or medications taken  
Obesity  
Obesity class 1  
Obesity class 2  
Obesity class 3  
Obesity early onset extreme  
Obesity with early age of onset age 2  
Overall health rating  
Overweight  
Relative age of first facial hair  
Relative age voice broke  
Self-reported breast cancer  
Self-reported diabetes  
Self-reported hypertension  
Sleep duration  
Snoring  
Sodium in urine  
Treatment with bendroflumethiazide  
Treatment with blood pressure medication  
Treatment with gliclazide  
Treatment with metformin  
Triglycerides

|          |                                                                                                                                                                                                                                                                                                                                                                                     |
|----------|-------------------------------------------------------------------------------------------------------------------------------------------------------------------------------------------------------------------------------------------------------------------------------------------------------------------------------------------------------------------------------------|
|          | Type II diabetes<br>Type II diabetes combined control dataset<br>Usual walking pace<br>Vascular or heart problems diagnosed by doctor: high blood pressure<br>Vascular or heart problems diagnosed by doctor: none of the above<br>Waist circumference<br>Waist hip ratio<br>Weight<br>Whole body fat mass<br>Whole body fat-free mass<br>Whole body water mass                     |
| rs969438 | BMI<br>Obesity class 1<br>Trunk fat percentage<br>Waist circumference<br>Weight                                                                                                                                                                                                                                                                                                     |
|          | Alcohol intake frequency<br>Antipsychotic drug induced weight gain<br>Basal metabolic rate<br>BMI<br>Body fat percentage<br>Childhood BMI<br>Childhood obesity<br>Coronary artery disease<br>Diabetes diagnosed by doctor<br>Fat body mass<br>Forced expiratory volume in 1 sec<br>Hand grip strength<br>HDL cholesterol<br>Height<br>High density lipoprotein<br>Hip circumference |

rs6567160

Impedance  
Myocardial infarction  
Nervous feelings  
Obesity class 1  
Obesity class 2  
Obesity with early age of onset age 2  
Overweight  
Self-reported diabetes  
Suffer from nerves  
Treatment with levothyroxine sodium  
Type II diabetes  
Vascular or heart problems diagnosed by doctor: high blood pressure  
Vascular or heart problems diagnosed by doctor: none of the above  
Waist circumference  
Waist hip ratio  
Weight  
Whole body fat mass  
Whole body fat-free mass  
Whole body water mass  
Worrier or anxious feelings

| PC2            |                                                                                                                                                                                                                                 |
|----------------|---------------------------------------------------------------------------------------------------------------------------------------------------------------------------------------------------------------------------------|
| SNP (lead SNP) | Trait                                                                                                                                                                                                                           |
| rs2284746      | BMI<br>Forced vital capacity<br>Gene expression<br>Height<br>Hematocrit<br>Hip circumference<br>Impedance<br>Pulmonary function<br>Waist circumference<br>Whole body fat-free mass<br>Whole body water mass                     |
| rs2903545      | Hand grip strength<br>Height<br>Hip circumference<br>Sum eosinophil basophil counts<br>Trunk fat-free mass<br>Whole body fat-free mass<br>Whole body water mass                                                                 |
| rs11209376     | Creatinine in urine<br>Diastolic blood pressure<br>Forced expiratory volume in 1 sec<br>Forced vital capacity<br>Hand grip strength<br>Heel bone mineral density<br>Height<br>Hip circumference<br>Potassium in urine<br>Weight |

|            |                                                                                                                                                                                                                                                                                                                                                                         |
|------------|-------------------------------------------------------------------------------------------------------------------------------------------------------------------------------------------------------------------------------------------------------------------------------------------------------------------------------------------------------------------------|
|            | Whole body fat-free mass<br>Whole body water mass                                                                                                                                                                                                                                                                                                                       |
| rs17391694 | Alcohol intake frequency<br>Basal metabolic rate<br>BMI<br>Creatinine in urine<br>Crohns disease<br>Forced vital capacity<br>Height<br>Hip circumference<br>Impedance<br>Leg fat percentage<br>Lung cancer<br>Mean corpuscular hemoglobin concentration<br>Time spent watching tv<br>Waist circumference<br>Weight<br>Whole body fat-free mass<br>Whole body water mass |
| rs7536458  | Basal metabolic rate<br>Forced expiratory volume in 1 sec<br>Hair or balding pattern<br>Height<br>Hip circumference<br>Infant length<br>Leg impedance<br>Trunk fat-free mass<br>Waist circumference<br>Waist hip ratio<br>Whole body fat-free mass<br>Whole body water mass                                                                                             |

|                       |                                                                                                                                                                                                                                                                                                                                                                                                                                                                                                                                                        |
|-----------------------|--------------------------------------------------------------------------------------------------------------------------------------------------------------------------------------------------------------------------------------------------------------------------------------------------------------------------------------------------------------------------------------------------------------------------------------------------------------------------------------------------------------------------------------------------------|
| rs11205303            | <p> Basal metabolic rate<br/> Body fat percentage<br/> Breast cancer<br/> Coronary artery disease<br/> Forced expiratory volume in 1 sec<br/> Forced vital capacity<br/> Forced vital capacity<br/> Granulocyte percentage of myeloid white cells<br/> Heel bone mineral density<br/> Height<br/> Hip circumference<br/> Hip circumference<br/> Impedance<br/> Infant length<br/> Trunk fat mass<br/> Trunk fat percentage<br/> Waist circumference<br/> Weight<br/> Whole body fat mass<br/> Whole body fat-free mass<br/> Whole body water mass </p> |
| rs1752388 (rs2298265) | <p>Height</p>                                                                                                                                                                                                                                                                                                                                                                                                                                                                                                                                          |
| rs905938              | <p> Basal metabolic rate<br/> Birth length<br/> Birth weight<br/> BMI<br/> Eosinophil percentage of granulocytes<br/> Hayfever, allergic rhinitis or eczema<br/> Height<br/> Hip circumference<br/> Impedance </p>                                                                                                                                                                                                                                                                                                                                     |



|            |                                                                                                                                                                                                                                                                                                                                                                  |
|------------|------------------------------------------------------------------------------------------------------------------------------------------------------------------------------------------------------------------------------------------------------------------------------------------------------------------------------------------------------------------|
|            | Neutrophil percentage of granulocytes<br>Sum eosinophil basophil counts<br>Trunk fat-free mass<br>Waist circumference<br>Waist hip ratio<br>Weight<br>Whole body fat-free mass<br>Whole body water mass                                                                                                                                                          |
| rs11584955 | Basal metabolic rate<br>Forced expiratory volume in 1 sec<br>Forced vital capacity<br>Hair or balding pattern<br>Heel bone mineral density<br>Height<br>Hematocrit<br>Hemoglobin concentration<br>Hip circumference<br>Mean platelet volum<br>Platelet distribution width<br>Red blood cell count<br>Weight<br>Whole body fat-free mass<br>Whole body water mass |
| rs1014719  | Basal metabolic rate<br>Forced expiratory volume in 1 sec<br>Forced vital capacity<br>Hand grip strength<br>Height<br>Impedance<br>Weight<br>Whole body fat-free mass                                                                                                                                                                                            |

|           |                                                                                                                                                                                                                                                                                                                                   |
|-----------|-----------------------------------------------------------------------------------------------------------------------------------------------------------------------------------------------------------------------------------------------------------------------------------------------------------------------------------|
|           | Whole body water mass                                                                                                                                                                                                                                                                                                             |
| rs1046934 | Basal metabolic rate<br>Forced expiratory volume in 1 sec<br>Forced vital capacity<br>Gene expression<br>Hand grip strength<br>Height<br>Hip circumference<br>Impedance<br>Myopia<br>Waist circumference<br>Weight<br>Whole body fat-free mass<br>Whole body water mass                                                           |
| rs1415288 | Adiponectin levels<br>Body fat percentage<br>Coxarthrosis<br>Falls in the last year<br>Femoral hernia<br>Height<br>Hip circumference<br>Impedance<br>Inguinal hernia<br>Trunk fat percentage<br>Type II diabetes<br>Umbilical hernia<br>Ventral hernia<br>Waist circumference<br>Waist hip ratio<br>Weight<br>Whole body fat mass |

|                         |                                                                                                                                                                                                                 |
|-------------------------|-----------------------------------------------------------------------------------------------------------------------------------------------------------------------------------------------------------------|
| rs12093031 (rs10799424) | Forced expiratory volume in 1 sec<br>Forced vital capacity<br>Hand grip strength<br>Height<br>Hip circumference<br>Impedance<br>Trunk fat-free mass<br>Waist circumference                                      |
| rs2278483               | BMI<br>Body fat percentage<br>Childhood BMI<br>Forced vital capacity<br>Hand grip strength<br>Height<br>Hip circumference<br>Trunk fat-free mass<br>Waist circumference                                         |
| rs2289195               | Basal metabolic rate<br>Forced expiratory volume in 1 sec<br>Forced vital capacity<br>Hand grip strength<br>Height<br>Leg impedance<br>Waist circumference<br>Whole body fat-free mass<br>Whole body water mass |
|                         | Basal metabolic rate<br>Forced expiratory volume in 1 sec<br>Height                                                                                                                                             |

|           |                                                                                                                                                                                                                                                                                                                          |
|-----------|--------------------------------------------------------------------------------------------------------------------------------------------------------------------------------------------------------------------------------------------------------------------------------------------------------------------------|
| rs1545552 | Hip circumference<br>Hip circumference<br>Weight<br>Whole body fat-free mass<br>Whole body water mass                                                                                                                                                                                                                    |
| rs6740539 | Height                                                                                                                                                                                                                                                                                                                   |
| rs3791675 | Basal metabolic rate<br>Forced expiratory volume in 1 sec<br>Forced vital capacity<br>Height<br>Hip circumference<br>Impedance<br>Inguinal hernia<br>Mononeuropathies of upper limb<br>Peak expiratory flow<br>Waist circumference<br>Weight<br>Whole body fat mass<br>Whole body fat-free mass<br>Whole body water mass |
| rs1913671 | Getting up in morning<br>Height<br>Hip circumference<br>Trunk fat-free mass<br>Waist circumference<br>Whole body fat-free mass                                                                                                                                                                                           |
|           | Basal metabolic rate<br>Height<br>Hip circumference                                                                                                                                                                                                                                                                      |

|           |                                                                                                                                                                                   |
|-----------|-----------------------------------------------------------------------------------------------------------------------------------------------------------------------------------|
| rs1478576 | Impedance<br>Weight<br>Whole body fat mass<br>Whole body fat-free mass<br>Whole body water mass                                                                                   |
| rs3103267 | Basal metabolic rate<br>Forced expiratory volume in 1 sec<br>Forced vital capacity<br>Height<br>Waist circumference<br>Whole body fat-free mass<br>Whole body water mass          |
| rs2270894 | Basal metabolic rate<br>Birth weight<br>Forced vital capacity<br>Height<br>Hip circumference<br>Weight<br>Whole body fat-free mass<br>Whole body water mass                       |
| rs2581830 | Arm impedance<br>Birth weight<br>BMI<br>Crohns disease<br>Forced vital capacity<br>Hand grip strength<br>Height<br>Hip circumference<br>Trunk fat-free mass<br>Usual walking pace |

|           |                                                                                                                                                                                                                                                                                                                                                                                                                                                                   |
|-----------|-------------------------------------------------------------------------------------------------------------------------------------------------------------------------------------------------------------------------------------------------------------------------------------------------------------------------------------------------------------------------------------------------------------------------------------------------------------------|
| rs9833926 | <p>Basal metabolic rate</p> <p>Hayfever, allergic rhinitis or eczema</p> <p>Heel bone mineral density</p> <p>Height</p> <p>Hematocrit</p> <p>Hemoglobin concentration</p> <p>Hip circumference</p> <p>Lymphocyte count</p> <p>No blood clot, bronchitis, emphysema, asthma, rhinitis, eczema or allergy diagnosed by doctor</p> <p>Red blood cell count</p> <p>Waist circumference</p> <p>Weight</p> <p>Whole body fat-free mass</p> <p>Whole body water mass</p> |
| rs6439168 | <p>Basal metabolic rate</p> <p>Forced expiratory volume in 1 sec</p> <p>Forced vital capacity</p> <p>Height</p> <p>Hip circumference</p> <p>Usual walking pace</p> <p>Weight</p> <p>Whole body fat-free mass</p> <p>Whole body water mass</p>                                                                                                                                                                                                                     |
|           | <p>Allergic disease</p> <p>Basal metabolic rate</p> <p>Birth weight of first child</p> <p>Body fat percentage</p> <p>Crohns disease</p>                                                                                                                                                                                                                                                                                                                           |

rs724016

Diastolic blood pressure  
Ever had prostate specific antigen test  
Forced expiratory volume in 1 sec  
Forced vital capacity  
Hair or balding pattern  
Hand grip strength  
Hayfever, allergic rhinitis or eczema  
Heel bone mineral density  
Height  
Hip circumference  
Infant length  
Lymphocyte count  
Lymphocyte percentage of white cells  
Mean corpuscular hemoglobin  
Mean corpuscular volume  
Myopia  
Neutrophil percentage of white cells  
No blood clot, bronchitis, emphysema, asthma, rhinitis, eczema or allergy diagnosed by doctor  
Potassium in urine  
Pulse rate  
Red blood cell count  
Relative age of first facial hair  
Self-reported enlarged prostate  
Trunk fat percentage  
Waist circumference  
Weight  
Whole body fat mass  
Whole body fat-free mass

|            |                                                                                                                                                                                                                         |
|------------|-------------------------------------------------------------------------------------------------------------------------------------------------------------------------------------------------------------------------|
|            | Whole body water mass                                                                                                                                                                                                   |
| rs13094143 | Average weekly beer plus cider intake<br>Basal metabolic rate<br>Height<br>Hip circumference<br>Monokine induced by gamma interferon levels<br>Trunk fat-free mass<br>Whole body fat-free mass<br>Whole body water mass |
| rs519384   | Age at menarche<br>Basal metabolic rate<br>Forced expiratory volume in 1 sec<br>Forced vital capacity<br>Height<br>Impedance<br>Peak expiratory flow<br>Pulse rate<br>Trunk fat-free mass<br>Whole body fat-free mass   |
| rs720390   | Basal metabolic rate<br>BMI<br>Diabetes diagnosed by doctor<br>Height<br>Hip circumference<br>Illnesses of father: daibetes<br>Platelet count<br>Plateletcrit<br>Self-reported diabetes                                 |



|           |                                                                                                                                                                                                                                                                                                                                                                                                                                                                                                                                                                                                                                                                                                                                             |
|-----------|---------------------------------------------------------------------------------------------------------------------------------------------------------------------------------------------------------------------------------------------------------------------------------------------------------------------------------------------------------------------------------------------------------------------------------------------------------------------------------------------------------------------------------------------------------------------------------------------------------------------------------------------------------------------------------------------------------------------------------------------|
|           | Waist circumference<br>Whole body fat-free mass<br>Whole body water mass                                                                                                                                                                                                                                                                                                                                                                                                                                                                                                                                                                                                                                                                    |
| rs6853216 | Age at first live birth<br>Basal metabolic rate<br>Birth weight<br>Body fat percentage<br>Diastolic blood pressure<br>Fluid intelligence score<br>Forced expiratory volume in 1 sec<br>Forced vital capacity<br>Hand grip strength<br>Height<br>Hip circumference<br>Number of treatments or medications taken<br>Peak expiratory flow<br>Peritonsillar abscess<br>Qualifications: A levels or as levels or equivalent<br>Self-reported hypertension<br>Systolic blood pressure<br>Time spent watching tv<br>Vascular or heart problems diagnosed by doctor: high blood pressure<br>Vascular or heart problems diagnosed by doctor: none of the above<br>Waist circumference<br>Weight<br>Whole body fat-free mass<br>Whole body water mass |
|           | Body fat percentage                                                                                                                                                                                                                                                                                                                                                                                                                                                                                                                                                                                                                                                                                                                         |

|            |                                                                                                                                                                                                                                                                                   |
|------------|-----------------------------------------------------------------------------------------------------------------------------------------------------------------------------------------------------------------------------------------------------------------------------------|
| rs4694504  | Height<br>Hip circumference<br>Impedance<br>Waist circumference                                                                                                                                                                                                                   |
| rs1975474  | Basal metabolic rate<br>Forced expiratory volume in 1 sec<br>Forced vital capacity<br>Height<br>Hip circumference<br>Overall health rating<br>Unspecified haematuria<br>Waist circumference<br>Weight<br>Whole body fat mass<br>Whole body fat-free mass<br>Whole body water mass |
| rs1562975  | Height                                                                                                                                                                                                                                                                            |
| rs12648786 | Basal metabolic rate<br>Birth weight<br>Forced expiratory volume in 1 sec<br>Forced vital capacity<br>Height<br>Hip circumference<br>Peak expiratory flow<br>Waist hip ratio<br>Weight<br>Whole body fat-free mass<br>Whole body water mass                                       |

|           |                                                                                                                                                                                                                                                                                                                                                                                                                                                                                                                                                     |
|-----------|-----------------------------------------------------------------------------------------------------------------------------------------------------------------------------------------------------------------------------------------------------------------------------------------------------------------------------------------------------------------------------------------------------------------------------------------------------------------------------------------------------------------------------------------------------|
| rs7689420 | <p>Basal metabolic rate</p> <p>Forced expiratory volume in 1 sec</p> <p>Forced vital capacity</p> <p>Hand grip strength</p> <p>Height</p> <p>Hip circumference</p> <p>Peak expiratory flow</p> <p>Waist circumference</p> <p>Weight</p> <p>Whole body fat mass</p> <p>Whole body fat-free mass</p> <p>Whole body water mass</p>                                                                                                                                                                                                                     |
| rs6450922 | <p>Basal metabolic rate</p> <p>Height</p> <p>Hip circumference</p> <p>Whole body fat-free mass</p> <p>Whole body water mass</p>                                                                                                                                                                                                                                                                                                                                                                                                                     |
|           | <p>Basal metabolic rate</p> <p>Diastolic blood pressure</p> <p>Forced expiratory volume in 1 sec</p> <p>Height</p> <p>Hip circumference</p> <p>Illnesses of siblings: high blood pressure</p> <p>Illnesses of siblings: none of the above, group 1</p> <p>Medication for cholesterol, blood pressure or diabetes: blood pressure medication</p> <p>Medication for cholesterol, blood pressure or diabetes: none of the above</p> <p>Number of self-reported non-cancer illnesses</p> <p>Self-reported gestational hypertension or pre-eclampsia</p> |

rs7733331

Self-reported hypertension  
Systolic blood pressure  
Treatment with bendroflumethiazide  
Treatment with blood pressure  
Treatment with lisinopril  
Vascular or heart problems diagnosed by doctor: high blood pressure  
Vascular or heart problems diagnosed by doctor: none of the above  
Waist circumference  
Weight  
Whole body fat mass  
Whole body fat-free mass  
Whole body water mass

rs6894139

Basal metabolic rate  
Bone mineral density  
Femoral neck bone mineral density  
Forced expiratory volume in 1 sec  
Forced vital capacity  
Forearm bone mineral density  
Hair or balding pattern  
Height  
Platelet count  
Platelet distribution width  
Plateletcrit  
Whole body fat-free mass  
Whole body water mass

Asthma  
Basal metabolic rate  
Basophil count

rs274567

Blood metabolite levels  
Crohns disease  
Eosinophil percentage of granulocytes  
Eosinophil percentage of white cells  
Eosinophinil count  
Granulocyte count  
Hand grip strength  
Height  
High light scatter percentage of red cells  
Inmature fration of reticulocytes  
Mean platelet volum  
Monocyte count  
Myeloid white cell count  
Neutrophil count  
Neutrophil percentage of granulocytes  
No blood clot, bronchitis, emphysema, asthma, rhinitis, eczema or allergy diagnosed by doctor  
Platelet count  
Reticulocyte fraction of red cells  
Self-reported asthma  
Self-reported hypertension  
Sum basophil neutrophil counts  
Sum eosinophil basophil counts  
Sum neutrophil eosinophil counts  
Treatment with bendroflumethiazide  
Vascular or heart problems diagnosed by doctor: high blood pressure  
Vascular or heart problems diagnosed by doctor: none of the above  
Waist circumference  
Weight

|           |                                                                                                                                                                                |
|-----------|--------------------------------------------------------------------------------------------------------------------------------------------------------------------------------|
|           | White blood cell count<br>Whole body fat-free mass<br>Whole body water mass                                                                                                    |
| rs31198   | Basal metabolic rate<br>Forced expiratory volume in 1 sec<br>Forced vital capacity<br>Heel bone mineral density<br>Height<br>Whole body fat-free mass<br>Whole body water mass |
| rs4282339 | Basal metabolic rate<br>Forced vital capacity<br>Hand grip strength<br>Height<br>Weight<br>Whole body fat-free mass<br>Whole body water mass                                   |
| rs153753  | Basal metabolic rate<br>Hand grip strength<br>Height<br>Hip circumference<br>Whole body fat-free mass<br>Whole body water mass                                                 |
| rs4868126 | Basal metabolic rate<br>Height<br>Hip circumference<br>Waist circumference<br>Weight                                                                                           |

|           |                                                                                                                                                                                                                                                                                                                                                                                                                                                                   |
|-----------|-------------------------------------------------------------------------------------------------------------------------------------------------------------------------------------------------------------------------------------------------------------------------------------------------------------------------------------------------------------------------------------------------------------------------------------------------------------------|
|           | Whole body fat-free mass<br>Whole body water mass                                                                                                                                                                                                                                                                                                                                                                                                                 |
| rs4868293 | Height<br>Hip circumference                                                                                                                                                                                                                                                                                                                                                                                                                                       |
| rs2714354 | Height                                                                                                                                                                                                                                                                                                                                                                                                                                                            |
| rs3812163 | Basal metabolic rate<br>Forced expiratory volume in 1 sec<br>Hand grip strength<br>Height<br>Weight<br>Whole body fat-free mass<br>Whole body water mass                                                                                                                                                                                                                                                                                                          |
|           | Basal metabolic rate<br>Birth weight<br>BMI<br>Body fat percentage<br>Breastfed as a baby<br>Disorders mineral metabolism<br>Exposure to tobacco smoke outside home<br>Forced expiratory volume in 1 sec<br>Gene expression<br>Hayfever, allergic rhinitis or eczema<br>Hearing difficulty or problems with background noise<br>Height<br>Hemoglobin concentration<br>High density lipoprotein<br>High light scatter percentage of red cells<br>Hip circumference |

rs806794

Mean corpuscular hemoglobin  
Mean corpuscular hemoglobin concentration  
Mean corpuscular volume  
Medication for cholesterol, blood pressure or diabetes: blood pressure medication  
Medication for cholesterol, blood pressure or diabetes: none of the above  
Mouth or teeth dental problems: dentures  
Number of cigarettes previously smoked daily  
Pack years adult smoking as proportion of life span exposed to smoking  
Pack years of smoking previous only  
Qualifications: A levels or as levels or equivalent  
Qualifications: college or university degree  
Red cell distribution width  
Reticulocyte count  
Reticulocyte fraction of red cells  
Self-reported hypertension  
Time spent watching tv  
Transport type for commuting to job workplace: cycle  
Types of physical activity in last 4 weeks: strenuous sports  
Usual walking pace  
Varicose veins of lower extremities  
Vascular or heart problems diagnosed by doctor: high blood pressure  
Vascular or heart problems diagnosed by doctor: none of the above  
Waist circumference  
Weight  
Whole body fat mass  
Whole body fat-free mass  
Whole body water mass  
Worry too long after embarrassment



rs7744253

Years educational attainment

Basal metabolic rate  
Basophil count  
Coronary artery disease  
Eosinophil count  
Forced vital capacity  
Granulocyte count  
Hand grip strength  
Hearing difficulty or problems with background noise  
Height  
Hemoglobin concentration  
Hip circumference  
Intestinal malabsorption  
Lymphocyte count  
Lymphocyte percentage of white cells  
Mean corpuscular hemoglobin concentration  
Mean platelet volume  
Monocyte count  
Mouth or teeth dental problems: mouth ulcers  
Myeloid white cell count  
Neutrophil count  
Peak expiratory flow  
Red cell distribution width  
Rheumatoid arthritis  
Rheumatoid arthritis  
Self-reported ankylosing spondylitis  
Self-reported hypothyroidism or myxoedema  
Self-reported malabsorption or coeliac disease

Self-reported sarcoidosis  
Started insulin within one year diagnosis of diabetes  
Sum basophil neutrophil counts  
Sum neutrophil eosinophil counts  
Treatment with levothyroxine sodium  
Treatment with thyroxine product  
Weight  
White blood cell count  
Whole body fat-free mass  
Whole body water mass

Ankylosing spondylitis  
Basal metabolic rate  
Basophil count  
Basophil percentage with white cells  
Birth weight  
Diastolic blood pressure  
Eosinophil percentage of white cells  
Eosinophil count  
Eosinophil percentage of granulocytes  
Forced expiratory volume in 1 sec  
Forced vital capacity  
Gene expression  
Granulocyte count  
Height  
Hip circumference  
IgA deficiency  
Intestinal malabsorption  
Lymphocyte count

rs2256183

Lymphocyte percentage of white cells  
Mean platelet volum  
Medication for pain relief, constipation, heartburn: none of the above  
Monocyte count  
Mouth or teeth dental problems: mouth ulcers  
Myeloid white cell count  
Neutrophil count  
Neutrophil percentage of granulocytes  
Neutrophil percentage of white cells  
Platelet distribution width  
Plateletcrit  
Primary sclerosing cholangitis  
Red cell distribution width  
Reticulocyte count  
Reticulocyte fraction of red cells  
Rheumatoid arthritis  
Self-reported adrenocortical insufficiency or addisons disease  
Self-reported ankylosing spondylitis  
Self-reported high cholesterol  
Self-reported hypothyroidism, thyrotocosis or myxoedema  
Self-reported malabsorption or coeliac disease  
Self-reported psoriasis  
Self-reported sarcoidosis  
Sum basophil neutrophil counts  
Sum eosinophil basophil counts  
Total cholesterol  
Treatment with levothyroxine sodium  
Unspecified haematuria

Weight

White blood cell count

Whole body water mass

Basal metabolic rate

Basophil count

Diastolic blood pressure

Doctor diagnosed sarcoidosis

DPA 22:5n3

Drive faster than motorway speed limit

Eosinophinil count

Eosinophil percentage of granulocytes

Eosinophil percentage of white cells

Forced expiratory volume in 1 sec

Forced vital capacity

Frequency of tenseness or restlessness in last 2 weeks

Granulocyte count

Hand grip strength

Height

High light scatter percentage of red cells

High light scatter reticulocyte count

Hip circumference

Impedance

Intestinal malabsorption

Lymphocyte count

Medication for cholesterol, blood pressure or diabetes: cholesterol lowering medication

Medication for cholesterol, blood pressure or diabetes: none of the above

Medication for pain relief, constipation, heartburn: none of the above

Monocyte count

rs6937696

Mouth or teeth dental problems: mouth ulcers  
Multiple sclerosis  
Myeloid cell count  
Neutrophil count  
Neutrophil percentage of granulocytes  
Number of self-reported non-cancer illnesses  
Number of treatments or medications taken  
Other rheumatoid arthritis  
Overall health rating  
Primary sclerosing cholangitis  
Reticulocyte count  
Reticulocyte fraction of red cells  
Rheumatoid arthritis  
Self-reported adrenocortical insufficiency or addisons disease  
Self-reported ankylosing spondylitis  
Self-reported high cholesterol  
Self-reported hypertension  
Self-reported hyperthyroidism or thyrotoxicosis  
Self-reported hypothyroidism or myxoedema  
Self-reported malabsorption or coeliac disease  
Self-reported multiple sclerosis  
Self-reported multiple sclerosis  
Self-reported psoriasis  
Self-reported rheumatoid arthritis  
Self-reported sarcoidosis  
Self-reported sjogrens syndrome or sicca syndrome  
Self-reported-systemic lupus erythematosus or sle  
Seropositive rheumatoid arthritis

|                                                                     |
|---------------------------------------------------------------------|
| Sum basophil neutrophil counts                                      |
| Sum eosinophil basophil counts                                      |
| Sum neutrophil eosinophil counts                                    |
| Taking other prescription medications                               |
| Total cholesterol                                                   |
| Treatment with baclofen                                             |
| Treatment with carbimazole                                          |
| Treatment with fludrocortisone                                      |
| Treatment with methotrexate                                         |
| Treatment with simvastatin                                          |
| Treatment with sulfasalazine                                        |
| Unspecified haematuria                                              |
| Vascular or heart problems diagnosed by doctor: high blood pressure |
| Vascular or heart problems diagnosed by doctor: none of the above   |
| Weight                                                              |
| Wheeze or whistling in the chest in last year                       |
| White blood cell count                                              |
| Whole body fat-free mass                                            |
| Whole body water mass                                               |
| Worrier or anxious feelings                                         |

|                                   |
|-----------------------------------|
| Arm impedance                     |
| Basal metabolic rate              |
| Birth weight                      |
| Birth weight of first child       |
| Body height                       |
| BMI                               |
| Forced expiratory volume in 1 sec |
| Forced vital capacity             |

rs7742369

Height  
Hip circumference  
Home area population density: Scotland large urban area  
Mean corpuscular volume  
Peak expiratory flow  
Platelet count  
Waist circumference  
Weight  
Whole body fat mass  
Whole body fat-free mass  
Whole body water mass

rs9462007

Basal metabolic rate  
Body fat percentage  
BMI  
Coronary artery disease  
Forced expiratory volume in 1 sec  
HDL cholesterol  
Height  
High density lipoprotein  
Hip circumference  
Impedance  
Lymphocyte count  
Medication for pain relief, constipation, heartburn: none of the above  
Monocyte count  
Overall health rating  
Platelet count  
Plateletcrit  
Pulse rate

|           |                                                                                                                                                                                                                                                                                                                    |
|-----------|--------------------------------------------------------------------------------------------------------------------------------------------------------------------------------------------------------------------------------------------------------------------------------------------------------------------|
|           | Relative age of first facial hair<br>Total cholesterol<br>Treatment with omeprazole<br>Usual walking pace<br>Waist circumference<br>Weight<br>Whole body fat mass<br>Whole body fat-free mass<br>Whole body water mass                                                                                             |
| rs3734254 | Basal metabolic rate<br>Diastolic blood pressure<br>Forced expiratory volume in 1 sec<br>Forced expiratory volume in 1 sec<br>Hand grip strength<br>Height<br>Monocyte percentage of white cells<br>Peak expiratory flow<br>Systolic blood pressure<br>Weight<br>Whole body fat-free mass<br>Whole body water mass |
| rs9357470 | Basal metabolic rate<br>Coxarthrosis<br>Heel bone mineral density<br>Height<br>Hip circumference<br>Whole body fat-free mass<br>Whole body water mass                                                                                                                                                              |



|            |                                                                                                                                                                                                                                                                                                                                                                                                                                                                                                         |
|------------|---------------------------------------------------------------------------------------------------------------------------------------------------------------------------------------------------------------------------------------------------------------------------------------------------------------------------------------------------------------------------------------------------------------------------------------------------------------------------------------------------------|
| rs12209223 | <p>Basal metabolic rate</p> <p>Forced expiratory volume in 1 sec</p> <p>Height</p> <p>Hip circumference</p> <p>Hip osteoarthritis</p> <p>Waist circumference</p> <p>Weight</p> <p>Whole body fat-free mass</p> <p>Whole body water mass</p>                                                                                                                                                                                                                                                             |
| rs920842   | <p>Basal metabolic rate</p> <p>Forced vital capacity</p> <p>Height</p> <p>Weight</p> <p>Whole body fat-free mass</p> <p>Whole body water mass</p>                                                                                                                                                                                                                                                                                                                                                       |
| rs314263   | <p>Age at menarche</p> <p>Basal metabolic rate</p> <p>Forced expiratory volume in 1 sec</p> <p>Forced vital capacity</p> <p>Hand grip strength</p> <p>Height</p> <p>Hip circumference</p> <p>Impedance</p> <p>Medication for cholesterol, blood pressure or diabetes: blood pressure medication</p> <p>Medication for pain relief, constipation, heartburn: none of the above</p> <p>Number of operations</p> <p>Number of treatments or medications taken</p> <p>Relative age of first facial hair</p> |

|                       |                                                                                                                                                                                                                                                                                                                                                                                                                                                               |
|-----------------------|---------------------------------------------------------------------------------------------------------------------------------------------------------------------------------------------------------------------------------------------------------------------------------------------------------------------------------------------------------------------------------------------------------------------------------------------------------------|
|                       | Relative age voice broke<br>Sleeplessness or insomnia<br>Tanner stage<br>Waist circumference<br>Weight<br>Whole body fat mass<br>Whole body fat-free mass<br>Whole body water mass                                                                                                                                                                                                                                                                            |
| rs9488923 (rs2027850) | Height                                                                                                                                                                                                                                                                                                                                                                                                                                                        |
| rs9388490             | Age at menarche<br>Age completed full time education<br>Basal metabolic rate<br>Birth weight<br>Body fat percentage<br>Coronary artery disease<br>Diabetes diagnosed by doctor<br>Forced expiratory volume in 1 sec<br>Forced vital capacity<br>Hair or balding pattern<br>Height<br>Hematocrit<br>Hemoglobin concentration<br>Hip circumference<br>Impedance<br>Intelligence<br>Intelligence multi triat analysis<br>Intracranial volume<br>Nervous feelings |

|           |                                                                                                                                                                                                                                                                                                                                                                                                                                                                                                                               |
|-----------|-------------------------------------------------------------------------------------------------------------------------------------------------------------------------------------------------------------------------------------------------------------------------------------------------------------------------------------------------------------------------------------------------------------------------------------------------------------------------------------------------------------------------------|
|           | Pain type experienced in last month: none of the above<br>Red blood cell count<br>Sodium in urine<br>Type II diabetes<br>Weight<br>Whole body fat-free mass<br>Whole body water mass                                                                                                                                                                                                                                                                                                                                          |
| rs6569648 | Basal metabolic rate<br>BMI<br>Breast cancer<br>Breast cancer estrogen receptor negative<br>Creatinine in urine<br>Forced expiratory volume in 1 sec<br>Forced vital capacity<br>Hand grip strength<br>Heel bone mineral density<br>Height<br>Hematocrit<br>Hemoglobin concentration<br>High light scatter reticulocyte count<br>Hip circumference<br>Immature fraction of reticulocytes<br>Impedance<br>Lymphocyte count<br>Maternal effects on offspring birthweight<br>Waist hip ratio<br>Weight<br>White blood cell count |

|           |                                                                                                                                                                                                                                                                                                                                       |
|-----------|---------------------------------------------------------------------------------------------------------------------------------------------------------------------------------------------------------------------------------------------------------------------------------------------------------------------------------------|
|           | Whole body fat mass<br>Whole body fat-free mass<br>Whole body water mass                                                                                                                                                                                                                                                              |
| rs9389986 | Basal metabolic rate<br>Birth weight<br>Birthlength<br>Forced expiratory volume in 1 sec<br>Forced vital capacity<br>Height<br>Hip circumference<br>Impedance<br>Lung function ratio of forced expiratory volum in 1 sec<br>Waist circumference<br>Weight<br>Whole body fat mass<br>Whole body fat-free mass<br>Whole body water mass |
| rs827423  | Basal metabolic rate<br>Forced expiratory volume in 1 sec<br>Forced vital capacity<br>Heel bone mineral density<br>Height<br>Hip circumference<br>Weight<br>Whole body fat-free mass<br>Whole body water mass                                                                                                                         |
|           | Arm impedance<br>Basal metabolic rate<br>Birth weight                                                                                                                                                                                                                                                                                 |

|           |                                                                                                                                                                                                                                                                                                                                                                                                                                               |
|-----------|-----------------------------------------------------------------------------------------------------------------------------------------------------------------------------------------------------------------------------------------------------------------------------------------------------------------------------------------------------------------------------------------------------------------------------------------------|
| rs1182199 | Body fat percentage<br>Forced expiratory volume in 1 sec<br>Forced vital capacity<br>Height<br>Hip circumference<br>Myeloid white cell count<br>Not blood clot, bronchitis, emphysema, asthma, rhinitis, eczema or allergy diagnosed by doctor<br>Platelet count<br>Plateletcrit<br>Ulcerative colitis<br>Waist circumference<br>Weight<br>White blood cell count<br>Whole body fat mass<br>Whole body fat-free mass<br>Whole body water mass |
| rs2192476 | Height                                                                                                                                                                                                                                                                                                                                                                                                                                        |
| rs506154  | Basal metabolic rate<br>Diabetes diagnosed by doctor<br>Forced expiratory volume in 1 sec<br>Forced vital capacity<br>Height<br>Hip circumference<br>Impedance<br>Self-reported diabetes<br>Treatment with metformin<br>Waist circumference<br>Weight<br>Whole body fat-free mass                                                                                                                                                             |

|            |                                                                                                                                                                                                                                                                                                                                                                                                                                                                                                            |
|------------|------------------------------------------------------------------------------------------------------------------------------------------------------------------------------------------------------------------------------------------------------------------------------------------------------------------------------------------------------------------------------------------------------------------------------------------------------------------------------------------------------------|
|            | Whole body water mass                                                                                                                                                                                                                                                                                                                                                                                                                                                                                      |
| rs12673331 | Basal metabolic rate<br>Forced expiratory volume in 1 sec<br>Forced vital capacity<br>Height<br>Impedance<br>Whole body fat-free mass<br>Whole body water mass                                                                                                                                                                                                                                                                                                                                             |
| rs2282978  | Basal metabolic rate<br>Birth weight<br>Body height<br>CDK6 expression in lymphocytes<br>Forced expiratory volume in 1 sec<br>Forced vital capacity<br>Granulocyte percentage of myeloid white cells<br>Heel bone mineral density<br>Height<br>Hip circumference<br>Monocyte count<br>Monocyte percentage of white cells<br>Pulse pressure<br>Rheumatoid arthritis<br>Systolic blood pressure<br>Waist circumference<br>Weight<br>Whole body fat mass<br>Whole body fat-free mass<br>Whole body water mass |
|            | Basal metabolic rate<br>Birth weight<br>Forced expiratory volume in 1 sec                                                                                                                                                                                                                                                                                                                                                                                                                                  |

|           |                                                                                                                                                                                                                                 |
|-----------|---------------------------------------------------------------------------------------------------------------------------------------------------------------------------------------------------------------------------------|
| rs9650315 | Forced vital capacity<br>Height<br>Hip circumference<br>Impedance<br>Weight<br>Whole body fat-free mass<br>Whole body water mass                                                                                                |
| rs7463906 | Basal metabolic rate<br>Forced expiratory volume in 1 sec<br>Forced vital capacity<br>Height<br>Hip circumference<br>Peak expiratory flow<br>Waist circumference<br>Weight<br>Whole body fat-free mass<br>Whole body water mass |
| rs7463906 | Basal metabolic rate<br>Forced expiratory volume in 1 sec<br>Forced vital capacity<br>Height<br>Hip circumference<br>Peak expiratory flow<br>Waist circumference<br>Weight<br>Whole body fat-free mass<br>Whole body water mass |
|           | Basal metabolic rate                                                                                                                                                                                                            |

|           |                                                                                                                                                                                                                                                                          |
|-----------|--------------------------------------------------------------------------------------------------------------------------------------------------------------------------------------------------------------------------------------------------------------------------|
| rs7463906 | Forced expiratory volume in 1 sec<br>Forced vital capacity<br>Height<br>Hip circumference<br>Peak expiratory flow<br>Waist circumference<br>Weight<br>Whole body fat-free mass<br>Whole body water mass                                                                  |
| rs7463906 | Basal metabolic rate<br>Forced expiratory volume in 1 sec<br>Forced vital capacity<br>Height<br>Hip circumference<br>Peak expiratory flow<br>Waist circumference<br>Weight<br>Whole body fat-free mass<br>Whole body water mass                                          |
| rs4130415 | Basal metabolic rate<br>Forced expiratory volume in 1 sec<br>Forced vital capacity<br>Heel bone mineral density<br>Height<br>Hip circumference<br>Pain type experienced in last month: back pain<br>Peak expiratory flow<br>Self-reported prolapsed disc or slipped disc |



|            |                                                                                                                                                                                                                                 |
|------------|---------------------------------------------------------------------------------------------------------------------------------------------------------------------------------------------------------------------------------|
|            | Waist circumference<br>Weight<br>Whole body fat-free mass<br>Whole body water mass                                                                                                                                              |
| rs4909595  | Basal metabolic rate<br>Forced expiratory volume in 1 sec<br>Height<br>Hip circumference<br>Systolic blood pressure<br>Treatment with rennie duo oral suspension<br>Weight<br>Whole body fat-free mass<br>Whole body water mass |
| rs9407763  | Height                                                                                                                                                                                                                          |
| rs11144688 | Basal metabolic rate<br>Forced expiratory volume in 1 sec<br>Height<br>Hip circumference<br>Impedance<br>Waist circumference<br>Weight<br>Whole body fat-free mass<br>Whole body water mass                                     |
|            | Alcohol usually taken with meals<br>Eosinophil percentage of granulocytes<br>Eosinophil percentage of white cells<br>Granulocyte count<br>Hair or balding pattern                                                               |

|           |                                                                                                                                                                                                                                                                   |
|-----------|-------------------------------------------------------------------------------------------------------------------------------------------------------------------------------------------------------------------------------------------------------------------|
| rs7855177 | Height<br>Impedance<br>Mean time to correctly identify matches<br>Myeloid white cell count<br>Nap during day<br>Neutrophil count<br>Neutrophil percentage of granulocytes<br>Sum basophil neutrophil counts<br>Sumneutrophil eosinophil<br>White blood cell count |
| rs3937594 | Basal metabolic rate<br>Forced expiratory volume in 1 sec<br>Height<br>Hip circumference<br>Nonrheumatic aortic valve disorders<br>Weight<br>Whole body fat-free mass<br>Whole body water mass                                                                    |
| rs7043114 | Arm impedance<br>Height                                                                                                                                                                                                                                           |
| rs4448343 | Basal metabolic rate<br>Birth weight<br>Fluid intelligence score<br>Forced expiratory volume in 1 sec<br>Heel bone mineral density<br>Height<br>Hip circumference<br>Time spent using computer                                                                    |

|           |                                                                                                                                                                                                                                                                                                                         |
|-----------|-------------------------------------------------------------------------------------------------------------------------------------------------------------------------------------------------------------------------------------------------------------------------------------------------------------------------|
|           | <p>Waist circumference</p> <p>Whole body fat-free mass</p> <p>Whole body water mass</p>                                                                                                                                                                                                                                 |
| rs2025151 | <p>Basal metabolic rate</p> <p>Forced vital capacity</p> <p>Height</p> <p>Hip circumference</p> <p>Job involves heavy manual or physical work</p> <p>Platelet count</p> <p>Platelet distribution width</p> <p>Pulse rate</p> <p>Time spent watching tv</p> <p>Whole body fat-free mass</p> <p>Whole body water mass</p> |
| rs4333673 | <p>Basal metabolic rate</p> <p>Forced vital capacity</p> <p>Height</p> <p>Whole body fat-free mass</p> <p>Whole body water mass</p>                                                                                                                                                                                     |
| rs7853634 | <p>Basal metabolic rate</p> <p>Forced expiratory volume in 1 sec</p> <p>Forced vital capacity</p> <p>Hand grip strength</p> <p>Height</p> <p>Impedance</p> <p>Weight</p> <p>Whole body fat-free mass</p> <p>Whole body water mass</p>                                                                                   |

|           |                                                                                                                                                                                                                                                                                                                                                                                      |
|-----------|--------------------------------------------------------------------------------------------------------------------------------------------------------------------------------------------------------------------------------------------------------------------------------------------------------------------------------------------------------------------------------------|
| rs7466269 | <p>Basal metabolic rate</p> <p>Bone mineral density paediatric lower limb</p> <p>Bone mineral density paediatric total body less head</p> <p>Forced expiratory volume in 1 sec</p> <p>Forced vital capacity</p> <p>Hand grip strength</p> <p>Heel bone mineral density</p> <p>Height</p> <p>Weight</p> <p>Whole body fat-free mass</p> <p>Whole body water mass</p>                  |
| rs4980067 | <p>Basal metabolic rate</p> <p>Forced vital capacity</p> <p>Height</p> <p>High light scatter percentage of red cells</p> <p>High light scatter reticulocyte count</p> <p>Inmature fraction of reticulocytes</p> <p>Platelet count</p> <p>Reticulocyte count</p> <p>Reticulocyte fraction of red cells</p> <p>Weight</p> <p>Whole body fat-free mass</p> <p>Whole body water mass</p> |
| rs234886  | <p>Basal metabolic rate</p> <p>Height</p> <p>Hip circumference</p> <p>Waist circumference</p> <p>Weight</p>                                                                                                                                                                                                                                                                          |

|            |                                                                                                                                                                                                                                |
|------------|--------------------------------------------------------------------------------------------------------------------------------------------------------------------------------------------------------------------------------|
|            | Whole body fat-free mass<br>Whole body water mass                                                                                                                                                                              |
| rs1879671  | Height<br>Treatment with amiodarone                                                                                                                                                                                            |
| rs606452   | Age-related macular degeneration<br>BMI<br>Coronary artery disease<br>Forced expiratory volume in 1 sec<br>Forced vital capacity<br>Height<br>Hip circumference<br>Impedance<br>Waist circumference                            |
| rs6487133  | Basal metabolic rate<br>Forced expiratory volume in 1 sec<br>Forced vital capacity<br>Height<br>Whole body fat-free mass<br>Whole body water mass                                                                              |
| rs11049611 | Basal metabolic rate<br>Forced expiratory volume in 1 sec<br>Hand grip strength<br>Height<br>Mouth or teeth dental problems: loose teeth<br>Waist circumference<br>Weight<br>Whole body fat-free mass<br>Whole body water mass |

rs1351394

Age at first tooth  
Alcohol intake frequency  
Basal metabolic rate  
Birth length  
Birth weight  
BMI  
Diabetes diagnosed by doctor  
Estimated total intracranial volume excluding patients with neuropsychiatric disorders  
Forced expiratory volume in 1 sec  
Forced vital capacity  
Hand grip strength  
Height  
Hip circumference  
Impedance  
Infant head circumference  
Intracranial volume  
Maternal effects on offspring birthweight  
Number of teeth  
Overall health rating  
Peak expiratory flow  
Pulse rate  
Self-reported diabetes  
Self-reported high cholesterol  
Treatment with metformin  
Waist circumference  
Weight  
Whole body fat mass  
Whole body fat-free mass

|                        |                                                                                                                                                                                                                                                                                                                 |
|------------------------|-----------------------------------------------------------------------------------------------------------------------------------------------------------------------------------------------------------------------------------------------------------------------------------------------------------------|
|                        | Whole body water mass                                                                                                                                                                                                                                                                                           |
| rs10748128             | Basal metabolic rate<br>Height<br>Hip circumference<br>Waist circumference<br>Weight<br>Whole body fat-free mass<br>Whole body water mass                                                                                                                                                                       |
| rs11107116 (rs3825199) | Basal metabolic rate<br>Forced expiratory volume in 1 sec<br>Forced vital capacity<br>Gene expression<br>Heel bone mineral density<br>Height<br>Hip circumference<br>Impedance<br>Standarized difference in height between age 8 years and adult<br>Weight<br>Whole body fat-free mass<br>Whole body water mass |
| rs11107169             | Basal metabolic rate<br>Heel bone mineral density<br>Height<br>Hip circumference<br>Whole body fat-free mass<br>Whole body water mass                                                                                                                                                                           |
|                        | Age at menopause<br>Age completed full time education                                                                                                                                                                                                                                                           |

rs7980687

Alcohol intake frequency  
Allergic disease  
Average weekly red wine intake  
Basal metabolic rate  
Brain  
College completion  
Diastolic blood pressure  
Educational attainment  
Hayfever, allergic rhinitis or eczema  
Head circumference infant  
Heel bone mineral density  
Height  
Hip circumference  
Infant head circumference  
Job involves heavy manual or physical work  
Lymphocyte count  
Lymphocyte percentage of white cells  
Neutrophil percentage of white cells  
No blood clot, bronchitis, emphysema, asthma, rhinitis, eczema or allergy diagnosed by doctor  
Platelet count  
Plateletcrit  
Qualifications: A levels or as levels or equivalent  
Qualifications: college or university degree  
Qualifications: none  
Qualifications: O levels or GCSEs or equivalent  
Qualifications: other professional qualifications  
Schizophrenia  
Time spent watching tv



|           |                                                                                                                                                                                                                                                                                                                                                 |
|-----------|-------------------------------------------------------------------------------------------------------------------------------------------------------------------------------------------------------------------------------------------------------------------------------------------------------------------------------------------------|
|           | Weight<br>Whole body fat-free mass<br>Whole body water mass<br>Years of education<br>Years of educational attainment                                                                                                                                                                                                                            |
| rs7986486 | Basal metabolic rate<br>Forced expiratory volume in 1 sec<br>Forced vital capacity<br>Height<br>High light scatter percentage of red cells<br>Impedance<br>Peak expiratory flow<br>Weight<br>Whole body fat-free mass<br>Whole body water mass                                                                                                  |
| rs3118905 | Basal metabolic rate<br>Diastolic blood pressure<br>Forced expiratory volume in 1 sec<br>Forced vital capacity<br>Hand grip strength<br>Heel bone mineral density<br>Height<br>Hip circumference<br>Hyperplasia of prostate<br>Impedance<br>Standarized difference in height between age 8 years and adult<br>Systolic blood pressure<br>Weight |

|           |                                                                                                                                                                                                                                                                                                                                                                                                                                             |
|-----------|---------------------------------------------------------------------------------------------------------------------------------------------------------------------------------------------------------------------------------------------------------------------------------------------------------------------------------------------------------------------------------------------------------------------------------------------|
|           | Whole body fat-free mass<br>Whole body water mass                                                                                                                                                                                                                                                                                                                                                                                           |
| rs1950500 | Basal metabolic rate<br>Gene expression<br>Height<br>Weight<br>Whole body fat-free mass<br>Whole body water mass                                                                                                                                                                                                                                                                                                                            |
| rs2093210 | Age at menarche<br>Basal metabolic rate<br>Eye problems or disorders: glaucoma<br>Forced expiratory volume in 1 sec<br>Forced vital capacity<br>Glaucoma primary open angle glaucoma<br>Heel bone mineral density<br>Height<br>Hip circumference<br>Impedance<br>Self-reported glaucoma<br>Sodium in urine<br>Treatment with xalatan 0.005% eye drops<br>Weight<br>Whole body fat mass<br>Whole body fat-free mass<br>Whole body water mass |
|           | Age at first live birth<br>Age at menarche<br>Basal metabolic rate                                                                                                                                                                                                                                                                                                                                                                          |

|           |                                                                                                                                                                                                                                                                                                                                                                                                                                                                               |
|-----------|-------------------------------------------------------------------------------------------------------------------------------------------------------------------------------------------------------------------------------------------------------------------------------------------------------------------------------------------------------------------------------------------------------------------------------------------------------------------------------|
| rs5742915 | <p>Body fat percentage</p> <p>BMI</p> <p>Forced expiratory volume in 1 sec</p> <p>Forced vital capacity</p> <p>Gene expression</p> <p>Hand grip strength</p> <p>Height</p> <p>Hip circumference</p> <p>Number of fays or week of vigorous physical activity 10+ minutes</p> <p>Pagets disease</p> <p>Pulse rate</p> <p>Sleeplessness or insomnia</p> <p>Transport type for commuting to job workplace: cycle</p> <p>Whole body fat-free mass</p> <p>Whole body water mass</p> |
| rs4483821 | <p>Body fat percentage</p> <p>Forced expiratory volume in 1 sec</p> <p>Forced vital capacity</p> <p>Height</p> <p>Hip circumference</p> <p>Impedance</p> <p>Myopia</p> <p>Waist circumference</p> <p>Weight</p> <p>Whole body fat mass</p>                                                                                                                                                                                                                                    |
|           | <p>Arm impedance</p> <p>Body fat percentage</p> <p>Forced expiratory volume in 1 sec</p>                                                                                                                                                                                                                                                                                                                                                                                      |

|           |                                                                                                                                                                                                                                  |
|-----------|----------------------------------------------------------------------------------------------------------------------------------------------------------------------------------------------------------------------------------|
| rs2280470 | Forced vital capacity<br>Height<br>Hip circumference<br>Infant length<br>Waist circumference<br>Weight<br>Whole body fat mass<br>Whole body fat-free mass<br>Whole body water mass                                               |
| rs3784757 | Body fat percentage<br>Forced expiratory volume in 1 sec<br>Forced vital capacity<br>Height<br>Weight<br>Whole body fat-free mass<br>Whole body water mass                                                                       |
| rs2871865 | Basal metabolic rate<br>Birth weight<br>Birth weight of first child<br>Forced expiratory volume in 1 sec<br>Forced vital capacity<br>Hand grip strength<br>Height<br>Weight<br>Whole body fat-free mass<br>Whole body water mass |
|           | Forced vital capacity<br>Height                                                                                                                                                                                                  |

|           |                                                                                                                                                                                                                                                                                                                                                                                                                                     |
|-----------|-------------------------------------------------------------------------------------------------------------------------------------------------------------------------------------------------------------------------------------------------------------------------------------------------------------------------------------------------------------------------------------------------------------------------------------|
| rs4548838 | Hip circumference<br>Impedance<br>Waist circumference                                                                                                                                                                                                                                                                                                                                                                               |
| rs4548838 | Forced expiratory volume in 1 sec<br>Forced vital capacity<br>Height<br>Hip circumference<br>Impedance<br>Waist circumference                                                                                                                                                                                                                                                                                                       |
| rs8057808 | Basal metabolic rate<br>Fluid intelligence score<br>Height<br>Hip circumference<br>Impedance<br>Overall health rating<br>Pulse rate<br>Qualifications: college or university degree<br>Qualifications: none<br>Self-reported hypertension<br>Time spent watching tv<br>Time spent watching tv<br>Vascular or heart problems diagnosed by doctor: high blood pressure<br>Weight<br>Whole body fat-free mass<br>Whole body water mass |
|           | Age at menarche<br>Body fat percentage<br>BMI                                                                                                                                                                                                                                                                                                                                                                                       |

|            |                                                                                                                                                                                                                                                                                                                                                                                                                                                                             |
|------------|-----------------------------------------------------------------------------------------------------------------------------------------------------------------------------------------------------------------------------------------------------------------------------------------------------------------------------------------------------------------------------------------------------------------------------------------------------------------------------|
| rs11866219 | <p>Forced expiratory volume in 1 sec</p> <p>Forced vital capacity</p> <p>Hand grip strength</p> <p>Height</p> <p>Hip circumference</p> <p>Illness, injury, bereavement, stress in last 2 years: illness, injury or assault to yourself</p> <p>Leg impedance</p> <p>Long-standing illness, disability or infirmity</p> <p>Number of self-reported non-cancer illnesses</p> <p>Pulse rate</p> <p>Usual walking pace</p> <p>Waist circumference</p> <p>Whole body fat mass</p> |
| rs7213608  | <p>Body fat percentage</p> <p>BMI</p> <p>Forced expiratory volume in 1 sec</p> <p>Height</p> <p>High light scatter percentage of red cells</p> <p>Inmature fraction of reticulocytes</p> <p>Mean corpuscular volume</p> <p>Qualifications: A levels or as levels or equivalent</p> <p>Treatment with simvastatin</p> <p>Waist circumference</p> <p>Whole body fat-free mass</p> <p>Whole body water mass</p>                                                                |
|            | <p>Basal metabolic rate</p> <p>BMI</p> <p>Forced expiratory volume in 1 sec</p>                                                                                                                                                                                                                                                                                                                                                                                             |

|           |                                                                                                                                                                                                                                                                                                                                                                                            |
|-----------|--------------------------------------------------------------------------------------------------------------------------------------------------------------------------------------------------------------------------------------------------------------------------------------------------------------------------------------------------------------------------------------------|
| rs3764419 | <p>Gene expression</p> <p>Granulocyte percentage of myeloid white cells</p> <p>Height</p> <p>Hip circumference</p> <p>Mean corpuscular hemoglobin</p> <p>Mean corpuscular volume</p> <p>Neutrophil percentage of white cells</p> <p>Waist circumference</p> <p>Weight</p> <p>Whole body fat-free mass</p> <p>Whole body water mass</p>                                                     |
| rs584828  | <p>Basal metabolic rate</p> <p>Forced vital capacity</p> <p>Granulocyte count</p> <p>Height</p> <p>Hip circumference</p> <p>Neutrophil count</p> <p>Self-reported thyroid radioablation therapy</p> <p>Sum basophil neutrophil counts</p> <p>Sum neutrophil eosinophil counts</p> <p>Weight</p> <p>White blood cell count</p> <p>Whole body fat-free mass</p> <p>Whole body water mass</p> |
| 44657335  | <p>Allergic disease</p> <p>Basal metabolic rate</p> <p>Hair or balding pattern</p> <p>Hand grip strength</p> <p>Height</p> <p>Impedance</p> <p>No blood clot, bronchitis, emphysema, asthma, rhinitis, eczema or allergy diagnosed by doctor</p>                                                                                                                                           |

|                       |                                                                                                                                                                                                                                                                                                                                                                                                                                       |
|-----------------------|---------------------------------------------------------------------------------------------------------------------------------------------------------------------------------------------------------------------------------------------------------------------------------------------------------------------------------------------------------------------------------------------------------------------------------------|
| rs11657325            | <p>Overall health rating</p> <p>Sleeplessness or insomnia</p> <p>Systolic blood pressure</p> <p>Vascular or heart problems diagnosed by doctor: none of the above</p> <p>Weight</p> <p>Whole body fat-free mass</p> <p>Whole body water mass</p>                                                                                                                                                                                      |
| rs12453394            | <p>Basal metabolic rate</p> <p>Coronary artery disease</p> <p>Drive faster than motorway speed limit</p> <p>Forced vital capacity</p> <p>Frequency of tiredness or lethargy in last 2 weeks</p> <p>Gene expression of UBE2Z in blood</p> <p>Height</p> <p>Illness of mother: high blood pressure</p> <p>Illness of mother: none of the above</p> <p>Type II diabetes</p> <p>Whole body fat-free mass</p> <p>Whole body water mass</p> |
| rs963292              | <p>Arm fat-free mass</p> <p>Forced expiratory volume in 1 sec</p> <p>Height</p> <p>Trunk fat-free mass</p>                                                                                                                                                                                                                                                                                                                            |
| rs2079795 (rs7214743) | <p>Gene expression</p> <p>Height</p> <p>Waist circumference</p> <p>Waist hip ratio</p>                                                                                                                                                                                                                                                                                                                                                |
|                       | <p>Height</p>                                                                                                                                                                                                                                                                                                                                                                                                                         |



|           |                                                                                                                                                                                                                                                                                                                                                                           |
|-----------|---------------------------------------------------------------------------------------------------------------------------------------------------------------------------------------------------------------------------------------------------------------------------------------------------------------------------------------------------------------------------|
| rs2727317 | Hip circumference<br>Waist hip ratio                                                                                                                                                                                                                                                                                                                                      |
| rs4239437 | Acute pharyngitis<br>Basal metabolic rate<br>Forced expiratory volume in 1 sec<br>Hand grip strength<br>Heel bone mineral density<br>Height<br>Hip circumference<br>Mean platelet volume<br>Platelet count<br>Platelet distribution width<br>Waist circumference<br>Waist hip ratio<br>Weight<br>Whole body fat mass<br>Whole body fat-free mass<br>Whole body water mass |
| rs9967417 | Basal metabolic rate<br>Forced expiratory volume in 1 sec<br>Gene expression<br>Hand grip strength<br>Height<br>Hip circumference<br>Weight<br>Whole body fat-free mass<br>Whole body water mass                                                                                                                                                                          |
|           | Basal metabolic rate                                                                                                                                                                                                                                                                                                                                                      |

|            |                                                                                                                                                                                                                                                                                                                                                                               |
|------------|-------------------------------------------------------------------------------------------------------------------------------------------------------------------------------------------------------------------------------------------------------------------------------------------------------------------------------------------------------------------------------|
| rs12980348 | <p>Forced expiratory volume in 1 sec</p> <p>Hand grip strength</p> <p>Heel bone mineral density</p> <p>Height</p> <p>Hematocrit</p> <p>Hemoglobin concentration</p> <p>Hip circumference</p> <p>Red blood cell count</p> <p>Weight</p> <p>Whole body fat-free mass</p> <p>Whole body water mass</p>                                                                           |
| rs891088   | <p>Basal metabolic rate</p> <p>Height</p> <p>Hip circumference</p> <p>Serum urate</p> <p>Weight</p> <p>Whole body fat-free mass</p> <p>Whole body water mass</p>                                                                                                                                                                                                              |
|            | <p>Basal metabolic rate</p> <p>Blood clot in the lung</p> <p>Coronary artery disease</p> <p>Forced expiratory volume in 1 sec</p> <p>Forced vital capacity</p> <p>Height</p> <p>High light scatter percentage of red cells</p> <p>High light scatter reticulocyte count</p> <p>Hip circumference</p> <p>Inmature fraction of reticulocytes</p> <p>Low density lipoprotein</p> |

|                       |                                                                                                                                                                                                                                                                                                                                                                                                                               |
|-----------------------|-------------------------------------------------------------------------------------------------------------------------------------------------------------------------------------------------------------------------------------------------------------------------------------------------------------------------------------------------------------------------------------------------------------------------------|
| rs2738039 (rs1982075) | Morning or evening person<br>Pain type experienced in last month: knee pain<br>Peak expiratory flow<br>Platelet count<br>Plateletcrit<br>Red cell distribution width<br>Reticulocyte count<br>Reticulocyte fraction of red cells<br>Self-reported osteoarthritis<br>Self-reported pulmonary embolism + or - dvt<br>Time spent watching tv<br>Total cholesterol<br>Weight<br>Whole body fat-free mass<br>Whole body water mass |
| rs6038566             | Basal metabolic rate<br>BMI<br>Forced expiratory volume in 1 sec<br>Height<br>Hip circumference<br>Impedance<br>Waist circumference<br>Whole body fat-free mass<br>Whole body water mass                                                                                                                                                                                                                                      |
|                       | Basal metabolic rate<br>Forced expiratory volume in 1 sec<br>Forced vital capacity<br>Heel bone mineral density                                                                                                                                                                                                                                                                                                               |

|           |                                                                                                                                                                                                                                                                                                                                  |
|-----------|----------------------------------------------------------------------------------------------------------------------------------------------------------------------------------------------------------------------------------------------------------------------------------------------------------------------------------|
| rs7274811 | Height<br>Hip circumference<br>Impedance<br>Weight<br>Whole body fat mass<br>Whole body fat-free mass<br>Whole body water mass                                                                                                                                                                                                   |
| rs6142159 | Basal metabolic rate<br>Forced expiratory volume in 1 sec<br>Hair or balding pattern<br>Hand grip strength<br>Heel bone mineral density<br>Height<br>High density lipoprotein<br>Impedance<br>log eGFR creatinine<br>Past tobacco smoking<br>Peak expiratory flow<br>Weight<br>Whole body fat-free mass<br>Whole body water mass |
|           | Acquired deformities of fingers and toes<br>Basal metabolic rate<br>Birth weight<br>Forced expiratory volume in 1 sec<br>Forced vital capacity<br>Gene expression<br>Gonarthrosis                                                                                                                                                |

|                       |                                                                                                                                                                                                                                                                                                                                                                                                                                                                                                                                                                                                                       |
|-----------------------|-----------------------------------------------------------------------------------------------------------------------------------------------------------------------------------------------------------------------------------------------------------------------------------------------------------------------------------------------------------------------------------------------------------------------------------------------------------------------------------------------------------------------------------------------------------------------------------------------------------------------|
| rs143384              | <p>Hand grip strength</p> <p>Height</p> <p>Hip circumference</p> <p>Impedance</p> <p>Infant length</p> <p>Internal derangement of knee</p> <p>Joint mobility Beighton score</p> <p>Maximum heart rate during fitness test</p> <p>Pain type experienced in last month: knee pain</p> <p>Peak expiratory flow</p> <p>Qualifications: A levels or as levels or equivalent</p> <p>Relative age voice broke</p> <p>Total cholesterol</p> <p>Usual walking pace</p> <p>Waist circumference</p> <p>Waist hip ratio</p> <p>Weight</p> <p>Whole body fat mass</p> <p>Whole body fat-free mass</p> <p>Whole body water mass</p> |
| rs4821083 (rs2413143) | <p>Advanced age related macular degeneration</p> <p>Advanced age related macular degeneration choroidal neovascularization vs no AMD</p> <p>Arm fat-free mass</p> <p>Height</p> <p>Hip circumference</p> <p>Impedance</p> <p>Neovascularization</p> <p>Trunk fat-free mass</p>                                                                                                                                                                                                                                                                                                                                        |
|                       | Guilty feelings                                                                                                                                                                                                                                                                                                                                                                                                                                                                                                                                                                                                       |

rs738288

Height

IGP40

Worry too long after embarrassment

| PC3            |                                                                                                                                                                                                                                                      |
|----------------|------------------------------------------------------------------------------------------------------------------------------------------------------------------------------------------------------------------------------------------------------|
| SNP (lead SNP) | Trait                                                                                                                                                                                                                                                |
| rs7536458      | Basal metabolic rate<br>Forced expiratory volume in 1 sec<br>Hair or balding pattern<br>Height<br>Hip circumference<br>Infant length<br>Leg impedance<br>Waist circumference<br>Waist hip ratio<br>Whole body fat-free mass<br>Whole body water mass |
| rs10923724     | BMI<br>Hair or balding pattern<br>Height<br>Impedance<br>Relative age of first facial hair<br>Waist circumference<br>Waist hip ratio                                                                                                                 |
| rs9425301      | Height<br>Hip circumference<br>Immature fraction of reticulocytes<br>Mean platelet volume<br>Platelet distribution width<br>Waist circumference<br>Waist hip ratio                                                                                   |

|                       |                                                                                                                                                                                                                                                                                 |
|-----------------------|---------------------------------------------------------------------------------------------------------------------------------------------------------------------------------------------------------------------------------------------------------------------------------|
|                       | Whole body water mass                                                                                                                                                                                                                                                           |
| rs2274432             | Basal metabolic rate<br>Forced expiratory volume in 1 sec<br>Forced vital capacity<br>Hand grip strength<br>Height<br>Hip circumference<br>Leg impedance<br>Myopia<br>Waist circumference<br>Weight<br>Whole body fat mass<br>Whole body fat-free mass<br>Whole body water mass |
| rs2791550 (rs2605108) | Body fat percentage<br>Falls in the last year<br>Hip circumference<br>Impedance<br>log Fasting insulin<br>Type II diabetes<br>Umbilical hernia<br>Waist circumference<br>Waist hip ratio<br>Whole body fat mass                                                                 |
|                       | Age at menarche<br>Body fat percentage<br>BMI<br>Childhood BMI                                                                                                                                                                                                                  |



|           |                                                                                                                                                                                                                                                                                                                                         |
|-----------|-----------------------------------------------------------------------------------------------------------------------------------------------------------------------------------------------------------------------------------------------------------------------------------------------------------------------------------------|
| rs6726261 | Childhood obesity<br>Forced expiratory volume in 1 sec<br>Forced vital capacity<br>Hand grip strength<br>Height<br>Hip circumference<br>Impedance<br>Obesity class 1<br>Obesity with early age of onset age 2<br>Standarized difference in height between age 8 years and adult<br>Waist circumference<br>Weight<br>Whole body fat mass |
| rs2289195 | Basal metabolic rate<br>Forced expiratory volume in 1 sec<br>Forced vital capacity<br>Hand grip strength<br>Height<br>Leg impedance<br>Waist circumference<br>Whole body fat-free mass<br>Whole body water mass                                                                                                                         |
| rs6715793 | Forced expiratory volume in 1 sec<br>Height<br>Impedance<br>Waist circumference                                                                                                                                                                                                                                                         |
|           | Basal metabolic rate<br>Forced expiratory volume in 1 sec                                                                                                                                                                                                                                                                               |

|           |                                                                                                                                                                                                                                                                                                                                                                                                                                                                                                                 |
|-----------|-----------------------------------------------------------------------------------------------------------------------------------------------------------------------------------------------------------------------------------------------------------------------------------------------------------------------------------------------------------------------------------------------------------------------------------------------------------------------------------------------------------------|
| rs3791675 | <p>Forced vital capacity</p> <p>Height</p> <p>Hip circumference</p> <p>Impedance</p> <p>Inguinal hernia</p> <p>Mononeuropathies of upper limb</p> <p>Peak expiratory flow</p> <p>Waist circumference</p> <p>Weight</p> <p>Whole body fat mass</p> <p>Whole body fat-free mass</p> <p>Whole body water mass</p>                                                                                                                                                                                                  |
| rs1128249 | <p>Body fat percentage</p> <p>BMI</p> <p>Diabetes diagnosed by doctor</p> <p>HDL cholesterol</p> <p>Hemoglobin concentration</p> <p>High density lipoprotein</p> <p>High light scatter percentage of red cells</p> <p>High light scatter reticulocyte percentage of red cells</p> <p>Hip circumference</p> <p>Illness of mother: diabetes</p> <p>Illness of siblings: diabetes</p> <p>Impedance</p> <p>LDL cholesterol</p> <p>log Fasting insuline</p> <p>Low density lipoprotein</p> <p>Reticulocyte count</p> |

|           |                                                                                                                                                                                                             |
|-----------|-------------------------------------------------------------------------------------------------------------------------------------------------------------------------------------------------------------|
|           | Self-reported diabetes<br>Total cholesterol<br>Treatment with metformin<br>Triglycerides<br>Type II diabetes<br>Waist circumference<br>Waist hip ratio<br>Weight<br>Whole body fat mass                     |
| rs2342296 | Basal metabolic rate<br>Forced expiratory volume in 1 sec<br>Height<br>Waist circumference<br>Whole body fat-free mass<br>Whole body water mass                                                             |
| rs2920499 | Height<br>Lymphocyte count<br>Mean corpuscular hemoglobin concentration<br>Mean corpuscular volume<br>Platelet count<br>Plateletcrit<br>Red cell distribution width<br>Total cholesterol<br>Waist hip ratio |
|           | Adiponectin levels<br>Age at menarche<br>Bipolar disorder<br>BMI                                                                                                                                            |

rs2710323

Cross disorder  
Glaucoma primary open angle  
Hematocrit  
Hemoglobin concentration  
High light scatter reticulocyte percentage of red cells  
High light scatter reticulocyte count  
Hip circumference  
Hip osteoarthritis  
Impedance  
log Adiponectin  
Nervous feelings  
Pulse rate  
Red blood cell count  
Red cell distribution width  
Reticulocyte count  
Reticulocyte fraction of red count  
Schizophrenia  
Schizophrenia schizoaffective disorder or bipolar disorder  
Waist circumference  
Waist hip ratio  
Whole body water mass  
Worrier or anxious feeling

rs9864077

Advanced age related macular degeneration  
Age-related macular degeneration  
Arm impedance  
Body fat percentage  
BMI  
Hip circumference

|           |                                                                                                                                                                                                                                                                                                                                                                                                                                                      |
|-----------|------------------------------------------------------------------------------------------------------------------------------------------------------------------------------------------------------------------------------------------------------------------------------------------------------------------------------------------------------------------------------------------------------------------------------------------------------|
|           | Type II diabetes<br>Waist circumference<br>Waist hip ratio<br>Whole body fat mass                                                                                                                                                                                                                                                                                                                                                                    |
| rs9838625 | Allergic disease<br>Basal metabolic rate<br>Forced expiratory volume in 1 sec<br>Forced vital capacity<br>Hair or balding pattern<br>Hayfever, allergic rhinitis or eczema<br>Height<br>Hip circumference<br>Lymphocyte count<br>Mean corpuscular hemoglobin<br>Mean corpuscular volume<br>Myopia<br>Pulse rate<br>Red blood cell count<br>Waist circumference<br>Weight<br>Whole body fat mass<br>Whole body fat-free mass<br>Whole body water mass |
| rs1545854 | Birth weight<br>Heel bone mineral density<br>Height<br>Leg impedance                                                                                                                                                                                                                                                                                                                                                                                 |
|           | Age at first live birth                                                                                                                                                                                                                                                                                                                                                                                                                              |

rs4057984

Basal metabolic rate  
Birth weight  
Body fat percentage  
Diastolic blood pressure  
Fluid intelligence score  
Forced expiratory volume in 1 sec  
Forced vital capacity  
Hand grip strength  
Height  
Hip circumference  
Number of treatments or medications taken  
Peak expiratory flow  
Peritonsillar abscess  
Qualifications: A levels or as levels or equivalent  
Qualifications: college or university degree  
Self-reported hypertension  
Systolic blood pressure  
Time spent watching tv  
Vascular or heart problems diagnosed by doctor: high blood pressure  
Vascular or heart problems diagnosed by doctor: none of the above  
Waist circumference  
Weight  
Whole body fat-free mass  
Whole body water mass

---

Basal metabolic rate  
Forced expiratory volume in 1 sec  
Height  
Hip circumference

|           |                                                                                                                                                                                                                                                                                                                                 |
|-----------|---------------------------------------------------------------------------------------------------------------------------------------------------------------------------------------------------------------------------------------------------------------------------------------------------------------------------------|
| rs1115919 | <p>Leg impedance</p> <p>Overall health rating</p> <p>Standardized difference in height between age 8 years and adult</p> <p>Waist circumference</p> <p>Weight</p> <p>Whole body fat mass</p> <p>Whole body fat-free mass</p> <p>Whole body water mass</p>                                                                       |
| rs7689420 | <p>Basal metabolic rate</p> <p>Forced expiratory volume in 1 sec</p> <p>Forced vital capacity</p> <p>Hand grip strength</p> <p>Height</p> <p>Hip circumference</p> <p>Peak expiratory flow</p> <p>Waist circumference</p> <p>Weight</p> <p>Whole body fat mass</p> <p>Whole body fat-free mass</p> <p>Whole body water mass</p> |
|           | <p>Asthma</p> <p>Atopic dermatitis</p> <p>Basal metabolic rate</p> <p>Basophil count</p> <p>Eosinophil count</p> <p>Eosinophil percentage of granulocytes</p> <p>Eosinophil percentage of white cells</p> <p>Granulocyte count</p>                                                                                              |

|           |                                                                                                                                                                                                                                                                                                                                                                                                                                                                                                                                                                                                                                                                                                                                                                                                                                                                                         |
|-----------|-----------------------------------------------------------------------------------------------------------------------------------------------------------------------------------------------------------------------------------------------------------------------------------------------------------------------------------------------------------------------------------------------------------------------------------------------------------------------------------------------------------------------------------------------------------------------------------------------------------------------------------------------------------------------------------------------------------------------------------------------------------------------------------------------------------------------------------------------------------------------------------------|
| rs272885  | <p>Hand grip strength</p> <p>Height</p> <p>High light scatter percentage of red cells</p> <p>High light scatter reticulocyte count</p> <p>Inmature fraction of reticulocytes</p> <p>Mean platelet volume</p> <p>Monocyte count</p> <p>Myeloid white cell count</p> <p>Neutrophil count</p> <p>Neutrophil percentage of granulocytes</p> <p>No blood, clot, bronchitis, emphysema, asthma, rhinitis, eczema or allergy diagnosed by doctor</p> <p>Platelet count</p> <p>Self-reported asthma</p> <p>Self-reported hypertension</p> <p>Sum basophil neutrophil counts</p> <p>Sum eosinophil basophil counts</p> <p>Sum neutrophil eosinophil counts</p> <p>Time spent using computer</p> <p>Vascular or heart problems diagnosed by doctor: high blood pressure</p> <p>Waist circumference</p> <p>White blood cell count</p> <p>Whole body fat-free mass</p> <p>Whole body water mass</p> |
| rs6556301 | <p>Activated partial thromboplastin time</p> <p>Height</p> <p>Impedance</p> <p>Waist circumference</p> <p>Waist hip ratio</p>                                                                                                                                                                                                                                                                                                                                                                                                                                                                                                                                                                                                                                                                                                                                                           |



|           |                                                                                                                                                                                                                                                                                                                                                                   |
|-----------|-------------------------------------------------------------------------------------------------------------------------------------------------------------------------------------------------------------------------------------------------------------------------------------------------------------------------------------------------------------------|
| rs6556301 | Activated partial thromboplastin time<br>Height<br>Impedance<br>Waist circumference<br>Waist hip ratio                                                                                                                                                                                                                                                            |
| rs1294421 | Hip circumference<br>Inguinal hernia<br>Waist circumference<br>Waist hip ratio                                                                                                                                                                                                                                                                                    |
| rs1776897 | Basal metabolic rate<br>Birth weight<br>Birth weight of first child<br>BMI<br>Forced expiratory volume in 1 sec<br>Forced vital capacity<br>Height<br>Hip circumference<br>Peak expiratory flow<br>Platelet count<br>Plateletcrit<br>Waist circumference<br>Waist hip ratio<br>Weight<br>Whole body fat mass<br>Whole body fat-free mass<br>Whole body water mass |
|           | Age at menarche<br>Basal metabolic rate                                                                                                                                                                                                                                                                                                                           |

rs7759938

Forced expiratory volume in 1 sec  
Forced vital capacity  
Hand grip strength  
Height  
Hip circumference  
Impedance  
log Fasting insulin  
Medication for cholesterol, blood pressure or diabetes: blood pressure medication  
Medication for pain relief, constipation, heartburn: none of the above  
Menarche  
Menarche age at onset  
Number of operations  
Number of treatments or medications taken  
Pubertal anthropometrics  
Pubertal height growth  
Relative age voice broke  
Sleeplessness or insomnia  
Standardized difference in height between age 14 years and adult  
Tanner stage  
Waist circumference  
Weight  
Whole body fat mass  
Whole body fat-free mass  
Whole body water mass  
Fracture of forearm  
Fractured bone site: wrist  
Fractured or broken bones in last 5 years  
Heel bone mineral density

|           |                                                                                                                                                                                                                                                                                                                                          |
|-----------|------------------------------------------------------------------------------------------------------------------------------------------------------------------------------------------------------------------------------------------------------------------------------------------------------------------------------------------|
| rs1936809 | Hematocrit<br>Hemoglobin concentration<br>High density lipoprotein<br>High light scatter reticulocyte count<br>Hip circumference<br>Lymphocyte count<br>Other orthopaedic follow-up care<br>Red blood cell count<br>Reticulocyte count<br>Triglycerides<br>Varicose veins of lower extremities<br>Waist circumference<br>Waist hip ratio |
| rs7798002 | Basal metabolic rate<br>Height<br>Waist circumference<br>Waist hip ratio<br>Whole body fat-free mass<br>Whole body water mass                                                                                                                                                                                                            |
| rs7801581 | Height<br>Waist circumference<br>Waist hip ratio                                                                                                                                                                                                                                                                                         |
| rs1516883 | Age at menarche<br>BMI<br>Forced expiratory volume in 1 sec<br>Forced vital capacity<br>Height<br>Impedance                                                                                                                                                                                                                              |

|           |                                                                                                                                                                                                                               |
|-----------|-------------------------------------------------------------------------------------------------------------------------------------------------------------------------------------------------------------------------------|
|           | Relative age of first facial hair<br>Relative age voice broke<br>Standarized difference in height between age 14 years and adult<br>Waist circumference                                                                       |
| rs7021911 | Basal metabolic rate<br>Femoral neck bone mineral density<br>Forced expiratory volume in 1 sec<br>Heel bone mineral density<br>Height<br>Whole body fat-free mass<br>Whole body water mass                                    |
| rs1628023 | Basal metabolic rate<br>Diabetes diagnosed by doctor<br>Height<br>Monocyte percentage of white cells<br>Self-reported diabetes<br>Waist circumference<br>Weight<br>Whole body fat-free mass<br>Whole body water mass          |
|           | Allergic disease<br>Basophil count<br>Diastolic blood pressure<br>Granulocyte count<br>Hayfever, allergic rhinitis or eczema<br>Height<br>High light scatter percentage of red cells<br>High light scatter reticulocyte count |

rs7917772

Leg impedance  
Mean corpuscular hemoglobin  
Mean corpuscular hemoglobin  
Myeloid white cell count  
Neutrophil count  
No blood, clot, bronchitis, emphysema, asthma, rhinitis, eczema or allergy diagnosed by doctor  
Past tobacco smoking  
Reticulocyte fraction of red cells  
Sum basophil neutrophil counts  
Sum neutrophil eosinophil counts  
Sum eosinophil basophil counts  
Waist circumference  
Waist hip ratio  
White blood cell count

Age at menarche  
Alcohol intake frequency  
Birth weight  
Body fat percentage  
BMI  
Current tobacco smoking  
Fluid intelligence score  
Forced expiratory volume in 1 sec  
Forced vital capacity  
Frequency of depressed mood in last 2 weeks  
Gene expression  
Granulocyte count  
Granulocyte percentage of myeloid white cells  
Hand grip strength

|                        |                                    |
|------------------------|------------------------------------|
| rs1317149 (rs12787112) | HDL cholesterol                    |
|                        | Height                             |
|                        | High density lipoprotein           |
|                        | Hip circumference                  |
|                        | Immature fraction of reticulocytes |
|                        | log Proinsulin                     |
|                        | Loneliness, isolation              |
|                        | Miserableness                      |
|                        | Monocyte percentage of white cells |
|                        | Mood swings                        |
|                        | Neuroticism                        |
|                        | Neutrophil count                   |
|                        | Platelet count                     |
|                        | Plateletcrit                       |
|                        | Sleeplessness or insomnia          |
|                        | Smoking status: current            |
|                        | Suffer from nerves                 |
|                        | Sum basophil neutrophil counts     |
|                        | Sum neutrophil eosinophil counts   |
|                        | Total cholesterol                  |
|                        | Usual walking pace                 |
|                        | Waist circumference                |
|                        | White blood cell count             |
|                        | Whole body fat mass                |
| rs7949030              | Forced expiratory volume in 1 sec  |
|                        | Forced vital capacity              |
|                        | Impedance                          |
|                        | Pulse rate                         |

|        |                                                                                        |
|--------|----------------------------------------------------------------------------------------|
|        | Waist hip ratio                                                                        |
| rs8756 | Alcohol intake frequency                                                               |
|        | Basal metabolic rate                                                                   |
|        | Birth weight                                                                           |
|        | Birth weight of first child                                                            |
|        | Birthlength                                                                            |
|        | BMI                                                                                    |
|        | Diabetes diagnosed by doctor                                                           |
|        | Estimated total intracranial volume excluding patients with neuropsychiatric disorders |
|        | Forced expiratory volume in 1 sec                                                      |
|        | Forced vital capacity                                                                  |
|        | Hand grip strength                                                                     |
|        | Height                                                                                 |
|        | Hip circumference                                                                      |
|        | Impedance                                                                              |
|        | Infant head circumference                                                              |
|        | Intracranial volume                                                                    |
|        | Maternal effects on offspring birthweight                                              |
|        | Overall health rating                                                                  |
|        | Peak expiratory flow                                                                   |
|        | Pulse rate                                                                             |
|        | Self-reported diabetes                                                                 |
|        | Self-reported high cholesterol                                                         |
|        | Systolic blood pressure                                                                |
|        | Treatment with metformin                                                               |
|        | Waist circumference                                                                    |
|        | Weight                                                                                 |
|        | Whole body fat mass                                                                    |

|            |                                       |
|------------|---------------------------------------|
|            | Whole body fat-free mass              |
|            | Whole body water mass                 |
| rs12303671 | Adiponectin levels                    |
|            | Body fat percentage                   |
|            | BMI                                   |
|            | Hand grip strength                    |
|            | HDL cholesterol                       |
|            | Heel bone mineral density             |
|            | High density lipoprotein              |
|            | High light scatter reticulocyte count |
|            | Hip circumference                     |
|            | Impedance                             |
|            | log Adiponectin                       |
|            | Lymphocyte count                      |
|            | Reticulocyte count                    |
|            | Reticulocyte fraction of red cells    |
|            | Triglycerides                         |
|            | Waist circumference                   |
|            | Waist hip ratio                       |
|            | White blood cell count                |
|            | Whole body fat mass                   |
| rs7492628  | Basal metabolic rate                  |
|            | BMI                                   |
|            | Hip circumference                     |
|            | Impedance                             |
|            | Pulse rate                            |
|            | Waist hip ratio                       |
|            | Weight                                |



|                         |                                                                                                                                                                                       |
|-------------------------|---------------------------------------------------------------------------------------------------------------------------------------------------------------------------------------|
|                         | Whole body fat mass<br>Whole body fat-free mass<br>Whole body water mass                                                                                                              |
| rs16976826 (rs12443429) | Waist circumference<br>Waist hip ratio                                                                                                                                                |
| rs12440667              | Exfoliation glaucoma<br>Forced expiratory volume in 1 sec<br>Forced vital capacity<br>Hand grip strength<br>Height<br>Impedance<br>Peak expiratory flow<br>Waist circumference        |
| rs6602997               | Body fat percentage<br>Forced expiratory volume in 1 sec<br>Forced vital capacity<br>Height<br>Hip circumference<br>Impedance<br>Waist circumference<br>Weight<br>Whole body fat mass |
| rs2280470               | Arm impedance<br>Basal metabolic rate<br>Forced expiratory volume in 1 sec<br>Forced vital capacity<br>Height<br>Hip circumference                                                    |

|             |                                                                                                                                                                                                                                                |
|-------------|------------------------------------------------------------------------------------------------------------------------------------------------------------------------------------------------------------------------------------------------|
| rs132280470 | <p>Infant length</p> <p>Waist circumference</p> <p>Weight</p> <p>Whole body fat mass</p> <p>Whole body fat-free mass</p> <p>Whole body water mass</p>                                                                                          |
| rs1879143   | <p>Forced expiratory volume in 1 sec</p> <p>Hair or balding pattern</p> <p>Height</p> <p>Peak expiratory flow</p> <p>Trunk fat-free mass</p> <p>Waist circumference</p>                                                                        |
| rs9892365   | <p>Basal metabolic rate</p> <p>Forced expiratory volume in 1 sec</p> <p>Gene expression</p> <p>Height</p> <p>Systolic blood pressure</p> <p>Waist circumference</p> <p>Weight</p> <p>Whole body fat-free mass</p> <p>Whole body water mass</p> |
|             | <p>Acute pharyngitis</p> <p>Basal metabolic rate</p> <p>Forced expiratory volume in 1 sec</p> <p>Hand grip strength</p> <p>Heel bone mineral density</p> <p>Height</p> <p>Hip circumference</p>                                                |

|           |                                                                                                                                                                                                                                                                                                        |
|-----------|--------------------------------------------------------------------------------------------------------------------------------------------------------------------------------------------------------------------------------------------------------------------------------------------------------|
| rs4239436 | Mean platelet volume<br>Platelet count<br>Platelet distribution width<br>Waist circumference<br>Waist hip ratio<br>Weight<br>Whole body fat mass<br>Whole body fat-free mass<br>Whole body water mass                                                                                                  |
| rs6140050 | BMI<br>Forced expiratory volume in 1 sec<br>Heel bone mineral density<br>Height<br>High light scatter reticulocyte count<br>Impedance<br>Lung function FVC<br>Platelet count<br>Plateletcrit<br>Snoring<br>Waist circumference<br>Waist hip ratio<br>Whole body fat-free mass<br>Whole body water mass |
| rs2179129 | Arm impedance<br>Diastolic blood pressure<br>Hair or balding pattern<br>Systolic blood pressure<br>Vascular or heart problems diagnosed by doctor: high blood pressure<br>Waist circumference<br>Waist hip ratio                                                                                       |
