# Supplementary material for: Body Shape Phenotypes and Breast Cancer Risk: A Mendelian Randomization Analysis
Source: Cancers (Basel). 2023 Feb 17;15(4):1296. doi: 10.3390/cancers15041296 (PMC9954632; doi:10.3390/cancers15041296)
Supplement: Supplementary file 1 [file cancers-15-01296-s001.zip]

Archive with 4 entries (4 files):
- Supplementary_Figures_Tables.pdf
- Supplementary_File_S1.xlsx
- Supplementary_File_S2.docx
- Supplementary_File_S3.pdf
