# Supplementary material for: Body Shape Phenotypes and Breast Cancer Risk: A Mendelian Randomization Analysis
Source: Cancers (Basel). 2023 Feb 17;15(4):1296. doi: 10.3390/cancers15041296 (PMC9954632; doi:10.3390/cancers15041296)
Supplement: Supplementary file 1 [file cancers-15-01296-s001.zip › Supplementary_File_S1.xlsx]

## Sheet: Genetic_instruments_body_shapes
Genetic instruments for body shape phenotypes
								EAF	1st stage meta analysis						2nd stage meta analysis						1st + 2nd stage combined meta analysis
							alleles	1st stage
SNP (lead SNP)	trait	Chr	pos	gene	genes within 60kb	next gene	effect/other	mean	beta	se(beta)	pval (GC)	N	I2	pval(het)	beta	se(beta)	pval	N	I2	pval(het)	beta	se(beta)	pval	N	I2	pval(het)
rs1841499	avPC1	1	72609044	.	.	NEGR1	T/A	0.6167	0.0553	0.0093	2.71e-09	132467	0	0.7599	0.0423	0.0343	0.2172	7733.99	43.2	0.04861	0.0544	0.009	1.346e-09	140201	0	0.513
rs1514175 (rs1514174)	avPC1	1	74764232	TNNI3K	C1orf173,TNNI3K	TNNI3K	A/G	0.4284	0.0438	0.0093	2.461e-06	128836	31.6	0.00496	0.0445	0.0143	0.001819	39896	15.2	0.2083	0.044	0.0078	1.654e-08	168732	26	0.006825
rs12401738	avPC1	1	78219349	.	DNAJB4,FUBP1,NEXN	FUBP1	A/G	0.353	0.06	0.0094	1.817e-10	132486	18.3	0.08624	0.0496	0.0149	0.0008827	39886	4.2	0.3964	0.057	0.008	7.251e-13	172372	13.4	0.1196
rs11165643	avPC1	1	96696685	.	.	PTBP2	T/C	0.5822	0.0515	0.0092	2.048e-08	130910	0.1	0.4769	0.0444	0.0144	0.002021	39878	11.8	0.2627	0.0494	0.0078	1.802e-10	170788	2.9	0.3941
rs633715	avPC1	1	176119203	.	SEC16B	SEC16B	C/T	0.1958	0.0933	0.0113	1.883e-16	132398	13.5	0.1615	0.0884	0.022	5.651e-05	25423	0	0.6731	0.0923	0.0101	4.297e-20	157821	6	0.3059
rs11127483	avPC1	2	613691	.	TMEM18	TMEM18	A/G	0.8192	0.1125	0.0119	3.38e-21	132289	0	0.6182	0.1193	0.0422	0.004678	7734	45.3	0.03824	0.113	0.0115	5.833e-23	140023	4.5	0.3573
rs12986742	avPC1	2	58828647	.	.	FANCL	C/T	0.4712	0.0474	0.009	1.209e-07	132481	0	0.803	0.0857	0.0323	0.008028	7731	2.8	0.4185	0.0502	0.0087	7.227e-09	140212	0	0.7716
rs7570971 (rs1375131)	avPC1	2	135554376	RAB3GAP1	YSK4,RAB3GAP1	RAB3GAP1	C/A	0.6425	0.0551	0.0102	6.666e-08	128806	0	0.7611	0.0326	0.0153	0.03312	38394	0	0.7715	0.0482	0.0085	1.374e-08	167200	0	0.8471
rs3911063	avPC1	3	85989618	CADM2	CADM2	CADM2	T/C	0.6594	0.0494	0.0095	2.135e-07	132041	14.3	0.1478	0.0633	0.0354	0.07404	7723	7.3	0.3727	0.0503	0.0092	4.117e-08	139764	12.5	0.1652
rs7640424	avPC1	3	109302753	.	IFT57,CD47	CD47	C/T	0.6855	0.05	0.01	5.401e-07	131641	0	0.9996	0.0492	0.0155	0.001459	39903	6.5	0.3542	0.0498	0.0084	3.175e-09	171544	0	0.9931
rs1582874	avPC1	3	142597909	ZBTB38	ZBTB38	ZBTB38	C/T	0.4453	0.0564	0.009	3.035e-10	132284	13.4	0.1644	0.038	0.0335	0.2566	7734	0	0.7622	0.0552	0.0087	2.205e-10	140018	7.7	0.2742
rs7647305	avPC1	3	187316984	.	DGKG,ETV5	ETV5	C/T	0.7964	0.059	0.0113	1.951e-07	132548	9	0.2566	0.0558	0.0181	0.002036	38411	0	0.7125	0.0581	0.0096	1.348e-09	170959	0.9	0.4539
rs10938397	avPC1	4	44877284	.	.	GNPDA2	G/A	0.4349	0.0658	0.0094	2.701e-12	126953	0	0.6819	0.066	0.0143	4.228e-06	39853	0	0.5857	0.0659	0.0079	5.09e-17	166806	0	0.7582
rs2307111	avPC1	5	75039434	C5orf37	C5orf37	C5orf37	T/C	0.5947	0.0637	0.0092	4.022e-12	128296	33.1	0.003012	0.0174	0.0143	0.2257	39894	0	0.9386	0.0501	0.0077	9.095e-11	168190	21.7	0.02314
rs943466 (rs2281819)	avPC1	6	33839765	.	C6orf125,IHPK3,MLN,LEMD2	LEMD2	G/A	0.7587	0.0525	0.0105	6.386e-07	132278	16.3	0.1143	0.0397	0.0164	0.01566	39896	0	0.9559	0.0488	0.0088	3.465e-08	172174	0.8	0.4577
rs987237	avPC1	6	50911009	TFAP2B	TFAP2B	TFAP2B	G/A	0.1821	0.0743	0.012	6.31e-10	132416	21.6	0.05052	0.0566	0.0183	0.002039	39898	4.7	0.3859	0.069	0.01	6.253e-12	172314	15.8	0.08052
rs9398172	avPC1	6	109101519	FOXO3	FOXO3	FOXO3	A/G	0.6965	0.0466	0.0096	1.328e-06	132451	12	0.1904	0.1327	0.0349	0.0001449	7733	21.1	0.2297	0.0527	0.0093	1.28e-08	140184	16.9	0.08998
rs7103411	avPC1	11	27656701	BDNF	BDNF	BDNF	T/C	0.7847	0.0694	0.0109	1.814e-10	132496	0	0.7	0.0875	0.0175	5.419e-07	39900	0	0.9114	0.0745	0.0093	8.427e-16	172396	0	0.8958
rs297924	avPC1	12	48571328	FAIM2	FAIM2,BCDIN3D,AQP2	FAIM2	C/T	0.4003	0.0542	0.0094	8.425e-09	132551	0	0.9338	0.0438	0.0347	0.2071	7729.01	0	0.896	0.0535	0.0091	3.738e-09	140280	0	0.9748
rs7970350	avPC1	12	64646431	.	HMGA2	HMGA2	C/T	0.5049	0.0582	0.0091	1.392e-10	132437	0	0.4827	0.0088	0.0141	0.5315	39900	30.3	0.0404	0.0437	0.0076	1.116e-08	172337	16.7	0.06768
rs4883723	avPC1	13	52982033	.	.	OLFM4	A/G	0.1496	0.0669	0.0133	4.574e-07	127084	7.6	0.2909	0.0916	0.0206	8.7e-06	39898	0	0.6149	0.0742	0.0112	3.186e-11	166982	2.2	0.4146
rs7141420	avPC1	14	78969207	NRXN3	NRXN3	NRXN3	T/C	0.5246	0.0527	0.0091	6.235e-09	128231	26.4	0.01998	0.0482	0.0144	0.000803	39064	0	0.6462	0.0514	0.0077	2.329e-11	167295	16.5	0.07344
rs4776970	avPC1	15	65867940	MAP2K5	MAP2K5,LBXCOR1	MAP2K5	A/T	0.6353	0.048	0.0093	2.429e-07	132529	4	0.3771	0.0913	0.0313	0.003529	8653.01	0	0.9366	0.0515	0.0089	7.545e-09	141182	0	0.5695
rs12446632	avPC1	16	19842890	.	GPRC5B	GPRC5B	G/A	0.8639	0.0799	0.0133	1.708e-09	132557	24.6	0.02761	0.0292	0.021	0.1647	39860	0	0.9295	0.0654	0.0112	5.911e-09	172417	12.4	0.1396
rs11074446 (rs7188545)	avPC1	16	20162624	.	.	GP2	T/C	0.8559	0.0641	0.0135	2.023e-06	120798	0	0.6796	0.0611	0.0201	0.002378	39879	3.4	0.4098	0.0632	0.0112	1.736e-08	160677	0	0.6528
rs8049439	avPC1	16	28745016	ATXN2L	ATXN2L,ATP2A1,LOC440350,TUFM,SH2B1	ATXN2L	C/T	0.4084	0.0602	0.0091	3.196e-11	132558	21.4	0.05159	0.0384	0.0318	0.2274	8700	0	0.6242	0.0585	0.0087	2.197e-11	141258	16.5	0.0928
rs12597511	avPC1	16	31052720	PRSS8	FUS,VKORC1,ZNF646,POL3S,PRSS36,BCKDK,PRSS8,MYST1,ZNF668	PRSS8	C/T	0.6252	0.0568	0.0103	3.684e-08	106927	0	0.6325	0.0345	0.0148	0.01992	38665	0	0.6435	0.0495	0.0085	4.688e-09	145592	0	0.698
rs1121980	avPC1	16	52366748	FTO	FTO	FTO	A/G	0.4294	0.1552	0.0092	4.496e-64	111843	45.4	9.612e-06	0.1462	0.0143	1.398e-24	39897	0	0.8066	0.1526	0.0077	1.49e-86	151740	32.5	0.000541
rs969438	avPC1	18	38194401	.	.	PIK3C3	A/G	0.3237	0.0532	0.0098	4.863e-08	132459	0	0.6935	0.0536	0.0349	0.1242	7734	0	0.4633	0.0532	0.0094	1.684e-08	140193	0	0.7181
rs6567160	avPC1	18	55980115	.	.	MC4R	C/T	0.2351	0.1118	0.0107	9.555e-26	132376	17.7	0.09323	0.0685	0.0168	4.507e-05	39901	0	0.7077	0.0993	0.009	3.684e-28	172277	11.6	0.1568
rs2284746	avPC2	1	17179262	MFAP2	SDHB,MFAP2,CROCC,ATP13A2	MFAP2	G/C	0.5243	0.0401	0.0052	1.544e-14	132340	9.7	0.2406	0.046	0.0178	0.009936	7733.99	19.4	0.2475	0.0406	0.005	4.407e-16	140074	10.1	0.2161
rs2903545	avPC2	1	23413695	.	HTR1D,LUZP1	HTR1D	T/C	0.6	0.0296	0.0051	6.485e-09	132855	0	0.7648	0.0184	0.0075	0.0139	39895	31.3	0.03436	0.0261	0.0042	6.453e-10	172750	5.8	0.3074
rs11209376	avPC2	1	41270935	SCMH1	CTPS,SCMH1,SLFNL1	SCMH1	G/A	0.2226	0.0328	0.006	5.881e-08	132815	8.9	0.2589	0.0331	0.0088	0.0001685	39903	12.9	0.2443	0.0329	0.005	3.231e-11	172718	8.4	0.2325
rs17391694	avPC2	1	78396214	.	GIPC2	GIPC2	T/C	0.1261	0.0478	0.0094	3.372e-07	111944	4.3	0.3744	0.0338	0.0115	0.003388	38449	0	0.7717	0.0422	0.0073	6.74e-09	150393	0	0.5906
rs7536458	avPC2	1	118666125	.	.	SPAG17	T/G	0.7491	0.0348	0.0058	2.127e-09	132894	1.6	0.4394	0.0419	0.0085	8.152e-07	39900	29.3	0.04644	0.0371	0.0048	1.038e-14	172794	11.2	0.1659
rs11205303	avPC2	1	148173037	MTMR11	SF3B4,OTUD7B,SV2A,HIST2H2AC,HIST2H2AB,MTMR11,HIST2H2BE,BOLA1	MTMR11	C/T	0.3801	0.0527	0.0063	5.142e-17	114710	0	0.7858	0.0492	0.0077	1.906e-10	39064	27	0.06866	0.0513	0.0049	6.961e-26	153774	1.4	0.4392
rs1752388 (rs2298265)	avPC2	1	149549465	PI4KB	ZNF687,SELENBP1,RFX5,PSMD4,PI4KB	PI4KB	A/C	0.8763	0.0366	0.0077	2.061e-06	132893	26.1	0.01995	0.038	0.0117	0.001181	39070	34.5	0.02241	0.037	0.0064	8.611e-09	171963	27.9	0.00373
rs905938	avPC2	1	153258013	DCST2	FLAD1,CKS1B,SHC1,EFNA3,PYGO2,ZBTB7B,DCST1,ADAM15,DCST2,EFNA4,LENEP	DCST2	C/T	0.2632	0.0397	0.0063	2.695e-10	128575	29.8	0.008243	0.0336	0.0085	7.861e-05	39900	25	0.08165	0.0375	0.0051	1.203e-13	168475	27.2	0.00452
rs11584955	avPC2	1	170404728	DNM3	DNM3	DNM3	A/C	0.3233	0.0366	0.0055	1.97e-11	128604	19.1	0.07863	0.0356	0.0227	0.1167	5412	0	0.6449	0.0365	0.0053	8.103e-12	134016	14.9	0.1272
rs1014719	avPC2	1	175069389	PAPPA2	PAPPA2,ASTN1	PAPPA2	T/G	0.5679	0.0286	0.0051	2.051e-08	132825	0	0.8833	0.0235	0.0075	0.001648	38410	0	0.7446	0.027	0.0042	1.562e-10	171235	0	0.9333
rs1046934	avPC2	1	182290152	C1orf19	GLT25D2,C1orf19	C1orf19	C/A	0.3661	0.0335	0.0055	8.249e-10	128638	16.1	0.1191	0.0348	0.0078	7.201e-06	38403	0	0.4889	0.0339	0.0045	4.389e-14	167041	9.9	0.1974
rs1415288	avPC2	1	217809168	.	.	SLC30A10	C/A	0.2819	0.0457	0.0057	9.978e-16	132704	0	0.6479	0.0284	0.0214	0.184	6242	41.9	0.06986	0.0446	0.0055	6.015e-16	138946	1.6	0.4379
rs12093031 (rs10799424)	avPC2	1	225810498	.	ZNF678	ZNF678	T/C	0.8204	0.0319	0.0065	1.008e-06	132736	19.4	0.07295	0.0251	0.0098	0.01046	38380	39.5	0.008103	0.0298	0.0054	3.68e-08	171116	25.9	0.007158
rs2278483	avPC2	2	24893586	CENPO	NCOA1,CENPO,LOC391356,ADCY3	ADCY3	T/C	0.2362	0.0387	0.0059	6.769e-11	132890	17.7	0.09413	0.0374	0.0086	1.3e-05	39900	0	0.8917	0.0383	0.0049	3.574e-15	172790	4.1	0.3561
rs1545552	avPC2	2	33213842	LTBP1	LTBP1	LTBP1	G/A	0.7239	0.0316	0.0059	9.904e-08	127413	0	0.8319	0.031	0.0082	0.0001617	39884	0	0.8913	0.0314	0.0048	5.546e-11	167297	0	0.951
rs6740539	avPC2	2	46858292	.	SOCS5	SOCS5	G/T	0.6961	0.0288	0.0056	2.388e-07	132893	0	0.6565	0.0193	0.0079	0.0148	39901	0	0.7722	0.0256	0.0046	2.041e-08	172794	0	0.8005
rs3791675	avPC2	2	55964813	EFEMP1	EFEMP1	EFEMP1	C/T	0.7566	0.0507	0.0058	2.694e-18	132729	12.8	0.1747	0.0621	0.0084	1.62e-13	39900	3.7	0.4051	0.0544	0.0048	4.489e-30	172629	9.6	0.2017
rs1913671	avPC2	2	88680998	EIF2AK3	EIF2AK3	EIF2AK3	C/T	0.3434	0.0326	0.0052	4.192e-10	132881	19.5	0.07172	0.013	0.0076	0.08631	39902	18.5	0.1585	0.0264	0.0043	8.255e-10	172783	20.6	0.02958
rs1478576	avPC2	2	217992769	.	.	TNS1	T/C	0.6666	0.0323	0.0055	3.217e-09	132840	0	0.7604	0.0459	0.0208	0.02725	6242	0	0.5344	0.0332	0.0053	4.328e-10	139082	0	0.7877
rs3103267	avPC2	2	232696826	DIS3L2	DIS3L2	DIS3L2	C/A	0.723	0.034	0.0057	2.343e-09	132863	12.3	0.1843	0.0426	0.0214	0.04619	6241.99	0	0.7288	0.0346	0.0055	3.467e-10	139105	7.3	0.2852
rs2270894	avPC2	3	9950386	.	TMEM111,IL17RC,CIDEC,PRRT3,CRELD1,JAGN1,IL17RE	IL17RC	C/G	0.7757	0.048	0.0091	1.474e-07	92782.9	12.3	0.2103	0.058	0.0302	0.05447	5759	0	0.8875	0.0488	0.0087	2.088e-08	98541.9	4.1	0.3799
rs2581830	avPC2	3	53109138	RFT1	RFT1,SFMBT1	RFT1	T/C	0.3966	0.0316	0.0051	5.796e-10	132841	4.9	0.3552	0.0136	0.0179	0.4474	7733	0	0.6736	0.0302	0.0049	6.955e-10	140574	1.4	0.4432
rs9833926	avPC2	3	56625218	CCDC66	CCDC66,C3orf63	C3orf63	A/G	0.5406	0.0285	0.005	1.058e-08	132870	0	0.7205	0.0311	0.0073	2.039e-05	39865	20.2	0.1365	0.0293	0.0041	1.16e-12	172735	0	0.4971
rs6439168	avPC2	3	130533633	.	H1FX,C3orf37,COPG	H1FX	G/A	0.7916	0.0408	0.0062	3.711e-11	132794	6.5	0.3151	0.0205	0.0212	0.3332	7730	0	0.5607	0.0392	0.006	4.473e-11	140524	4	0.3706
rs724016	avPC2	3	142588260	ZBTB38	ZBTB38	ZBTB38	G/A	0.4406	0.0745	0.0051	2.519e-48	128093	0	0.7764	0.0655	0.0074	7.627e-19	39903	40.2	0.005781	0.0716	0.0042	3.443e-65	167996	10.5	0.1821
rs13094143	avPC2	3	173456481	FNDC3B	FNDC3B	FNDC3B	T/C	0.3327	0.0337	0.0055	6.545e-10	128218	19.6	0.07166	0.0063	0.0211	0.7645	6236	53.5	0.01774	0.032	0.0053	1.92e-09	134454	25.6	0.01665
rs519384	avPC2	3	173651201	.	GHSR,TNFSF10,FNDC3B	GHSR	A/T	0.3011	0.0391	0.0057	6.518e-12	127706	0	0.9434	0.0275	0.0215	0.2014	6242	8.7	0.3609	0.0383	0.0055	3.442e-12	133948	0	0.9284
rs720390	avPC2	3	187031377	.	IGF2BP2	IGF2BP2	A/G	0.3841	0.0318	0.0055	5.594e-09	127428	23.9	0.03296	0.0346	0.0076	5.87e-06	38396	0	0.8868	0.0328	0.0045	1.938e-13	165824	10.2	0.1906
rs6853216	avPC2	4	17579753	LCORL	LCORL	LCORL	C/T	0.846	0.0789	0.0071	1.452e-28	128240	0	0.6834	0.0224	0.0236	0.3412	7733.01	57.6	0.005027	0.0742	0.0068	9.776e-28	135973	13.1	0.1534
rs4694504	avPC2	4	73715555	.	.	ADAMTS3	G/A	0.4695	0.0295	0.0051	7.288e-09	127938	0	0.7666	0.0095	0.0178	0.5939	7734	0	0.4922	0.028	0.0049	1.146e-08	135672	0	0.7609
rs1975474	avPC2	4	82397961	.	PRKG2	PRKG2	G/T	0.3165	0.0472	0.0056	2.518e-17	123933	7.5	0.2949	0.0394	0.0079	6.517e-07	39070	18.5	0.1646	0.0446	0.0046	1.665e-22	163003	10.5	0.187
rs1562975	avPC2	4	109628057	.	.	RPL34	A/G	0.301	0.0283	0.0056	3.842e-07	128128	17.7	0.09516	0.0228	0.0081	0.004722	39893	0	0.6143	0.0265	0.0046	8.532e-09	168021	9	0.2181
rs7689420	avPC2	4	145787802	HHIP	HHIP	HHIP	C/T	0.8351	0.0722	0.007	5.879e-25	128237	4.1	0.3768	0.059	0.0098	1.568e-09	39899	15.9	0.1965	0.0677	0.0057	1.297e-32	168136	7.4	0.2607
rs6450922	avPC2	5	32725475	.	NPR3	NPR3	C/G	0.7583	0.0437	0.0077	1.442e-08	115226	0	0.5511	0.041	0.009	5.208e-06	34875	17.8	0.1806	0.0426	0.0059	3.491e-13	150101	3.1	0.3907
rs7733331	avPC2	5	32864603	.	C5orf23,NPR3	C5orf23	T/C	0.3999	0.0312	0.0052	2.253e-09	128065	11.1	0.2109	0.0269	0.0158	0.08856	8704	0	0.9939	0.0308	0.0049	4.619e-10	136769	0	0.5106
rs6894139	avPC2	5	88363538	.	.	MEF2C	T/G	0.56	0.0277	0.0053	2.105e-07	123863	16.7	0.1109	0.0281	0.0073	0.0001279	39893	9.9	0.2944	0.0278	0.0043	8.537e-11	163756	13.2	0.1247
rs274567	avPC2	5	131742308	SLC22A5	LOC441108,SLC22A5,SLC22A4	SLC22A5	C/T	0.6046	0.0288	0.0052	3.418e-08	128165	0	0.8627	0.0429	0.018	0.01709	7726	0	0.8437	0.0299	0.005	2.199e-09	135891	0	0.9261
rs31198	avPC2	5	134400584	.	CATSPER3,PITX1	PITX1	T/C	0.7464	0.0363	0.0058	4.213e-10	128216	8.6	0.2659	0.0276	0.0084	0.001004	39897	0	0.5187	0.0335	0.0048	2.265e-12	168113	4.2	0.3542
rs4282339	avPC2	5	168188818	SLIT3	SLIT3	SLIT3	G/A	0.796	0.0348	0.0063	3.096e-08	127996	15	0.1361	0.0282	0.0092	0.002266	38405	0	0.7742	0.0327	0.0052	3.185e-10	166401	4.9	0.3348
rs153753	avPC2	5	171117576	.	.	FBXW11	G/A	0.6546	0.0342	0.0053	1.478e-10	128258	0	0.8622	0.0051	0.0204	0.8007	6235	0	0.6998	0.0324	0.0051	2.82e-10	134493	0	0.8792
rs4868126	avPC2	5	171216074	.	FBXW11	FBXW11	G/T	0.609	0.0277	0.0056	6.731e-07	123994	20.4	0.06351	0.0203	0.0076	0.007689	38397	0	0.8253	0.0251	0.0045	2.597e-08	162391	8.5	0.235
rs4868293	avPC2	5	172935497	.	FAM44B	FAM44B	A/G	0.465	0.0364	0.0059	8.364e-10	125264	12.2	0.1893	0.0546	0.0213	0.01042	6242	0	0.5399	0.0377	0.0057	3.359e-11	131506	9.4	0.2354
rs2714354	avPC2	6	7257636	SSR1	CAGE1,SSR1	SSR1	T/C	0.7506	0.0352	0.0071	7.565e-07	97640.7	2.4	0.4226	0.0256	0.0105	0.0151	25662	16.3	0.2158	0.0322	0.0059	4.433e-08	123303	6.4	0.3126
rs3812163	avPC2	6	7670759	.	BMP6	BMP6	T/A	0.4575	0.0296	0.0052	1.413e-08	128017	7.4	0.2939	0.0164	0.0178	0.3551	7734	0	0.572	0.0286	0.005	1.051e-08	135751	4.4	0.3623
rs806794	avPC2	6	26308656	.	HIST1H4E,HIST1H4F,HIST1H1D,HIST1H2AD,HIST1H2BD,HIST1H1E,HIST1H2BE,HIST1H3E,HIST1H2AE,HIST1H3D,HIST1H2BG,HIST1H2BH,HIST1H3F,HIST1H2BF,HIST1H4D,HIST1H4G	HIST1H2BF	A/G	0.7027	0.0564	0.0058	2.888e-22	123675	4.3	0.3708	0.0541	0.0079	6.663e-12	39897	31.6	0.03304	0.0556	0.0047	1.315e-32	163572	13.7	0.1158
rs2256183	avPC2	6	31488508	.	HLA-B,HCP5	HCP5	A/G	0.4526	0.048	0.0053	2.401e-19	124622	7.1	0.303	0.0565	0.018	0.001679	7734	0	0.9752	0.0487	0.0051	1.024e-21	132356	0	0.5568
rs9462007	avPC2	6	34823319	.	C6orf107,C6orf106,SNRPC	SNRPC	T/C	0.1527	0.0558	0.0072	1.235e-14	128149	22	0.04757	0.0573	0.0246	0.02001	7724	28.8	0.1554	0.0559	0.0069	5.857e-16	135873	22	0.03619
rs3734254	avPC2	6	35502988	PPARD	PPARD,TEAD3,FANCE,RPL10A	PPARD	T/C	0.798	0.0434	0.0075	6.318e-09	102584	1.5	0.4423	0.0619	0.0239	0.009504	6478.99	0	0.8174	0.0451	0.0072	3.041e-10	109063	0	0.5956
rs9357470	avPC2	6	45173591	SUPT3H	SUPT3H	RUNX2	T/C	0.4251	0.0306	0.0053	9.857e-09	127396	0	0.7236	0.026	0.0182	0.1513	7734	31.2	0.134	0.0302	0.0051	2.803e-09	135130	0	0.5861
rs12209223	avPC2	6	76221309	FILIP1	FILIP1	FILIP1	A/C	0.1147	0.0488	0.0085	1.101e-08	127924	5.3	0.3469	0.0533	0.0294	0.06981	7734	0	0.7011	0.0491	0.0082	1.757e-09	135658	0.2	0.4738
rs920842	avPC2	6	81905390	.	.	FAM46A	G/A	0.5348	0.0309	0.0051	1.373e-09	127899	0	0.7258	0.042	0.0178	0.01787	7734.01	0	0.6982	0.0317	0.0049	9.521e-11	135633	0	0.8026
rs314263	avPC2	6	105499438	.	LIN28B	LIN28B	C/T	0.32	0.04	0.0055	2.277e-13	126353	0	0.9919	0.0383	0.0189	0.04318	7731	17.6	0.266	0.0399	0.0053	4.377e-14	134084	0	0.9794
rs9488923 (rs2027850)	avPC2	6	116837768	DSE	FAM26F,DSE	DSE	A/G	0.3582	0.0257	0.0053	1.471e-06	128182	0	0.5388	0.0254	0.0077	0.0009934	39893	0	0.6513	0.0256	0.0044	4.502e-09	168075	0	0.6765
rs9388490	avPC2	6	126746488	.	C6orf173	C6orf173	T/C	0.4309	0.0445	0.0052	1.503e-17	128029	5.4	0.3429	0.0379	0.0199	0.05677	6242	30	0.1605	0.0441	0.005	1.932e-18	134271	7.9	0.2717
rs6569648	avPC2	6	130390812	L3MBTL3	L3MBTL3	L3MBTL3	C/T	0.2335	0.048	0.0062	7.106e-15	128234	2	0.4284	0.0529	0.0088	1.568e-09	38410	3.6	0.4065	0.0496	0.0051	1.229e-22	166644	1	0.4517
rs9389986	avPC2	6	142702807	GPR126	GPR126	GPR126	T/A	0.7128	0.0524	0.0057	3.449e-20	127859	30.9	0.005948	0.0586	0.0083	2.102e-12	38386	11	0.2802	0.0544	0.0047	5.522e-31	166245	24.8	0.01046
rs827423	avPC2	6	152197890	ESR1	ESR1	ESR1	G/A	0.4871	0.037	0.0053	4.142e-12	125993	19.7	0.07248	0.0486	0.02	0.01514	6235	0	0.7145	0.0378	0.0051	1.698e-13	132228	14.7	0.1296
rs1182199	avPC2	7	2829068	GNA12	GNA12	GNA12	C/A	0.6858	0.052	0.0056	1.078e-20	128040	0	0.564	0.0674	0.0192	0.0004519	7734.01	0	0.9505	0.0532	0.0054	4.281e-23	135774	0	0.7622
rs2192476	avPC2	7	19578830	.	.	TWISTNB	C/T	0.3727	0.0286	0.0053	8.394e-08	127930	2	0.4284	0.0394	0.0183	0.03153	7734	3.5	0.4115	0.0294	0.0051	7.375e-09	135664	1.2	0.447
rs506154	avPC2	7	28168604	JAZF1	JAZF1	JAZF1	T/C	0.2975	0.0406	0.0056	3.263e-13	128168	0	0.554	0.026	0.008	0.00108	39902	0.5	0.4609	0.0358	0.0046	6.036e-15	168070	0	0.5225
rs12673331	avPC2	7	46564586	.	.	IGFBP3	A/G	0.7153	0.0306	0.0062	6.999e-07	126761	0	0.6841	0.0231	0.0079	0.003656	39073	6.1	0.3636	0.0277	0.0049	1.287e-08	165834	0	0.6295
rs2282978	avPC2	7	92102346	CDK6	CDK6,FAM133B	CDK6	C/T	0.341	0.0548	0.0053	9.9e-25	128236	0.9	0.4571	0.0462	0.0077	2.036e-09	39898	0	0.9553	0.052	0.0044	9.429e-33	168134	0	0.8055
rs9650315	avPC2	8	57318152	.	RDHE2,CHCHD7,PLAG1	CHCHD7	G/T	0.8635	0.063	0.0078	8.423e-16	127684	0	0.9723	0.0382	0.0269	0.1551	7734	20.1	0.2401	0.0611	0.0075	3.554e-16	135418	0	0.9354
rs4130415	avPC2	8	130787894	.	MLZE	MLZE	T/C	0.797	0.0556	0.0066	5.718e-17	127928	2.8	0.4073	0.0434	0.0088	8.257e-07	39874	14.7	0.2153	0.0512	0.0053	3.06e-22	167802	6.6	0.2841
rs4909595	avPC2	8	135740900	ZFAT1	ZFAT1	ZFAT1	C/G	0.7411	0.0368	0.0058	2.421e-10	128128	18.1	0.09031	-0.0302	0.0204	0.1385	7734	39.9	0.06796	0.0318	0.0056	1.211e-08	135862	27.1	0.01077
rs9407763	avPC2	9	16360680	.	BNC2	BNC2	T/A	0.3294	0.0332	0.0057	5.492e-09	123465	0	0.5729	0.0071	0.0193	0.7121	7734	10.5	0.3398	0.0311	0.0055	1.269e-08	131199	0	0.51
rs11144688	avPC2	9	77732106	PCSK5	PCSK5	PCSK5	G/A	0.8887	0.054	0.0113	1.648e-06	116741	28.4	0.01465	0.0427	0.0113	0.0001592	38423	0	0.6751	0.0483	0.008	1.439e-09	155164	17.5	0.06673
rs7855177	avPC2	9	85571402	GKAP1	GKAP1,UBQLN1	GKAP1	A/G	0.2278	0.0317	0.0063	4.589e-07	127947	0	0.561	0.0561	0.0207	0.006825	7731.01	0	0.5824	0.0338	0.006	2.109e-08	135678	0	0.6002
rs3937594	avPC2	9	90071974	.	.	SPIN1	C/T	0.4267	0.0293	0.0055	7.862e-08	126649	5.6	0.3387	0.0493	0.0182	0.006742	7701	0	0.5169	0.031	0.0053	4.027e-09	134350	3.9	0.3739
rs7043114	avPC2	9	94427804	IPPK	CENPP,IPPK	CENPP	C/T	0.4431	0.0274	0.0051	7.77e-08	128253	30.1	0.007529	0.0576	0.0177	0.001126	7731.01	23.8	0.2031	0.0297	0.0049	1.332e-09	135984	29.9	0.004709
rs4448343	avPC2	9	97306191	PTCH1	PTCH1	PTCH1	G/A	0.3419	0.0341	0.0055	4.104e-10	128246	0	0.897	0.0438	0.0077	1.024e-08	39872	0	0.7386	0.0374	0.0045	6.745e-17	168118	0	0.928
rs2025151	avPC2	9	98201333	ZNF367	HABP4,ZNF367,SLC35D2	ZNF367	G/C	0.1806	0.0442	0.007	2.681e-10	127442	0	0.5601	0.0641	0.0238	0.007017	7733.99	27.4	0.1685	0.0458	0.0067	9.254e-12	135176	1.6	0.4374
rs4333673	avPC2	9	108650277	.	ZNF462	ZNF462	A/G	0.2284	0.0387	0.006	1.577e-10	128253	17.2	0.1027	0.0237	0.0087	0.006709	39889	0	0.6904	0.0339	0.0049	7.066e-12	168142	9.1	0.2153
rs7853634	avPC2	9	118161874	PAPPA	PAPPA	PAPPA	T/C	0.7876	0.0372	0.0063	3.265e-09	128228	0	0.8787	0.0519	0.022	0.01826	7729.99	0	0.5718	0.0383	0.0061	2.515e-10	135958	0	0.8961
rs7466269	avPC2	9	132453905	FUBP3	FUBP3	FUBP3	A/G	0.6397	0.0249	0.0053	3.083e-06	128252	36.5	0.0008983	0.0383	0.0076	4.085e-07	39896	0	0.9816	0.0293	0.0043	1.625e-11	168148	20.2	0.03282
rs4980067	avPC2	10	80806135	.	C10orf56,PPIF,ZMIZ1	C10orf56	C/A	0.4753	0.0298	0.0053	2.36e-08	127946	0	0.7287	0.0487	0.0179	0.006424	7734	0	0.4759	0.0313	0.0051	7.107e-10	135680	0	0.7245
rs1879671	avPC2	11	30311283	C11orf46	C11orf46	C11orf46	G/T	0.7291	0.0393	0.0066	3.282e-09	95535.2	8.6	0.2948	0.0172	0.0219	0.4336	6497	0	0.5893	0.0375	0.0063	3.069e-09	102032	5	0.3609
rs606452	avPC2	11	74953826	SERPINH1	MAP6,SERPINH1,GDPD5	SERPINH1	A/C	0.1433	0.0462	0.0077	2.065e-09	120223	1	0.4536	0.0446	0.0104	1.667e-05	39898	21.1	0.1246	0.0456	0.0062	1.656e-13	160121	5.8	0.3089
rs6487133	avPC2	12	20736419	.	PDE3A,SLCO1C1	SLCO1C1	A/G	0.3294	0.0317	0.0055	6.242e-09	127932	0	0.7783	-0.0004	0.0187	0.9818	7734	0	0.7613	0.0291	0.0053	3.325e-08	135666	0	0.8071
rs11049611	avPC2	12	28491511	CCDC91	CCDC91	CCDC91	C/T	0.6951	0.0348	0.0056	4.303e-10	128244	0	0.5856	0.0468	0.0197	0.0175	7732	51.1	0.01717	0.0357	0.0054	3.425e-11	135976	8.3	0.2607
rs1351394	avPC2	12	64638093	HMGA2	HMGA2	HMGA2	T/C	0.4928	0.0515	0.0051	5.653e-24	127877	13.6	0.1613	0.0466	0.0073	1.693e-10	39900	12.9	0.2444	0.0499	0.0042	7.881e-33	167777	12	0.1482
rs10748128	avPC2	12	68113925	.	FRS2,YEATS4	FRS2	T/G	0.3518	0.0422	0.0062	7.8e-12	113101	0	0.5802	0.0242	0.0077	0.001663	39883	23.4	0.09886	0.0351	0.0048	3.527e-13	152984	8.1	0.2474
rs11107116 (rs3825199)	avPC2	12	92502635	.	SOCS2	SOCS2	T/G	0.2264	0.056	0.006	2.089e-20	128223	12.6	0.1807	0.0542	0.0088	8.679e-10	39902	4.3	0.3937	0.0554	0.005	5.046e-29	168125	8.3	0.2366
rs11107169	avPC2	12	92650986	CRADD	CRADD	CRADD	G/A	0.5643	0.0407	0.0051	1.462e-15	127764	0	0.8732	0.0462	0.0178	0.009344	7734	0	0.6113	0.0411	0.0049	5.004e-17	135498	0	0.9016
rs7980687	avPC2	12	122388664	SBNO1	SETD8,SBNO1	SBNO1	A/G	0.1997	0.0388	0.0065	2.718e-09	128066	9.5	0.246	0.0467	0.0223	0.03669	7734	23.9	0.202	0.0394	0.0062	2.671e-10	135800	10.7	0.2033
rs7986486	avPC2	13	49336237	.	C13orf1	C13orf1	G/A	0.8129	0.0382	0.0068	1.601e-08	128142	8.1	0.2792	0.0206	0.0099	0.03696	39896	24.6	0.08636	0.0326	0.0056	6.298e-09	168038	14.2	0.1057
rs3118905	avPC2	13	50003335	.	.	DLEU7	G/A	0.713	0.0585	0.0057	9.094e-25	128196	14.8	0.14	0.0161	0.0197	0.4138	7734	56.8	0.00597	0.0552	0.0055	6.376e-24	135930	26	0.01425
rs1950500	avPC2	14	23900690	.	LTB4R,C14orf21,KIAA1305,CIDEB,RIPK3,LTB4R2,NFATC4,ADCY4	NFATC4	T/C	0.2945	0.0303	0.0056	5.468e-08	128249	10.1	0.2334	0.0352	0.0081	1.366e-05	39889	11.6	0.2653	0.0319	0.0046	4.455e-12	168138	9.2	0.2129
rs2093210	avPC2	14	60027032	.	C14orf39,SIX6	C14orf39	C/T	0.417	0.0399	0.0055	2.611e-13	127298	0	0.5684	0.0404	0.0183	0.02714	7734.01	25.7	0.1845	0.0399	0.0053	3.377e-14	135032	0.2	0.4746
rs5742915	avPC2	15	72123686	PML	GOLGA6,PML,STOML1	PML	C/T	0.46	0.0358	0.0057	3.211e-10	118632	7.1	0.3078	0.0237	0.0075	0.001497	39058	0.4	0.4617	0.0314	0.0045	4.761e-12	157690	4.7	0.3422
rs4483821	avPC2	15	82279640	ADAMTSL3	ADAMTSL3	ADAMTSL3	G/A	0.4545	0.0392	0.0052	5.851e-14	128252	0	0.9864	0.0439	0.0157	0.00511	8704	14.4	0.2924	0.0397	0.0049	9.334e-16	136956	0	0.969
rs2280470	avPC2	15	87196630	ACAN	HAPLN3,MFGE8,ACAN	ACAN	A/G	0.3355	0.03	0.0055	3.829e-08	127938	28.7	0.01086	0.0427	0.0078	5.13e-08	38910	13.3	0.2423	0.0342	0.0045	2.689e-14	166848	24.2	0.01253
rs3784757	avPC2	15	87204408	ACAN	HAPLN3,MFGE8,ACAN	ACAN	G/A	0.9653	0.086	0.0158	4.989e-08	127488	16.7	0.1102	0.0939	0.0443	0.03417	7658	0	0.8622	0.0869	0.0149	5.259e-09	135146	9.7	0.2292
rs2871865	avPC2	15	97012419	IGF1R	IGF1R	IGF1R	C/G	0.8845	0.0631	0.0089	1.309e-12	120288	10.7	0.223	0.0497	0.0302	0.0997	7733.99	0	0.8244	0.062	0.0085	3.705e-13	128022	3.9	0.3763
rs8057808	avPC2	16	52078114	RBL2	RBL2,AKTIP	AKTIP	A/G	0.3065	0.0332	0.0057	5.492e-09	127888	0	0.8353	0.0179	0.0194	0.3564	7734	0	0.6882	0.032	0.0055	4.962e-09	135622	0	0.8799
rs11866219	avPC2	16	68107250	.	NFAT5,CYB5B	NFAT5	C/A	0.6039	0.0323	0.0053	1.434e-09	127713	0	0.8015	0.0638	0.0183	0.000486	7734	0	0.7503	0.0347	0.0051	8.877e-12	135447	0	0.8247
rs7213608	avPC2	17	21219882	.	KCNJ12	KCNJ12	T/C	0.6781	0.0349	0.0057	8.781e-10	122999	0	0.5299	0.0255	0.0209	0.2229	6904	51.7	0.0234	0.0342	0.0055	4.722e-10	129903	8.4	0.2612
rs3764419	avPC2	17	26188149	ATAD5	CRLF3,ATAD5	ATAD5	C/A	0.6088	0.0369	0.0052	1.542e-12	128082	24.6	0.02881	0.0313	0.0077	4.59e-05	38686	0	0.9627	0.0351	0.0043	3.471e-16	166768	8.2	0.2426
rs584828	avPC2	17	35852756	.	IGFBP4,TNS4,TOP2A	IGFBP4	C/T	0.6032	0.0297	0.0053	2.628e-08	127772	27	0.01675	0.0276	0.0185	0.1352	7734	0	0.7558	0.0295	0.0051	6.713e-09	135506	20.9	0.04483
rs11657325	avPC2	17	40598477	HEXIM2	HEXIM2,NMT1,FMNL1,HEXIM1,ACBD4,PLCD3	HEXIM2	G/A	0.7406	0.0293	0.0059	7.787e-07	128216	0	0.6708	0.0305	0.0084	0.0002744	39899	17.4	0.1748	0.0297	0.0048	7.709e-10	168115	0	0.5004
rs12453394	avPC2	17	44349969	UBE2Z	CALCOCO2,UBE2Z,ATP5G1,SNF8,GIP	UBE2Z	G/A	0.4427	0.0284	0.0053	1.032e-07	124406	0	0.5398	0.0411	0.018	0.02205	7734	0	0.4911	0.0294	0.0051	7.241e-09	132140	0	0.5746
rs963292	avPC2	17	52197554	.	C17orf67	C17orf67	C/T	0.5054	0.0298	0.0051	5.128e-09	128256	0	0.8886	0.0165	0.0073	0.02367	39887	0	0.7759	0.0254	0.0042	1.169e-09	168143	0	0.9212
rs2079795 (rs7214743)	avPC2	17	56851431	.	TBX2,TBX4,C17orf82,BCAS3	C17orf82	T/C	0.324	0.0259	0.0055	2.064e-06	127849	10.5	0.2247	0.0286	0.0081	0.0004252	38923	5.4	0.376	0.0268	0.0046	4.119e-09	166772	7.2	0.2676
rs2727317	avPC2	17	59315034	.	GH2,PSMC5,CSH2,SMARCD2,CSHL1,FTSJ3,SCN4A,CSH1,CD79B,GH1	GH2	T/C	0.2747	0.0513	0.0058	1.076e-18	127900	6.1	0.3267	0.053	0.0201	0.008258	7734	21.7	0.2245	0.0514	0.0056	2.728e-20	135634	7.3	0.2847
rs4239437	avPC2	18	18986222	CABLES1	CABLES1	CABLES1	C/T	0.7925	0.0493	0.0064	1.39e-14	127240	0	0.8127	0.048	0.0091	1.242e-07	39902	0	0.8273	0.0489	0.0052	1.007e-20	167142	0	0.9243
rs9967417	avPC2	18	45213498	DYM	LOC642250,DYM,RPL17,C18orf32	DYM	G/C	0.4259	0.0409	0.0053	1.817e-14	128031	13.1	0.1703	0.0217	0.018	0.2285	7734	11.2	0.3327	0.0394	0.0051	9.69e-15	135765	12.6	0.163
rs12980348	avPC2	19	2132607	DOT1L	DOT1L,SF3A2,PLEKHJ1,AP3D1	DOT1L	G/T	0.3997	0.0419	0.0052	9.849e-16	128094	0.6	0.4643	0.0198	0.0075	0.008568	39893	29.7	0.04413	0.0347	0.0043	4.437e-16	167987	14.7	0.09822
rs891088	avPC2	19	7135762	INSR	INSR	INSR	G/A	0.263	0.0368	0.0059	5.459e-10	128139	1.9	0.4312	0.0192	0.0083	0.02071	39889	0	0.9846	0.0309	0.0048	1.327e-10	168028	0	0.8028
rs2738039 (rs1982075)	avPC2	19	10654749	ILF3	ILF3,QTRT1,DNM2,SLC44A2	ILF3	A/G	0.3198	0.0279	0.0055	3.16e-07	128253	0	0.6698	0.0238	0.0079	0.002708	39886	0	0.67	0.0266	0.0045	3.993e-09	168139	0	0.7733
rs6038566	avPC2	20	6563197	.	.	BMP2	A/G	0.5461	0.0342	0.0052	5.629e-11	127928	0	0.5551	0.0263	0.0176	0.1345	7734	15.9	0.2843	0.0336	0.005	1.687e-11	135662	0	0.5138
rs7274811	avPC2	20	31796842	ZNF341	PXMP4,E2F1,ZNF341	ZNF341	G/T	0.7651	0.0406	0.006	1.922e-11	128256	11.6	0.2015	0.0298	0.0085	0.000491	39894	26.8	0.06578	0.037	0.0049	4.355e-14	168150	16.5	0.07096
rs143384	avPC2	20	33489170	GDF5	GDF5,CEP250,UQCC	GDF5	G/A	0.4294	0.0793	0.0056	6.385e-46	126813	30	0.007812	0.07	0.0075	6.283e-21	39043	35.8	0.01773	0.076	0.0045	2.67e-64	165856	31.1	0.001134
rs1983528 (rs17450430)	avPC2	20	47119697	CSE1L	ARFGEF2,CSE1L,STAU1	CSE1L	A/G	0.2408	0.0322	0.006	1.02e-07	127029	0	0.4938	0.0219	0.0086	0.0103	39899	8.9	0.312	0.0288	0.0049	4.673e-09	166928	2	0.4206
rs4821083 (rs2413143)	avPC2	22	31386341	SYN3	SYN3	TIMP3	T/C	0.8444	0.0352	0.0072	1.144e-06	121058	0.4	0.4688	0.0373	0.0106	0.0004168	38917	30.2	0.04463	0.0359	0.006	1.73e-09	159975	11.2	0.1716
rs738288	avPC2	22	38237607	SMCR7L	CACNA1I,ATF4,RPS19BP1,SMCR7L,MGAT3	SMCR7L	G/A	0.456	0.0294	0.0052	1.766e-08	128217	0	0.9208	0.0133	0.0074	0.0731	39898	0.5	0.4616	0.0241	0.0043	1.52e-08	168115	0	0.8392
rs7536458	avPC3	1	118666125	.	.	SPAG17	T/G	0.7498	0.0289	0.0046	2.311e-10	133116	0	0.589	0.0398	0.0074	6.609e-08	39900	22.8	0.1049	0.0319	0.0039	2.955e-16	173016	6.2	0.2956
rs10923724	avPC3	1	119348365	.	TBX15,WARS2	TBX15	T/C	0.5814	0.0316	0.004	2.926e-15	133116	0	0.8208	0.053	0.0137	0.0001124	8696	7.3	0.3709	0.0333	0.0038	4.412e-18	141812	0	0.7436
rs9425301	avPC3	1	170630438	DNM3	PIGC,C1orf105,DNM3	DNM3	A/C	0.3538	0.0319	0.0042	4.368e-14	132920	0	0.6298	-0.0036	0.0154	0.8142	7207	0	0.5176	0.0294	0.0041	3.7e-13	140127	0	0.5322
rs2274432	avPC3	1	182287568	C1orf19	GLT25D2,C1orf19	C1orf19	A/G	0.3698	0.0253	0.0042	2.13e-09	128847	9.7	0.2415	0.0335	0.0069	1.365e-06	35954	6.3	0.3625	0.0275	0.0036	1.721e-14	164801	8.5	0.2356
rs2791550 (rs2605108)	avPC3	1	217721992	.	.	LYPLAL1	G/T	0.6871	0.0232	0.0042	4.006e-08	133066	27.2	0.01541	0.0167	0.0069	0.01517	38405	0	0.6386	0.0214	0.0036	2.275e-09	171471	17.9	0.05483
rs6726261	avPC3	2	25007490	.	RBJ,ADCY3	ADCY3	T/C	0.6543	0.0256	0.0042	1.373e-09	133110	6.3	0.3207	0.0359	0.0067	6.943e-08	39892	0.4	0.4627	0.0285	0.0036	1.144e-15	173002	4.8	0.3359
rs6715793	avPC3	2	33232767	LTBP1	LTBP1	LTBP1	T/C	0.5154	0.0214	0.004	8.994e-08	132988	38.7	0.0003438	0.0161	0.0064	0.01112	39894	0	0.7754	0.0199	0.0034	4.356e-09	172882	26.3	0.006053
rs3791675	avPC3	2	55964813	EFEMP1	EFEMP1	EFEMP1	C/T	0.7557	0.0246	0.0046	6.817e-08	132951	0	0.9255	0.0221	0.0073	0.002551	39900	5	0.3812	0.0239	0.0039	8.334e-10	172851	0	0.8635
rs1128249	avPC3	2	165236870	.	COBLL1,GRB14	COBLL1	G/T	0.591	0.0234	0.004	5.048e-09	132887	37	0.0006814	0.0209	0.0066	0.001673	38407	38	0.01129	0.0227	0.0034	3.049e-11	171294	36.6	7.42e-05
rs2342296	avPC3	2	232577269	DIS3L2	DIS3L2	DIS3L2	C/G	0.9148	0.0467	0.0076	6.566e-10	124980	0	0.5428	0.0044	0.0276	0.8736	6242	35.3	0.1165	0.0437	0.0073	2.423e-09	131222	5	0.3479
rs2920499	avPC3	3	12294058	.	PPARG	PPARG	G/A	0.4717	0.0214	0.0042	4.093e-07	132192	2.5	0.4161	0.0166	0.0067	0.01337	35722	0	0.859	0.02	0.0036	1.77e-08	167914	0	0.6862
rs2710323	avPC3	3	52790945	ITIH1	ITIH1,NEK4,TMEM110,ITIH4,MUSTN1,ITIH3	ITIH1	T/C	0.5114	0.0232	0.004	6.807e-09	133097	0.6	0.463	0.0181	0.0063	0.004145	39871	10.4	0.2872	0.0217	0.0034	1.223e-10	172968	3.3	0.3799
rs9864077	avPC3	3	64679931	.	ADAMTS9	ADAMTS9	T/C	0.6982	0.0274	0.0044	7.259e-10	121245	27.7	0.01581	0.0321	0.0068	2.736e-06	39899	16.2	0.1922	0.0288	0.0037	6.559e-15	161144	23.4	0.01594
rs9838625	avPC3	3	142546643	ZBTB38	ZBTB38,ACPL2	ZBTB38	T/C	0.4156	0.0231	0.0041	1.969e-08	131953	25.9	0.02156	0.0045	0.0147	0.7581	7732.99	0	0.6885	0.0218	0.0039	3.604e-08	139686	21.5	0.04047
rs1545854	avPC3	3	158322832	.	CCNL1	CCNL1	G/A	0.7819	0.0254	0.0049	2.086e-07	132730	0	0.9451	0.0408	0.0188	0.02962	6242.01	23	0.2242	0.0264	0.0047	2.645e-08	138972	0	0.8973
rs4057984	avPC3	4	17566298	LCORL	LCORL	LCORL	T/C	0.8488	0.0286	0.0056	2.688e-07	133096	15.4	0.1277	0.0476	0.0194	0.01413	7734	0	0.7275	0.0301	0.0054	2.307e-08	140830	10.6	0.2053
rs1115919	avPC3	4	82392421	.	PRKG2	PRKG2	T/C	0.2576	0.0252	0.0048	1.361e-07	121534	18.6	0.0893	0.0389	0.0176	0.02717	6904	10.7	0.3423	0.0261	0.0046	1.637e-08	128438	17.2	0.09417
rs7689420	avPC3	4	145787802	HHIP	HHIP	HHIP	C/T	0.8365	0.0271	0.0054	6.566e-07	133096	0	0.6665	0.029	0.0085	0.0006303	39899	9.5	0.3015	0.0276	0.0046	1.316e-09	172995	0	0.5703
rs272885	avPC3	5	131695635	SLC22A4	PDLIM4,SLC22A5,SLC22A4	SLC22A4	G/A	0.7287	0.0284	0.0049	6.448e-09	129086	0	0.7569	0.0121	0.0068	0.07653	39902	16.2	0.1927	0.0228	0.004	9.326e-09	168988	0.7	0.4616
rs6556301	avPC3	5	176460183	.	NSD1,FGFR4,ZNF346	FGFR4	T/G	0.3565	0.0243	0.0043	2.101e-08	128848	2.8	0.4092	0.011	0.0071	0.121	34272	0	0.949	0.0207	0.0037	1.737e-08	163120	0	0.6836
rs1294421	avPC3	6	6688148	.	.	LY86	G/T	0.6209	0.0216	0.0041	1.52e-07	132660	19.1	0.07554	0.0212	0.0065	0.001137	39904	10	0.2938	0.0215	0.0035	5.793e-10	172564	15.4	0.0866
rs1776897	avPC3	6	34302989	.	C6orf1,HMGA1	HMGA1	G/T	0.0815	0.0595	0.0083	9.707e-13	107508	29.4	0.01954	0.0317	0.0123	0.009828	38661	0	0.4994	0.0508	0.0069	1.537e-13	146169	21.6	0.03645
rs7759938	avPC3	6	105485647	.	LIN28B	LIN28B	C/T	0.3169	0.0313	0.0042	1.287e-13	133023	2.3	0.4207	0.0199	0.0068	0.003422	39896	18.2	0.1638	0.0282	0.0036	3.318e-15	172919	8.5	0.2313
rs1936809	avPC3	6	127518961	RSPO3	RSPO3	RSPO3	C/T	0.5398	0.0302	0.004	4.547e-14	133045	12.8	0.1745	0.0166	0.0151	0.271	7212	0	0.4933	0.0293	0.0039	3.461e-14	140257	10.4	0.2086
rs7798002	avPC3	7	25827105	.	.	NFE2L3	T/G	0.2048	0.0344	0.005	6.208e-12	132949	4.5	0.3663	0.0374	0.0177	0.03464	8704	0	0.7183	0.0346	0.0048	6.232e-13	141653	0	0.5051
rs7801581	avPC3	7	27190296	HOXA11	HOXA9,HOXA6,HOXA13,HOXA3,HOXA7,HOXA11,EVX1,HOXA5,HOXA4,HOXA10	HOXA11	T/C	0.2439	0.0273	0.0052	1.754e-07	116678	4.6	0.3645	0.0232	0.0075	0.002023	39245	18.7	0.1586	0.026	0.0043	1.225e-09	155923	8.7	0.2314
rs1516883	avPC3	9	107947088	.	.	TMEM38B	G/A	0.6729	0.0262	0.0042	5.626e-10	132525	0	0.5544	0.0071	0.0153	0.6433	7734	1.1	0.4355	0.0249	0.0041	8.336e-10	140259	0	0.5346
rs7021911	avPC3	9	132490839	FUBP3	PRDM12,FUBP3	FUBP3	C/T	0.639	0.0236	0.0043	5.267e-08	127407	0	0.977	0.021	0.0157	0.1818	7734	0	0.8091	0.0234	0.0041	1.635e-08	135141	0	0.9896
rs1628023	avPC3	10	80594264	ZMIZ1	ZMIZ1	ZMIZ1	G/T	0.5717	0.0222	0.004	2.926e-08	132804	4.6	0.3616	0.0437	0.0149	0.003372	7732	0	0.9693	0.0236	0.0039	9.32e-10	140536	0	0.5577
rs7917772	avPC3	10	104477433	SFXN2	C10orf26,ARL3,SFXN2	SFXN2	A/G	0.6213	0.0195	0.0041	2.141e-06	132951	23.9	0.0321	0.0229	0.0065	0.000449	39886	0	0.8106	0.0205	0.0035	3.585e-09	172837	11.9	0.1508
rs1317149 (rs12787112)	avPC3	11	47443461	.	RAPSN,PSMC3,SLC39A13,CUGBP1	CUGBP1	C/T	0.647	0.0201	0.0041	1.032e-06	131436	1.2	0.4478	0.02	0.0067	0.003009	38602	0	0.9463	0.0201	0.0035	9.483e-09	170038	0	0.7986
rs7949030	avPC3	11	62151457	GANAB	LOC751071,EML3,B3GAT3,MTA2,TUT1,LOC51035,GANAB,LOC221091,ROM1,C11orf48,INTS5,LOC790955,EEF1G	GANAB	G/A	0.3792	0.0241	0.0043	2.739e-08	131461	0	0.5719	0.0245	0.0153	0.1092	7733.99	0	0.7861	0.0241	0.0041	5.581e-09	139195	0	0.7125
rs8756	avPC3	12	64646019	HMGA2	HMGA2	HMGA2	C/A	0.4893	0.0251	0.0039	1.123e-10	133110	13.2	0.1668	0.0244	0.0063	0.0001112	39895	8.7	0.3158	0.0249	0.0033	5.877e-14	173005	10.7	0.1771
rs12303671	avPC3	12	123058563	ZNF664	ZNF664,CCDC92	ZNF664	T/G	0.6676	0.0241	0.0042	1.173e-08	133034	0	0.4929	0.0539	0.0153	0.0004087	7734.01	0	0.4808	0.0262	0.0041	1.007e-10	140768	1.7	0.434
rs7492628	avPC3	14	90616889	.	C14orf159,RPS6KA5	RPS6KA5	G/C	0.2985	0.0238	0.0044	8.749e-08	132140	0	0.6166	0.0246	0.0161	0.1267	7734	19.6	0.2456	0.0239	0.0042	1.903e-08	139874	0	0.5536
rs16976826 (rs12443429)	avPC3	15	54304816	RFXDC2	RFXDC2	RFXDC2	T/C	0.2089	0.0256	0.0049	1.673e-07	132921	0	0.836	0.0207	0.0079	0.008331	39070	25.9	0.07866	0.0242	0.0042	5.852e-09	171991	0	0.5179
rs12440667	avPC3	15	72018492	LOXL1	TBC1D21,PML,STOML1,LOXL1	LOXL1	C/T	0.5261	0.0216	0.004	6.817e-08	132903	0	0.796	0.0384	0.0148	0.009332	7728.99	12.3	0.321	0.0227	0.0039	3.864e-09	140632	0	0.731
rs6602997	avPC3	15	82312402	ADAMTSL3	ADAMTSL3	ADAMTSL3	T/C	0.7124	0.024	0.0044	6.817e-08	132967	3.2	0.3978	0.0122	0.016	0.4463	7733.99	36.1	0.09412	0.0232	0.0042	4.722e-08	140701	8.7	0.2494
rs2280470	avPC3	15	87196630	ACAN	HAPLN3,MFGE8,ACAN	ACAN	A/G	0.338	0.0247	0.0042	5.048e-09	132797	0	0.4828	0.0294	0.0067	1.129e-05	38910	2.9	0.419	0.026	0.0036	2.603e-13	171707	0	0.4833
rs1879143	avPC3	17	52113556	.	.	NOG	A/G	0.3487	0.0213	0.0042	4.633e-07	132467	0	0.7764	0.0365	0.0154	0.0175	7734	29.7	0.1472	0.0224	0.0041	3.461e-08	140201	0	0.6264
rs9892365	avPC3	17	56846166	.	TBX2,TBX4,C17orf82,BCAS3	C17orf82	A/G	0.3228	0.0245	0.0042	6.701e-09	132841	0	0.5815	0.0108	0.0152	0.4756	7734	22.3	0.218	0.0235	0.004	6.178e-09	140575	0	0.4832
rs4239436	avPC3	18	18985928	CABLES1	CABLES1	CABLES1	G/A	0.7918	0.0314	0.0049	1.382e-10	133070	21.8	0.04844	0.027	0.0079	0.0006017	39903	25	0.08233	0.0302	0.0042	4.256e-13	172973	21.9	0.0216
rs6140050	avPC3	20	6580901	.	.	BMP2	C/A	0.3436	0.0387	0.0043	4.497e-19	132791	25.5	0.02269	0.0243	0.0149	0.103	7734	48	0.02718	0.0376	0.0041	9.09e-20	140525	29.1	0.005764
rs2179129	avPC3	22	27780923	ZNRF3	KREMEN1,ZNRF3,C22orf31	ZNRF3	A/G	0.5832	0.0224	0.004	2.196e-08	133077	0	0.6809	0.0158	0.0065	0.01436	39900	0	0.6505	0.0206	0.0034	1.51e-09	172977	0	0.7555
Adapted from: Ried, J.S.; Jeff, J.M.; Chu, A.Y.; Bragg-Gresham, J.L.; van Dongen, J.; Huffman, J.E.; Ahluwalia, T.S.; Cadby, G.; Eklund, N.; Eriksson, J.; et al. A Principal Component Meta-Analysis on Multiple Anthropometric Traits Identifies Novel Loci for Body Shape. Nat Commun 2016, 7, doi:10.1038/ncomms13357
